# Supplementary material for: Controlling product selectivity during dioxygen reduction with Mn complexes using pendent proton donor relays and added base
Source: Royal Society of Chemistry journal article supplement (doi:10.1039/d3sc02611f), 2024-01-01
Supplement: d3sc02611f2.pdf [file d3sc02611f2.pdf]

**SUPPORTING INFORMATION for**  
**Controlling Product Selectivity During Dioxygen Reduction**  
**with Mn Complexes Using Pendant Proton Donor Relays and Added Base**

Emma N. Cook, Ian M. Courter, Diane A. Dickie, and Charles W. Machan\*

\* - machan@virginia.edu; ORCID 0000-0002-5182-1138

E.N.C. ORCID 0000-0002-0568-3600; D.A.D. ORCID 0000-0003-0939-3309

Department of Chemistry, University of Virginia, PO Box 400319, Charlottesville, VA 22904-4319

## Table of Contents

|                                                                                                                                                                                                                                                                                                                                                                        |           |
|------------------------------------------------------------------------------------------------------------------------------------------------------------------------------------------------------------------------------------------------------------------------------------------------------------------------------------------------------------------------|-----------|
| <b>Materials and Methods</b> .....                                                                                                                                                                                                                                                                                                                                     | <b>8</b>  |
| <b>Synthesis and Characterization</b> .....                                                                                                                                                                                                                                                                                                                            | <b>8</b>  |
| <i>Synthesis of Mn<sup>(p-tbu)dhbpy</sup>Cl</i> .....                                                                                                                                                                                                                                                                                                                  | 8         |
| <b>Figure S1.</b> (A) UV-vis serial dilution absorbance data from Mn <sup>(p-tbu)dhbpy</sup> Cl <b>1</b> in MeCN.....                                                                                                                                                                                                                                                  | 8         |
| <b>Table S1.</b> Summary of Evans' Method Data from Mn <sup>(p-tbu)dhbpy</sup> Cl <b>1</b> in <i>N,N'</i> -DMF (chosen for solubility reasons) supporting a high-spin <i>d</i> <sup>4</sup> complex.....                                                                                                                                                               | 9         |
| <i>Synthesis of Mn<sup>(nPr)dhbpy</sup>Cl</i> .....                                                                                                                                                                                                                                                                                                                    | 9         |
| <b>Figure S2.</b> UV-vis serial dilution of Mn <sup>(nPr)dhbpy</sup> Cl <b>2</b> in MeCN solution.....                                                                                                                                                                                                                                                                 | 9         |
| <b>Table S2.</b> Table of Evans' Method data from Mn <sup>(nPr)dhbpy</sup> Cl <b>2</b> in <i>N,N'</i> -DMF (chosen for solubility reasons) supporting a high spin <i>d</i> <sup>4</sup> complex.....                                                                                                                                                                   | 10        |
| <i>Synthesis of DIPEAHPF<sub>6</sub></i> .....                                                                                                                                                                                                                                                                                                                         | 10        |
| <b>Figure S3.</b> Molecular structure of DIPEAHPF <sub>6</sub> from single crystal X-ray diffraction studies                                                                                                                                                                                                                                                           | 10        |
| <b>Figure S4.</b> <sup>1</sup> H-NMR spectrum of DIPEAHPF <sub>6</sub> in MeCN- <i>d</i> <sub>3</sub> .....                                                                                                                                                                                                                                                            | 11        |
| <b>Figure S5.</b> <sup>13</sup> C{ <sup>1</sup> H}-NMR spectrum of DIPEAHPF <sub>6</sub> in MeCN- <i>d</i> <sub>3</sub> .....                                                                                                                                                                                                                                          | 12        |
| <b>Estimation of DIPEAHPF<sub>6</sub> pK<sub>a</sub> in MeCN</b> .....                                                                                                                                                                                                                                                                                                 | <b>13</b> |
| <b>Table S3.</b> Summary of the chemical shifts for the estimation of DIPEAHPF <sub>6</sub> pK <sub>a</sub> .....                                                                                                                                                                                                                                                      | 13        |
| <b>Figure S6.</b> <sup>1</sup> H-NMR spectra of DIPEAHPF <sub>6</sub> (purple), DIPEA (blue), TEAHPF <sub>6</sub> (green), and TEA (red) used to estimate the pK <sub>a</sub> of DIPEAHPF <sub>6</sub> in MeCN.....                                                                                                                                                    | 14        |
| <b>Figure S7.</b> <sup>1</sup> H NMR of titration of TEA into a 0.02 M solution of DIPEAHPF <sub>6</sub> for estimation of pK <sub>a</sub> of DIPEAHPF <sub>6</sub> in MeCN. MeCN- <i>d</i> <sub>3</sub> ; Varian 600 MHz.....                                                                                                                                         | 15        |
| <b>Electrochemical Analysis</b> .....                                                                                                                                                                                                                                                                                                                                  | <b>16</b> |
| <i>Electrochemistry with 1</i> .....                                                                                                                                                                                                                                                                                                                                   | 16        |
| <b>Figure S8.</b> (A) CVs of Mn <sup>(p-tbu)dhbpy</sup> Cl <b>1</b> at variable scan rates ranging from 0.05 V/s (black) to 2 V/s (red) under Ar saturation conditions.....                                                                                                                                                                                            | 16        |
| <b>Figure S9.</b> (A) CVs of Mn <sup>(p-tbu)dhbpy</sup> Cl <b>1</b> under Ar (black), O <sub>2</sub> (red) and with 10 mM DIPEAHPF <sub>6</sub> under Ar saturation (green). (B) CVs from A and catalytic trace shown (blue) with Mn <sup>(p-tbu)dhbpy</sup> Cl <b>1</b> and 10 mM DIPEAHPF <sub>6</sub> under O <sub>2</sub> saturation.....                          | 17        |
| <b>Figure S10.</b> (A) CVs of Mn <sup>(p-tbu)dhbpy</sup> Cl <b>1</b> under Ar (black), O <sub>2</sub> (red) and with 10 mM buffer (DIPEAHPF <sub>6</sub> /DIPEA) under Ar saturation (green). (B) CVs from A with catalytic trace shown (blue) with Mn <sup>(p-tbu)dhbpy</sup> Cl <b>1</b> and 10 mM DIPEAHPF <sub>6</sub> /DIPEA under O <sub>2</sub> saturation..... | 17        |
| <i>Determination of Effective Overpotential of 1</i> .....                                                                                                                                                                                                                                                                                                             | 18        |
| <b>Figure S11.</b> CVs of Mn <sup>(p-tbu)dhbpy</sup> Cl <b>1</b> with increasing DIPEAHPF <sub>6</sub> concentrations under Ar saturation conditions with 10 mM DIPEA.....                                                                                                                                                                                             | 18        |
| <b>Figure S12.</b> Control CVs of Mn <sup>(p-tbu)dhbpy</sup> Cl <b>1</b> with and without the presence of 10 mM DIPEA.....                                                                                                                                                                                                                                             | 19        |
| <b>Figure S13.</b> CVs of Mn <sup>(p-tbu)dhbpy</sup> Cl <b>1</b> (black trace) in the presence of 0.1 M TBACl (red trace) with increasing concentrations of DIPEA added.....                                                                                                                                                                                           | 19        |

|                                                                                                                                                                                                                                                                                                                                                  |           |
|--------------------------------------------------------------------------------------------------------------------------------------------------------------------------------------------------------------------------------------------------------------------------------------------------------------------------------------------------|-----------|
| <b>Figure S14.</b> CVs of Mn( <sup>p-tbu</sup> dhbpy)Cl <b>1</b> (black trace) in the presence of 0.1 M TBACl (red trace) and 10 mM DIPEA with increasing concentrations of DIPEAHPF <sub>6</sub> under Ar saturation. ....                                                                                                                      | 20        |
| <i>Electrochemistry with 2</i> .....                                                                                                                                                                                                                                                                                                             | 20        |
| <b>Figure S15.</b> A) CVs of Mn( <sup>nPr</sup> dhbpy)Cl <b>2</b> at variable scan rates ranging from 0.05 V/s (black) to 2 V/s (red) under Ar saturation conditions. ....                                                                                                                                                                       | 20        |
| <b>Figure S16.</b> CVs of Mn( <sup>nPr</sup> dhbpy)Cl <b>2</b> under Ar (black), O <sub>2</sub> (red) and with 10 mM DIPEAHPF <sub>6</sub> under Ar saturation (green).....                                                                                                                                                                      | 21        |
| <b>Figure S17.</b> (A) CVs of Mn( <sup>nPr</sup> dhbpy)Cl <b>2</b> under Ar with increasing amounts of DIPEAHPF <sub>6</sub> added.....                                                                                                                                                                                                          | 21        |
| <b>Figure S18.</b> (A) CVs of Mn( <sup>nPr</sup> dhbpy)Cl <b>2</b> under Ar (black), O <sub>2</sub> (red) and with 10 mM DIPEAHPF <sub>6</sub> /DIPEA under Ar saturation (green). (B) CVs from A with catalytic trace shown (blue) with Mn( <sup>nPr</sup> dhbpy)Cl and 10 mM DIPEAHPF <sub>6</sub> /DIPEA under O <sub>2</sub> saturation..... | 22        |
| <i>Determination of Effective Overpotential of 2</i> .....                                                                                                                                                                                                                                                                                       | 22        |
| <b>Figure S19.</b> Comparison of electrocatalytic ORR by Mn( <sup>nPr</sup> dhbpy)Cl <b>2</b> with 10 mM DIPEAHPF <sub>6</sub> with (red) and without (black) the presence of 10 mM DIPEA.....                                                                                                                                                   | 23        |
| <b>Figure S20.</b> CVs of Mn( <sup>nPr</sup> dhbpy)Cl <b>2</b> with increasing DIPEAHPF <sub>6</sub> concentrations under Ar saturation conditions with 10 mM DIPEA.....                                                                                                                                                                         | 23        |
| <b>Figure S21.</b> Control CVs of Mn( <sup>nPr</sup> dhbpy)Cl <b>2</b> with and without the presence of 10 mM DIPEA. ....                                                                                                                                                                                                                        | 24        |
| <b>Figure S22.</b> CVs of Mn( <sup>nPr</sup> dhbpy)Cl <b>2</b> (black trace) in the presence of 0.1 M TBACl (red trace) and DIPEA (green trace). ....                                                                                                                                                                                            | 24        |
| <b>Figure S23.</b> CVs of Mn( <sup>nPr</sup> dhbpy)Cl <b>2</b> (black trace) in the presence of 0.1 M TBACl (red trace) and increasing amounts of DIPEAHPF <sub>6</sub> . ....                                                                                                                                                                   | 25        |
| <b>Figure S24.</b> (A) Control CVs of 24 mM DIPEAHPF <sub>6</sub> under Ar (black) and O <sub>2</sub> (red trace). (B) Control CVs of 24 mM DIPEAHPF <sub>6</sub> and 25 mM DIPEA under O <sub>2</sub> .....                                                                                                                                     | 25        |
| <b>Description of Spectrochemical ORR Product Quantification</b> .....                                                                                                                                                                                                                                                                           | <b>26</b> |
| <b>Figure S25.</b> Calibration curve of H <sub>2</sub> O <sub>2</sub> quantification using a Ti(O)SO <sub>4</sub> colorimetric assay....                                                                                                                                                                                                         | 26        |
| <i>Unbuffered Conditions</i> .....                                                                                                                                                                                                                                                                                                               | 27        |
| <b>Figure S26.</b> H <sub>2</sub> O <sub>2</sub> product quantification of ORR by Mn( <sup>p-tbu</sup> dhbpy)Cl <b>1</b> with DIPEAHPF <sub>6</sub> ..                                                                                                                                                                                           | 27        |
| <b>Table S4.</b> Summary of H <sub>2</sub> O <sub>2</sub> selectivity of ORR by Mn( <sup>p-tbu</sup> dhbpy)Cl <b>1</b> with 10 mM DIPEAHPF <sub>6</sub> .....                                                                                                                                                                                    | 27        |
| <b>Figure S27.</b> H <sub>2</sub> O <sub>2</sub> product quantification of ORR by Mn( <sup>nPr</sup> dhbpy)Cl <b>2</b> with DIPEAHPF <sub>6</sub> ....                                                                                                                                                                                           | 27        |
| <b>Table S5.</b> Summary of H <sub>2</sub> O <sub>2</sub> selectivity of ORR by Mn( <sup>nPr</sup> dhbpy)Cl <b>2</b> with 10 mM DIPEAHPF <sub>6</sub> .....                                                                                                                                                                                      | 27        |
| <b>Figure S28.</b> Stability test of urea•H <sub>2</sub> O <sub>2</sub> in the presence of Mn( <sup>p-tbu</sup> dhbpy)Cl <b>1</b> , DIPEAHPF <sub>6</sub> , and O <sub>2</sub> .....                                                                                                                                                             | 28        |
| <b>Table S6.</b> Summary of H <sub>2</sub> O <sub>2</sub> disproportionation by Mn( <sup>p-tbu</sup> dhbpy)Cl <b>1</b> with 10 mM DIPEAHPF <sub>6</sub> .....                                                                                                                                                                                    | 28        |

|                                                                                                                                                                                                                                                                         |           |
|-------------------------------------------------------------------------------------------------------------------------------------------------------------------------------------------------------------------------------------------------------------------------|-----------|
| <b>Figure S29.</b> Stability test of urea•H <sub>2</sub> O <sub>2</sub> in the presence of Mn( <sup>nPr</sup> dhbpy)Cl <b>1</b> , DIPEAHPF <sub>6</sub> , and O <sub>2</sub> .....                                                                                      | 28        |
| <b>Table S7.</b> Summary of H <sub>2</sub> O <sub>2</sub> disproportionation by Mn( <sup>nPr</sup> dhbpy)Cl <b>2</b> with 10 mM DIPEAHPF <sub>6</sub> .....                                                                                                             | 28        |
| <i>Buffered Conditions</i> .....                                                                                                                                                                                                                                        | 29        |
| <b>Figure S30.</b> H <sub>2</sub> O <sub>2</sub> product quantification of ORR by Mn( <sup>p-tbu</sup> dhbpy)Cl <b>1</b> with DIPEAHPF <sub>6</sub> and DIPEA.....                                                                                                      | 29        |
| <b>Table S8.</b> Summary of H <sub>2</sub> O <sub>2</sub> selectivity over the course of catalytic ORR by Mn( <sup>p-tbu</sup> dhbpy)Cl <b>1</b> with 10 mM DIPEAHPF <sub>6</sub> /DIPEA.....                                                                           | 29        |
| <b>Figure S31.</b> H <sub>2</sub> O <sub>2</sub> product quantification of ORR by Mn( <sup>nPr</sup> dhbpy)Cl <b>2</b> with DIPEAHPF <sub>6</sub> and DIPEA.....                                                                                                        | 29        |
| <b>Table S9.</b> Summary of H <sub>2</sub> O <sub>2</sub> selectivity over the course of catalytic ORR by Mn( <sup>nPr</sup> dhbpy)Cl <b>2</b> with 10 mM DIPEAHPF <sub>6</sub> /DIPEA.....                                                                             | 30        |
| <i>H<sub>2</sub>O<sub>2</sub> Stability Testing under Buffered Conditions</i> .....                                                                                                                                                                                     | 30        |
| <b>Figure S32.</b> Stability test of urea•H <sub>2</sub> O <sub>2</sub> in the presence of Mn( <sup>p-tbu</sup> dhbpy)Cl <b>1</b> , DIPEAHPF <sub>6</sub> , DIPEA, and O <sub>2</sub> .....                                                                             | 30        |
| <b>Table S10.</b> Summary of H <sub>2</sub> O <sub>2</sub> disproportionation by Mn( <sup>p-tbu</sup> dhbpy)Cl <b>1</b> with 10 mM DIPEAHPF <sub>6</sub> /DIPEA.....                                                                                                    | 30        |
| <b>Figure S33.</b> Stability test of urea•H <sub>2</sub> O <sub>2</sub> in the presence of Mn( <sup>nPr</sup> dhbpy)Cl <b>2</b> , DIPEAHPF <sub>6</sub> , DIPEA, and O <sub>2</sub> .....                                                                               | 31        |
| <b>Table S11.</b> Summary of H <sub>2</sub> O <sub>2</sub> disproportionation by Mn( <sup>nPr</sup> dhbpy)Cl <b>2</b> with 10 mM DIPEAHPF <sub>6</sub> /DIPEA.....                                                                                                      | 31        |
| <b>Figure S34.</b> Stability test of urea•H <sub>2</sub> O <sub>2</sub> in the presence of Mn( <sup>p-tbu</sup> dhbpy)Cl <b>1</b> , DIPEAHPF <sub>6</sub> , DIPEA, and FeCp* <sub>2</sub> .....                                                                         | 32        |
| <b>Table S12.</b> Summary of H <sub>2</sub> O <sub>2</sub> RR by Mn( <sup>p-tbu</sup> dhbpy)Cl <b>1</b> with 10 mM DIPEAHPF <sub>6</sub> /DIPEA and 1 mM FeCp* <sub>2</sub> .....                                                                                       | 32        |
| <b>Figure S35.</b> Stability test of urea•H <sub>2</sub> O <sub>2</sub> in the presence of Mn( <sup>nPr</sup> dhbpy)Cl <b>2</b> , DIPEAHPF <sub>6</sub> , DIPEA, and FeCp* <sub>2</sub> .....                                                                           | 32        |
| <b>Table S13.</b> Summary of H <sub>2</sub> O <sub>2</sub> RR by Mn( <sup>nPr</sup> dhbpy)Cl <b>2</b> with 10 mM DIPEAHPF <sub>6</sub> /DIPEA and 1 mM FeCp* <sub>2</sub> .....                                                                                         | 33        |
| <b>Stopped-Flow Spectrochemical Methods</b> .....                                                                                                                                                                                                                       | <b>33</b> |
| <i>Determination of the Rate Law for ORR by 1 under Unbuffered Conditions</i> .....                                                                                                                                                                                     | 33        |
| <b>Figure S36.</b> The calculated R <sub>fit</sub> /n <sub>cat</sub> values from stopped-flow spectrochemical experiments with DIPEAHPF <sub>6</sub> , O <sub>2</sub> , and Cp* <sub>2</sub> Fe with varying Mn( <sup>p-tbu</sup> dhbpy)Cl <b>1</b> concentration. .... | 33        |
| <b>Figure S37.</b> The calculated R <sub>fit</sub> /n <sub>cat</sub> values from stopped-flow spectrochemical experiments with Mn( <sup>p-tbu</sup> dhbpy)Cl <b>1</b> , DIPEAHPF <sub>6</sub> , and Cp* <sub>2</sub> Fe with varying O <sub>2</sub> concentration. .... | 34        |
| <b>Figure S38.</b> The calculated R <sub>fit</sub> /n <sub>cat</sub> values from stopped-flow spectrochemical experiments with Mn( <sup>p-tbu</sup> dhbpy)Cl <b>1</b> , O <sub>2</sub> , and Cp* <sub>2</sub> Fe with varying DIPEAHPF <sub>6</sub> concentration. .... | 34        |
| <b>Figure S39.</b> The calculated R <sub>fit</sub> /n <sub>cat</sub> values from stopped-flow spectrochemical experiments with Mn( <sup>p-tbu</sup> dhbpy)Cl <b>1</b> , O <sub>2</sub> , and DIPEAHPF <sub>6</sub> with varying Cp* <sub>2</sub> Fe concentration. .... | 35        |



|                                                                                                                                                                                                                                                                                                      |    |
|------------------------------------------------------------------------------------------------------------------------------------------------------------------------------------------------------------------------------------------------------------------------------------------------------|----|
| <i>Determination of the Rate Law of ORR by 1 under Buffered Conditions</i> .....                                                                                                                                                                                                                     | 35 |
| <b>Figure S40.</b> The calculated $R_{\text{fit}}/n_{\text{cat}}$ values from stopped-flow spectrochemical experiments with DIPEAHPF <sub>6</sub> , DIPEA, O <sub>2</sub> , and Cp* <sub>2</sub> Fe with varying Mn( <sup>p-tbu</sup> dhbpy)Cl <b>1</b> concentration. .                             | 36 |
| <b>Figure S41.</b> The calculated $R_{\text{fit}}/n_{\text{cat}}$ values from stopped-flow spectrochemical experiments with Mn( <sup>p-tbu</sup> dhbpy)Cl <b>1</b> , DIPEAHPF <sub>6</sub> , DIPEA, and Cp* <sub>2</sub> Fe with varying O <sub>2</sub> concentration. .                             | 36 |
| <b>Figure S42.</b> The calculated $R_{\text{fit}}/n_{\text{cat}}$ values from stopped-flow spectrochemical experiments with Mn( <sup>p-tbu</sup> dhbpy)Cl <b>1</b> , O <sub>2</sub> , DIPEA, and Cp* <sub>2</sub> Fe with varying DIPEAHPF <sub>6</sub> :DIPEA ratio. ....                           | 37 |
| <b>Figure S43.</b> The calculated $R_{\text{fit}}/n_{\text{cat}}$ values from stopped-flow spectrochemical experiments with Mn( <sup>p-tbu</sup> dhbpy)Cl <b>1</b> , O <sub>2</sub> , and Cp* <sub>2</sub> Fe with varying buffer (DIPEAHPF <sub>6</sub> and DIPEA, 1:1 ratio) concentration. ....   | 37 |
| <b>Figure S44.</b> The calculated $R_{\text{fit}}/n_{\text{cat}}$ values from stopped-flow spectrochemical experiments with Mn( <sup>p-tbu</sup> dhbpy)Cl <b>1</b> , DIPEAHPF <sub>6</sub> , DIPEA, and O <sub>2</sub> with varying Cp* <sub>2</sub> Fe concentration. .                             | 38 |
| <i>Determination of Rate Law of ORR by 2 under Unbuffered Conditions</i> .....                                                                                                                                                                                                                       | 38 |
| <b>Figure S45.</b> The calculated initial ORR rate from stopped-flow spectrochemical experiments with DIPEAHPF <sub>6</sub> , O <sub>2</sub> , Cp* <sub>2</sub> Fe with varying Mn( <sup>nPr</sup> dhbpy)Cl <b>2</b> concentration. ....                                                             | 38 |
| <b>Figure S46.</b> The calculated initial ORR rate from stopped-flow spectrochemical experiments with, Mn( <sup>nPr</sup> dhbpy)Cl <b>2</b> , O <sub>2</sub> , Cp* <sub>2</sub> Fe with varying DIPEAHPF <sub>6</sub> concentration. ....                                                            | 39 |
| <b>Figure S47.</b> The calculated initial ORR rate from stopped-flow spectrochemical experiments with, Mn( <sup>nPr</sup> dhbpy)Cl <b>2</b> , DIPEAHPF <sub>6</sub> , O <sub>2</sub> , with varying Cp* <sub>2</sub> Fe concentration. ....                                                          | 39 |
| <b>Figure S48.</b> The calculated initial ORR rate from stopped-flow spectrochemical experiments with, Mn( <sup>nPr</sup> dhbpy)Cl <b>2</b> , DIPEAHPF <sub>6</sub> , Cp* <sub>2</sub> Fe with varying O <sub>2</sub> , concentration. ....                                                          | 40 |
| <i>Determination of Rate Law for ORR by 2 under Buffered Conditions</i> .....                                                                                                                                                                                                                        | 40 |
| <b>Figure S49.</b> The calculated $R_{\text{fit}}/n_{\text{cat}}$ values from stopped-flow spectrochemical experiments with DIPEAHPF <sub>6</sub> , DIPEA, O <sub>2</sub> , and Cp* <sub>2</sub> Fe with varying Mn( <sup>nPr</sup> dhbpy)Cl <b>2</b> concentration. ....                            | 41 |
| <b>Figure S50.</b> The calculated $R_{\text{fit}}/n_{\text{cat}}$ values from stopped-flow spectrochemical experiments with Mn( <sup>nPr</sup> dhbpy)Cl <b>2</b> , DIPEAHPF <sub>6</sub> , DIPEA, and O <sub>2</sub> with varying Cp* <sub>2</sub> Fe concentration. ....                            | 41 |
| <b>Figure S51.</b> The calculated $R_{\text{fit}}/n_{\text{cat}}$ values from stopped-flow spectrochemical experiments with Mn( <sup>nPr</sup> dhbpy)Cl <b>2</b> , O <sub>2</sub> , and Cp* <sub>2</sub> Fe with varying buffer (DIPEAHPF <sub>6</sub> and DIPEA, 1:1 ratio) concentration. ....     | 42 |
| <b>Figure S52.</b> The calculated $R_{\text{fit}}/n_{\text{cat}}$ values from stopped-flow spectrochemical experiments with Mn( <sup>nPr</sup> dhbpy)Cl <b>2</b> , O <sub>2</sub> , and Cp* <sub>2</sub> Fe with varying DIPEAHPF <sub>6</sub> :DIPEA ratio. ....                                    | 42 |
| <b>Figure S53.</b> The calculated $R_{\text{fit}}/n_{\text{cat}}$ values from stopped-flow spectrochemical experiments with Mn( <sup>nPr</sup> dhbpy)Cl <b>2</b> , DIPEAHPF <sub>6</sub> , DIPEA, and Cp* <sub>2</sub> Fe with varying O <sub>2</sub> concentration. ....                            | 43 |
| <i>Description of Stopped-Flow Data Fitting</i> .....                                                                                                                                                                                                                                                | 44 |
| <i>1Exp+Mx+C Fits</i> .....                                                                                                                                                                                                                                                                          | 44 |
| <b>Figure S54.</b> (A) Representative trace of time versus absorbance at 780 nm for ORR catalyzed by Mn( <sup>p-tbu</sup> dhbpy)Cl <b>1</b> with DIPEAHPF <sub>6</sub> /DIPEA and (B) the 1Exp+Mx+C fit (red) and residual (blue) used for data analysis using the Kinetic Studio 4.0 software. .... | 44 |

|                                                                                                                                                                                                                                                                                                   |           |
|---------------------------------------------------------------------------------------------------------------------------------------------------------------------------------------------------------------------------------------------------------------------------------------------------|-----------|
| <b>Figure S55.</b> (A) Representative trace of time versus absorbance at 780 nm for ORR catalyzed by Mn( <sup>nPr</sup> dhbpy)Cl <b>2</b> with DIPEAHPF <sub>6</sub> /DIPEA and (B) the 1Exp+Mx+C fit (red) and residual (blue) used for data analysis using the Kinetic Studio 4.0 software..... | 44        |
| <b>Figure S56.</b> (A) Representative trace of time versus absorbance at 780 nm for ORR catalyzed by Mn( <sup>p-tbu</sup> dhbpy)Cl <b>1</b> with DIPEAHPF <sub>6</sub> and (B) the 1Exp+Mx+C fit (red) and residual (blue) used for data analysis using the Kinetic Studio 4.0 software.....      | 45        |
| <i>Initial Rates Method</i> .....                                                                                                                                                                                                                                                                 | 45        |
| <b>Figure S57.</b> (A) Representative trace of time versus absorbance at 780 nm for ORR catalyzed by Mn( <sup>nPr</sup> dhbpy)Cl <b>2</b> with DIPEAHPF <sub>6</sub> and (B) the initial Linear fit (red) and residual (blue) used for data analysis using the Kinetic Studio 4.0 software. ....  | 45        |
| <b>UV-vis Spectroscopic Analysis</b> .....                                                                                                                                                                                                                                                        | <b>46</b> |
| <b>Figure S58.</b> (A) UV-vis of spectra of 23 μM Mn( <sup>p-tbu</sup> dhbpy)Cl <b>1</b> with increasing amounts of DIPEA.....                                                                                                                                                                    | 46        |
| <b>Figure S59.</b> (A) UV-vis of spectra of 26.8 μM Mn( <sup>nPr</sup> dhbpy)Cl <b>2</b> with increasing amounts of DIPEA.....                                                                                                                                                                    | 46        |
| <b>Figure S60.</b> UV-vis of spectra of 80 μM Mn( <sup>p-tbu</sup> dhbpy)Cl <b>1</b> with increasing amounts of DIPEAHPF <sub>6</sub> .....                                                                                                                                                       | 47        |
| <b>Figure S61.</b> (A) UV-vis spectra of 80 μM Mn( <sup>nPr</sup> dhbpy)Cl <b>2</b> with increasing amounts of DIPEAHPF <sub>6</sub> in MeCN. ....                                                                                                                                                | 47        |
| <i>UV-vis Spectroscopic Studies of Mn(<sup>p-tbu</sup>dhbpy)Cl 1 and Cobaltocene</i> .....                                                                                                                                                                                                        | 47        |
| <b>Figure S62.</b> (A) UV-vis spectra of an 80 μM solution of Mn( <sup>p-tbu</sup> dhbpy)Cl <b>1</b> with increasing amounts of CoCp <sub>2</sub> in MeCN under N <sub>2</sub> .....                                                                                                              | 48        |
| <b>Figure S63.</b> (A) UV-vis spectra of 80 μM solution of Mn( <sup>p-tbu</sup> dhbpy)Cl <b>1</b> in MeCN (black) under N <sub>2</sub> with 1.1 equiv of CoCp <sub>2</sub> (red) and after being exposed to air for 30 min (blue).....                                                            | 48        |
| <b>Figure S64.</b> (A) UV-vis spectra of 80 μM solution of Mn( <sup>p-tbu</sup> dhbpy)Cl <b>1</b> in MeCN (black) under N <sub>2</sub> with 1.1 equiv of CoCp <sub>2</sub> and 19.7 mM DIPEAHPF <sub>6</sub> /DIPEA (red) and after being exposed to air for 8 min (blue).....                    | 49        |
| <b>Figure S65.</b> (A) UV-vis spectra of 80 μM solution of Mn( <sup>p-tbu</sup> dhbpy)Cl <b>1</b> in MeCN (black) under N <sub>2</sub> with 1.1 equiv of CoCp <sub>2</sub> and 19.7 mM DIPEAHPF <sub>6</sub> (red) and after being exposed to air for 25 min (blue).....                          | 49        |
| <b>Figure S66.</b> (A) UV-vis spectra of 80 μM solution of Mn( <sup>p-tbu</sup> dhbpy)Cl <b>1</b> in MeCN (black) under N <sub>2</sub> with 1.1 equiv of CoCp <sub>2</sub> and 19 mM DIPEA (red) and after being exposed to air for 15 min (blue).....                                            | 50        |
| <b>Figure S67.</b> Overlay of data involving Mn( <sup>p-tbu</sup> dhbpy)Cl <b>1</b> from <b>Figs S63-S66</b> after samples were allowed to react with air completely .....                                                                                                                        | 50        |
| <b>Figure S68.</b> UV-vis spectra of 80 μM Mn( <sup>p-tbu</sup> dhbpy)Cl <b>1</b> with (red) and without (black) 1 equiv TBAOH•30H <sub>2</sub> O and with of 10 mM buffer (1:1 DIPEAHPF <sub>6</sub> :DIPEA) in the presence of 1 equiv TBAOH•30H <sub>2</sub> O (blue) .....                    | 51        |
| <i>UV-vis Spectroscopic Studies of Mn(<sup>nPr</sup>dhbpy)Cl 2 and Cobaltocene</i> .....                                                                                                                                                                                                          | 51        |
| <b>Figure S69.</b> (A) UV-vis spectra of an 80 μM solution of Mn( <sup>nPr</sup> dhbpy) <b>2</b> with increasing amounts of CoCp <sub>2</sub> in MeCN under N <sub>2</sub> . ....                                                                                                                 | 51        |

|                                                                                                                                                                                                                                                                                                                                |           |
|--------------------------------------------------------------------------------------------------------------------------------------------------------------------------------------------------------------------------------------------------------------------------------------------------------------------------------|-----------|
| <b>Figure S70.</b> (A) UV-vis spectra of 80 $\mu\text{M}$ solution of $\text{Mn}^{(\text{nPr})\text{dhbpy}}\text{Cl } \mathbf{2}$ in MeCN (black) under $\text{N}_2$ with 1.1 equiv of $\text{CoCp}_2$ (red) and after being exposed to air for 70 min (blue).....                                                             | 52        |
| <b>Figure S71.</b> (A) UV-vis spectra of 80 $\mu\text{M}$ solution of $\text{Mn}^{(\text{nPr})\text{dhbpy}}\text{Cl } \mathbf{2}$ in MeCN (black) under $\text{N}_2$ with 1.1 equiv of $\text{CoCp}_2$ and 10 mM DIPEAHPF <sub>6</sub> /DIPEA (red) and after being exposed to air for 60 min (blue).....                      | 52        |
| <b>Figure S72.</b> (A) UV-vis spectra of 80 $\mu\text{M}$ solution of $\text{Mn}^{(\text{nPr})\text{dhbpy}}\text{Cl } \mathbf{2}$ in MeCN (black) under $\text{N}_2$ with 1.1 equiv of $\text{CoCp}_2$ and 10 mM DIPEAHPF <sub>6</sub> (red) and after being exposed to air for 110 min (blue).....                            | 53        |
| <b>Figure S73.</b> (A) UV-vis spectra of 80 $\mu\text{M}$ solution of $\text{Mn}^{(\text{nPr})\text{dhbpy}}\text{Cl } \mathbf{2}$ in MeCN (black) under $\text{N}_2$ with 1.1 equiv of $\text{CoCp}_2$ and 10 mM DIPEA (red) and after being exposed to air for 60 min (blue).....                                             | 53        |
| <b>Figure S74.</b> Overlay of data involving $\text{Mn}^{(\text{nPr})\text{dhbpy}}\text{Cl } \mathbf{2}$ from <b>Figs S70-S73</b> after samples were allowed to react with air completely .....                                                                                                                                | 54        |
| <b>Figure S75.</b> UV-vis spectra of 80 $\mu\text{M}$ $\text{Mn}^{(\text{nPr})\text{dhbpy}}\text{Cl } \mathbf{2}$ with (red) and without (black) 1 equiv TBAOH $\cdot$ 30H <sub>2</sub> O and with of 10 mM buffer (1:1 DIPEAHPF <sub>6</sub> :DIPEA) in the presence of 1 equiv TBAOH $\cdot$ 30H <sub>2</sub> O (blue) ..... | 54        |
| <b>Figure S76.</b> (A) UV-vis titration of $[\text{CoCp}_2][\text{PF}_6]$ in MeCN. ....                                                                                                                                                                                                                                        | 55        |
| <b>Computational Methods</b> .....                                                                                                                                                                                                                                                                                             | <b>55</b> |
| <b>Figure S77.</b> Free energy diagram of ORR by $\text{Mn}^{(\text{nPr})\text{dhbpy}}\text{Cl } \mathbf{2}$ to H <sub>2</sub> O <sub>2</sub> .....                                                                                                                                                                            | 56        |
| <b>Single Crystal Diffraction Studies</b> .....                                                                                                                                                                                                                                                                                | <b>56</b> |
| <b>Table S14.</b> Crystallographic details for $\text{Mn}^{(\text{nPr})\text{dhbpy}}\text{Cl } \mathbf{2}$ and DIPEAHPF <sub>6</sub> .....                                                                                                                                                                                     | 57        |
| DIPEAHPF <sub>6</sub> .....                                                                                                                                                                                                                                                                                                    | 57        |
| <b>References</b> .....                                                                                                                                                                                                                                                                                                        | <b>57</b> |

## Materials and Methods

### General Considerations

All chemicals and solvents (ACS or HPLC grade) were commercially available and used as received unless otherwise indicated. For all air-sensitive reactions and electrochemical experiments, HPLC-grade solvents were obtained as anhydrous and air-free from a PPT Glass Contour Solvent Purification System. Gas cylinders were obtained from Praxair (Ar as 5.0; O<sub>2</sub> as 4.0) and passed through activated molecular sieves prior to use. Gas mixing for variable concentration experiments was accomplished using a gas proportioning rotameter from Omega Engineering. UV-vis absorbance spectra were obtained on a Cary 60 from Agilent. An Anton-Parr Multiwave Pro SOLV, NXF-8 microwave reactor was used for microwave syntheses. The concentration of O<sub>2</sub> saturation in MeCN is reported to be 8.1 mM and the saturation concentration in MeCN with added electrolyte to be 6.3 mM.<sup>1</sup>

### Synthesis and Characterization

#### Synthesis of Mn(<sup>p-tbu</sup>dhbpy)Cl

<sup>p-tbu</sup>dhbpy[H]<sub>2</sub> was synthesized according to our previously reported procedure.<sup>2</sup> Mn(<sup>p-tbu</sup>dhbpy)Cl was synthesized according to previously reported procedures.<sup>3</sup> To a 2-neck, 100 mL round bottom flask, <sup>p-tbu</sup>dhbpy[H]<sub>2</sub> (0.200 g, 0.442 mmol) was added with 50 mL of methanol and allowed to reflux for 1 h. Then, manganese(II) acetate tetrahydrate (0.108 g, 0.442 mmol) was added with dichloromethane (10 mL) and sparged with compressed air for 2 minutes. The dark green solution was allowed to reflux for 3 hours. After this time, saturated NaCl solution (50 mL) was added to the flask resulting in a dark reddish-brown suspension. The suspension was filtered, dissolved in DCM, and extracted with saturated NaCl solution (3 x 100 mL). The organic layer was separated, dried over MgSO<sub>4</sub> and the solvent was removed under reduced pressure to yield a reddish-brown solid. The solid was then dissolved in 1:1 DCM:MeCN, passed through a syringe filter and the solvent was removed under pressure to yield a reddish-brown solid. Finally, the solid was recrystallized in DCM and hexanes to yield a spectroscopically pure product in 46% yield (0.203 mmol, 0.11 g). Elemental analysis for C<sub>30</sub>H<sub>30</sub>ClMnN<sub>2</sub>O<sub>2</sub> calc'd: C 66.61; H 5.59; N 5.18, found: C 66.31, H 5.98, N 5.15. ESI-MS (*m/z*) [M – Cl]<sup>+</sup>: calc'd: 505.1688; found 505.1675.

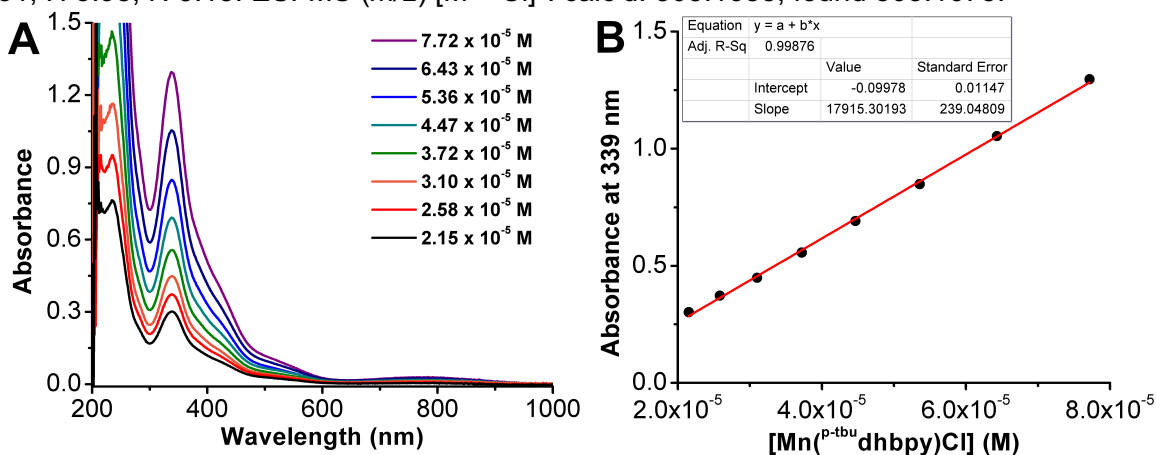

**Figure S1.** (A) UV-vis serial dilution absorbance data from Mn(<sup>p-tbu</sup>dhbpy)Cl 1 in MeCN solution. Conditions: varying concentration; quartz cell with 1 cm pathlength. (B) Plot of absorbance concentration (M) for Mn(<sup>p-tbu</sup>dhbpy)Cl 1 in MeCN solution at 339 nm (17915 M<sup>-1</sup>cm<sup>-1</sup>); R<sup>2</sup>=0.999. All: λ<sub>max</sub> = 236 nm (44786 M<sup>-1</sup>cm<sup>-1</sup>), 422 nm (5320 M<sup>-1</sup>cm<sup>-1</sup>), 525 nm (1269 M<sup>-1</sup>cm<sup>-1</sup>), 777 nm (410 M<sup>-1</sup>cm<sup>-1</sup>).

**Table S1.** Summary of Evans' Method Data from  $\text{Mn}^{(p\text{-}t\text{bu})\text{dhbpy}}\text{Cl}$  **1** in  $N,N'$ -DMF (chosen for solubility reasons) supporting a high-spin  $d^4$  complex.

| Trial | Chemical Shift (ppm) | Chemical Shift (Hz) | Total Magnetic Moment ( $\text{emu mol}^{-1}$ ) | Paramagnetic Moment ( $\text{emu mol}^{-1}$ ) | $\mu_{\text{eff}}$ (Bohr Magnetons) |
|-------|----------------------|---------------------|-------------------------------------------------|-----------------------------------------------|-------------------------------------|
| 1     | 0.12                 | 72                  | $8.94 \times 10^{-3}$                           | $9.33 \times 10^{-3}$                         | 4.72                                |
| 2     | 0.12                 | 72                  | $8.94 \times 10^{-3}$                           | $9.33 \times 10^{-3}$                         | 4.72                                |
| 3     | 0.13                 | 78                  | $9.69 \times 10^{-3}$                           | $1.01 \times 10^{-2}$                         | 4.90                                |

### Synthesis of $\text{Mn}^{(n\text{Pr})\text{dhbpy}}\text{Cl}$

$\text{Mn}^{(n\text{Pr})\text{dhbpy}}[\text{H}]_2$  was synthesized according to our previously reported procedure.  $\text{Mn}^{(n\text{Pr})\text{dhbpy}}\text{Cl}$  was synthesized according to previously reported procedures. To a 2-neck, 100 mL round bottom flask,  $\text{Mn}^{(n\text{Pr})\text{dhbpy}}[\text{H}]_2$  (0.195 g, 0.4 mmol) was brought to reflux in 75 mL methanol for 1 h. After this time, manganese(II) acetate tetrahydrate (0.104 g, 0.4 mmol) and DCM (10 mL) were added to the reaction mixture and the solution was sparged with compressed air for 2 minutes, which then turned dark green. After refluxing for 5 hours, saturated NaCl was added (75 mL). The suspension was filtered, dissolved in DCM, and extracted with saturated NaCl (3 x 100 mL). The organic layer was separated and dried over  $\text{MgSO}_4$ , passed through a syringe filter and the solvent was reduced under pressure to yield a dark brown solid. The solid was recrystallized in minimal THF and excess hexanes to yield pure product in 24% yield (55 mg). Elemental analysis for  $\text{C}_{30}\text{H}_{30}\text{ClMnN}_2\text{O}_2 \cdot 1/3\text{CH}_2\text{Cl}_2$  calc'd: C 60.59; H 5.14; N 4.66, found: C 60.45, H 5.02, N 5.07. ESI-MS ( $m/z$ )  $[\text{M} - \text{Cl}]^+$ : calc'd: 537.1586; found 537.1564.

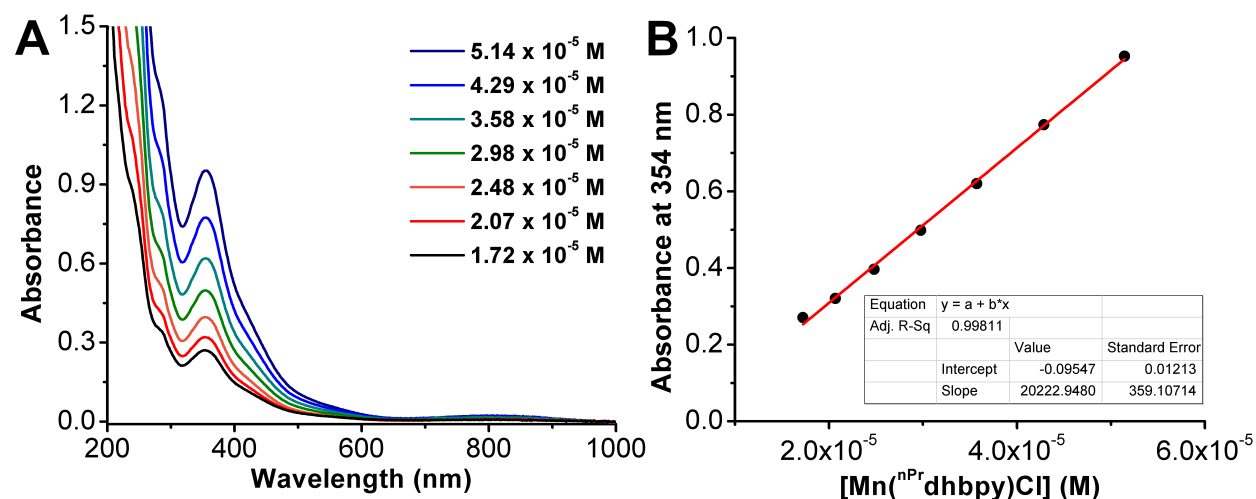

**Figure S2.** UV-vis serial dilution of  $\text{Mn}^{(n\text{Pr})\text{dhbpy}}\text{Cl}$  **2** in MeCN solution. Conditions: varying concentration; 1 cm pathlength (B) plot of concentration of  $\text{Mn}^{(n\text{Pr})\text{dhbpy}}\text{Cl}$  (M) versus absorbance at 356 nm ( $20223 \text{ M}^{-1} \text{ cm}^{-1}$ ),  $R^2 = 0.998$ . All: 288 nm ( $25576 \text{ M}^{-1} \text{ cm}^{-1}$ ), 440 nm ( $7626 \text{ M}^{-1} \text{ cm}^{-1}$ ), 540 nm ( $1447 \text{ M}^{-1} \text{ cm}^{-1}$ ), 802 nm ( $496 \text{ M}^{-1} \text{ cm}^{-1}$ ).

**Table S2.** Table of Evans' Method data from  $\text{Mn}(\text{nPr-dhbpy})\text{Cl } 2$  in  $N,N'$ -DMF (chosen for solubility reasons) supporting a high spin  $d^4$  complex.

| Trial | Chemical Shift (ppm) | Chemical Shift (Hz) | Total Magnetic Moment ( $\text{emu mol}^{-1}$ ) | Paramagnetic Moment ( $\text{emu mol}^{-1}$ ) | $\mu_{\text{eff}}$ (Bohr Magnetons) |
|-------|----------------------|---------------------|-------------------------------------------------|-----------------------------------------------|-------------------------------------|
| 1     | 0.12                 | 72                  | $8.21 \times 10^{-3}$                           | $8.61 \times 10^{-3}$                         | 4.53                                |
| 2     | 0.13                 | 78                  | $8.89 \times 10^{-3}$                           | $9.29 \times 10^{-3}$                         | 4.71                                |
| 3     | 0.12                 | 72                  | $8.21 \times 10^{-3}$                           | $8.61 \times 10^{-3}$                         | 4.53                                |

#### Synthesis of $\text{DIPEAHPF}_6$

$N,N$ -diisopropylethylammonium hexafluorophosphate ( $\text{DIPEAHPF}_6$ ) was synthesized according to previously reported procedures.<sup>4</sup> A solution of ammonium hexafluorophosphate (2.81 g, 17.2 mmol) and  $N,N$ -diisopropylethylamine (3.30 mL, 19.0 mmol) was allowed to reflux in toluene (20 mL) for 48 hours to obtain a white solid. The solution was filtered and the solid was rinsed toluene (with  $2 \times 10$  mL). The solid was dissolved in DCM, filtered, and the solvent was removed under reduced pressure to yield a white crystalline solid in 25.5% yield (1.2 g). White x-ray suitable single crystals were grown by slow evaporation from DCM. Elemental analysis for  $\text{C}_8\text{H}_{20}\text{F}_6\text{NP}$ : calc'd: C 34.91, H 7.33, N 5.09; found: C 35.00, H 7.46, N 5.09.  $^1\text{H}$  NMR ( $\text{MeCN-}d_3$ , 600 MHz)  $\delta$  (ppm): 6.18 (t, 1H), 3.67 (sept, 2H), 3.16 (q, 2H), 1.32 (m, 15H).  $^{13}\text{C}\{^1\text{H}\}$  ( $\text{MeCN-}d_3$ , 150 MHz)  $\delta$  (ppm): 56.19, 44.13, 18.79, 17.42, 13.00.

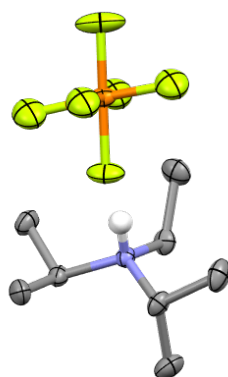

**Figure S3.** Molecular structure of  $\text{DIPEAHPF}_6$  from single crystal X-ray diffraction studies. Blue = N, gray = C, white = H, green = F, orange; thermal ellipsoids at 50%, H atoms (except N–H) and disordered F atoms omitted for clarity. CCDC 2255850.

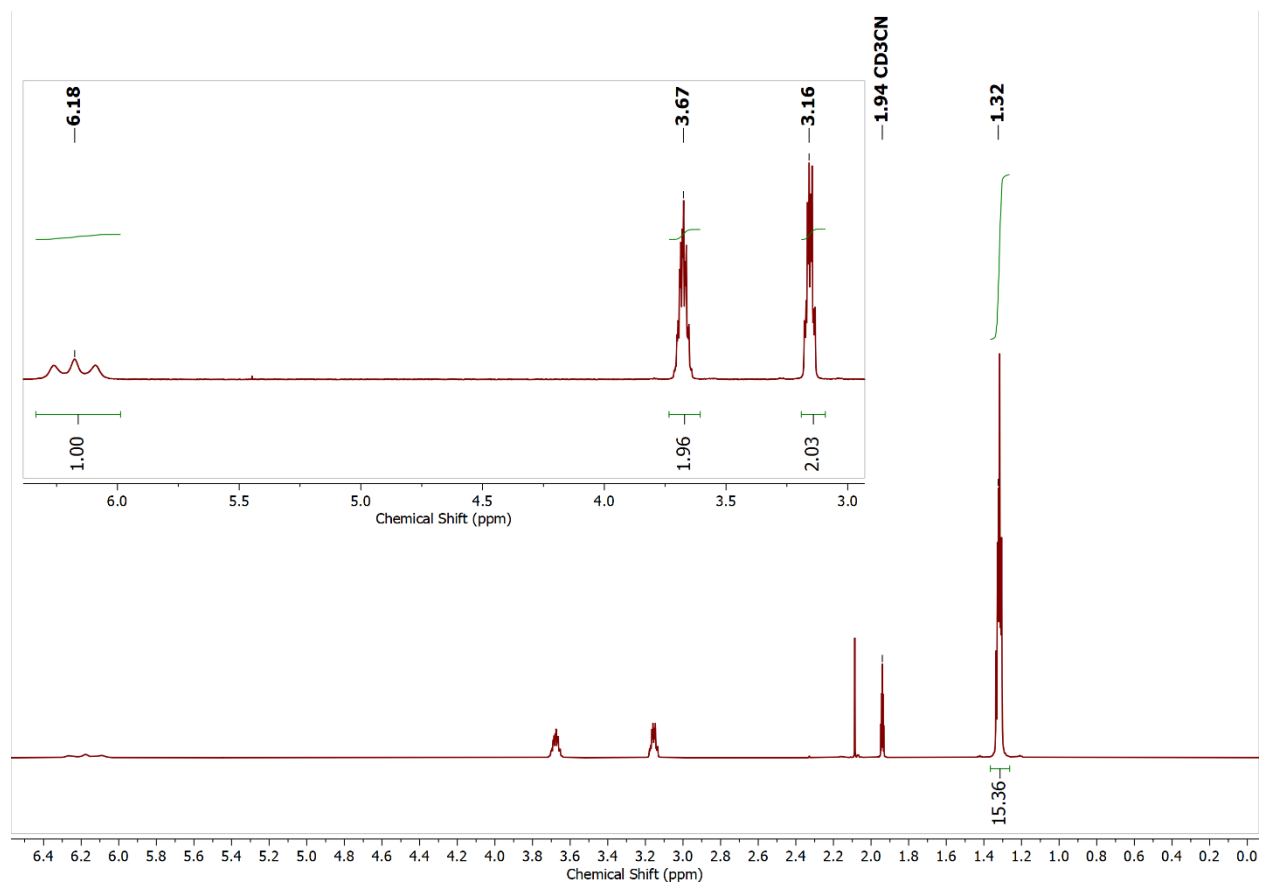

**Figure S4.**  $^1\text{H-NMR}$  spectrum of  $\text{DIPEAHPF}_6$  in  $\text{MeCN-d}_3$ ; Varian 600 MHz.

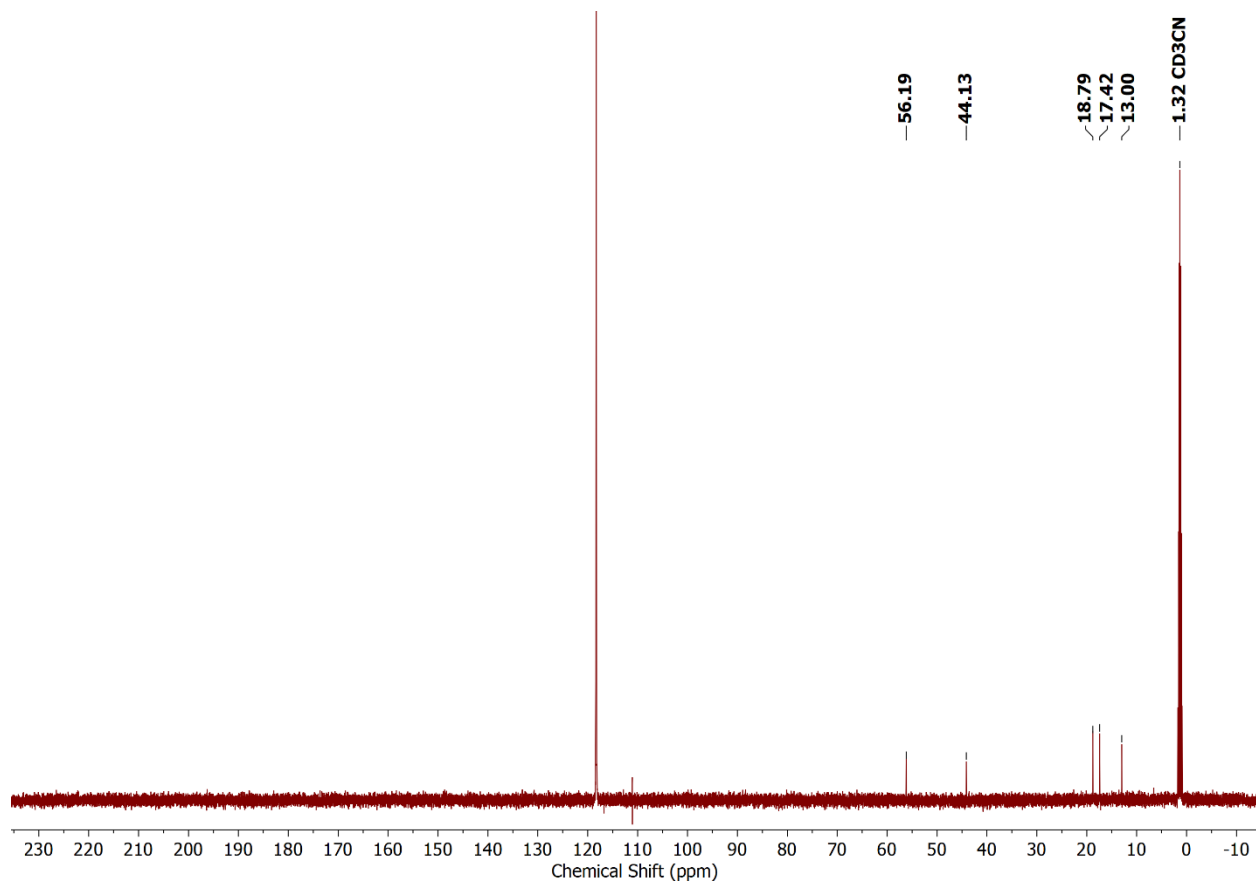

**Figure S5.**  $^{13}\text{C}\{^1\text{H}\}$ -NMR spectrum of DIPEAHPF<sub>6</sub> in MeCN-*d*<sub>3</sub>; Varian 150 MHz.



### Estimation of DIPEAHPF<sub>6</sub> pK<sub>a</sub> in MeCN

<sup>1</sup>H-NMR spectroscopy was used to estimate the pK<sub>a</sub> of DIPEAHPF<sub>6</sub> in acetonitrile relative to triethylamine (pK<sub>a</sub>(MeCN) = 18.81), as previously reported.<sup>5</sup> Triethylamine (TEA) was titrated into a solution of 0.02 M DIPEAHPF<sub>6</sub> in MeCN-*d*<sub>3</sub> and a <sup>1</sup>H-NMR spectrum was taken (**Figure S7**). The difference in chemical shift was used to determine the relative change in pK<sub>a</sub> units according to **Eqs S1-S3**. Triethylammonium hexfluorophosphate (TEAHPF<sub>6</sub>) was synthesized according to a literature procedure.<sup>4</sup>

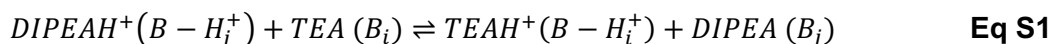

$$\frac{K_{a_i}}{K_{a_j}} = \frac{(\delta_j^{\text{obs}} - \delta_j^{\text{B}})(\delta_i^{\text{B-H}^+} - \delta_i^{\text{obs}})}{(\delta_i^{\text{obs}} - \delta_i^{\text{B}})(\delta_j^{\text{B-H}^+} - \delta_j^{\text{obs}})} \quad \text{Eq S2}$$

$$\Delta pK_{a_{ij}} = \log \left| \frac{K_{a_i}}{K_{a_j}} \right| = 0.142 \pm 0.083 \quad \text{Eq S3}$$

**Table S3.** Summary of the chemical shifts for the estimation of DIPEAHPF<sub>6</sub> pK<sub>a</sub>.

| TEA:DIPEAHPF <sub>6</sub> | $\delta_j^{\text{B}}$<br>(ppm) | $\delta_j^{\text{obs}}$<br>(ppm) | $\delta_j^{\text{B-H}^+}$<br>(ppm) | $\delta_i^{\text{B}}$<br>(ppm) | $\delta_i^{\text{obs}}$<br>(ppm) | $\delta_i^{\text{B-H}^+}$<br>(ppm) | K <sub>ai</sub> /K <sub>aj</sub> | log K <sub>ai</sub> /K <sub>aj</sub> |
|---------------------------|--------------------------------|----------------------------------|------------------------------------|--------------------------------|----------------------------------|------------------------------------|----------------------------------|--------------------------------------|
| 0.10                      | 3.01                           | 3.63                             | 3.68                               | 2.46                           | 3.07                             | 3.14                               | -1.42                            | 0.153                                |
| 0.20                      |                                | 3.58                             |                                    |                                | 3.03                             |                                    | -1.10                            | 0.0414                               |
| 0.35                      |                                | 3.53                             |                                    |                                | 2.96                             |                                    | -1.25                            | 0.0962                               |
| 0.49                      |                                | 3.48                             |                                    |                                | 2.91                             |                                    | -1.20                            | 0.0800                               |
| 0.64                      |                                | 3.45                             |                                    |                                | 2.87                             |                                    | -1.26                            | 0.100                                |
| 0.79                      |                                | 3.42                             |                                    |                                | 2.84                             |                                    | -1.24                            | 0.0951                               |
| 0.94                      |                                | 3.39                             |                                    |                                | 2.81                             |                                    | -1.24                            | 0.0918                               |
| 1.1                       |                                | 3.31                             |                                    |                                | 2.71                             |                                    | -1.39                            | 0.144                                |
| 5.7                       |                                | 3.12                             |                                    |                                | 2.55                             |                                    | -1.29                            | 0.110                                |
| 11                        |                                | 3.06                             |                                    |                                | 2.5                              |                                    | -1.29                            | 0.111                                |
| 18                        |                                | 3.05                             |                                    |                                | 2.49                             |                                    | -1.38                            | 0.139                                |
| 20                        |                                | 3.05                             |                                    |                                | 2.48                             |                                    | -2.10                            | 0.321                                |
| 23                        |                                | 3.04                             |                                    |                                | 2.48                             |                                    | -1.55                            | 0.190                                |
| 25                        |                                | 3.03                             |                                    |                                | 2.47                             |                                    | -2.06                            | 0.314                                |
| <b>Average</b>            |                                |                                  |                                    |                                |                                  |                                    | 0.142                            |                                      |
| <b>Standard Deviation</b> |                                |                                  |                                    |                                |                                  |                                    | 0.083                            |                                      |

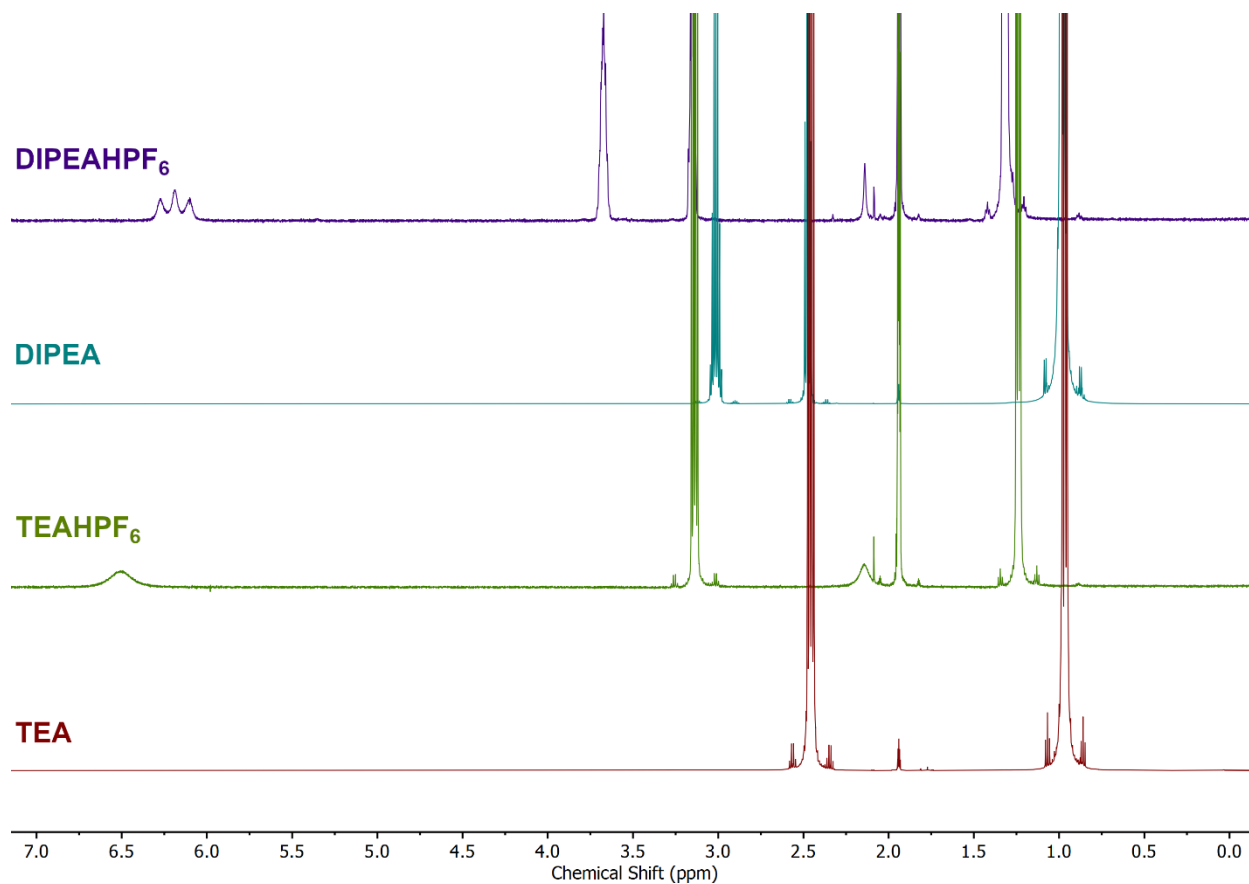

**Figure S6.** <sup>1</sup>H-NMR spectra of DIPEAHPF<sub>6</sub> (purple), DIPEA (blue), TEAHPF<sub>6</sub> (green), and TEA (red) used to estimate the pK<sub>a</sub> of DIPEAHPF<sub>6</sub> in MeCN. MeCN-*d*<sub>3</sub>; Varian 600 MHz.

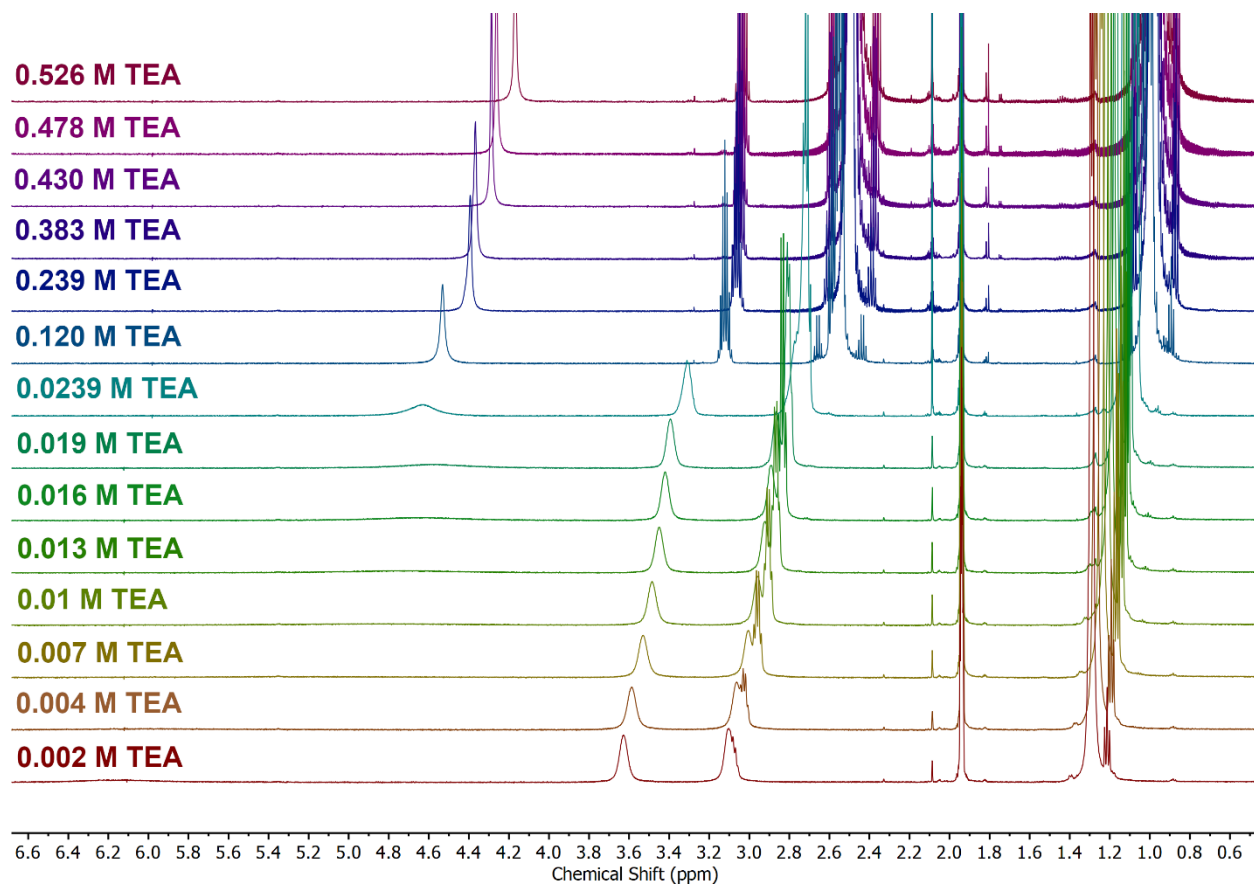

**Figure S7.**  $^1\text{H}$  NMR of titration of TEA into a 0.02 M solution of DIPEAHPF<sub>6</sub> for estimation of  $\text{p}K_{\text{a}}$  of DIPEAHPF<sub>6</sub> in MeCN. MeCN- $d_3$ ; Varian 600 MHz.

## Electrochemical Analysis

All electroanalytical experiments were performed using a Metrohm Autolab PGSTAT302N potentiostat. Glassy carbon working ( $\varnothing = 3$  mm) and non-aqueous silver/silver chloride pseudoreference electrodes behind PTFE tips were obtained from CH Instruments. The pseudoreference electrodes were obtained by depositing chloride on bare silver wire in 10% HCl at oxidizing potentials and stored in a 0.1 M tetrabutylammonium hexafluorophosphate solution in acetonitrile in the dark prior to use. The counter electrode was a glassy carbon rod ( $\varnothing = 3$  mm). All CV experiments were performed in a modified scintillation vial (20 mL volume) as a single-chamber cell with a cap modified with ports for all electrodes and a sparging needle. Tetrabutylammonium hexafluorophosphate (TBAPF<sub>6</sub>) was purified by recrystallization from ethanol and dried in a vacuum oven before being stored in a desiccator. All data were referenced to an internal ferrocene standard (ferrocenium/ferrocene reduction potential under stated conditions) unless otherwise specified. All voltammograms were corrected for internal resistance. Ferrocene was purified by sublimation prior to use. In the event that the presence of electrochemical features precluded ferrocene addition, ferrocene was added to the electrochemical cell at the end of analysis for reference.

### Electrochemistry with 1

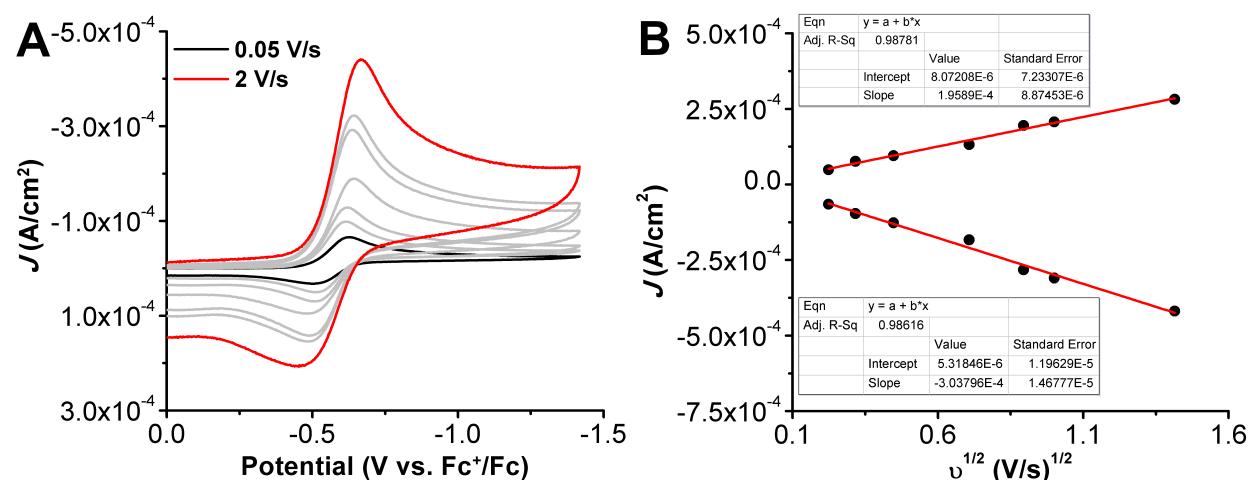

**Figure S8.** (A) CVs of Mn(p-tbu-dhbp)Cl 1 at variable scan rates ranging from 0.05 V/s (black) to 2 V/s (red) under Ar saturation conditions. (B) Linear fit data from A showing that Mn(p-tbu-dhbp)Cl is a diffusion-limited current response. Conditions: 0.5 mM Mn, 0.1 M TBAPF<sub>6</sub>/MeCN; glassy carbon working electrode, glassy carbon rod counter electrode, Ag/AgCl pseudoreference electrode; referenced to Fc<sup>+</sup>/Fc internal standard; 100 mV/s scan rate.

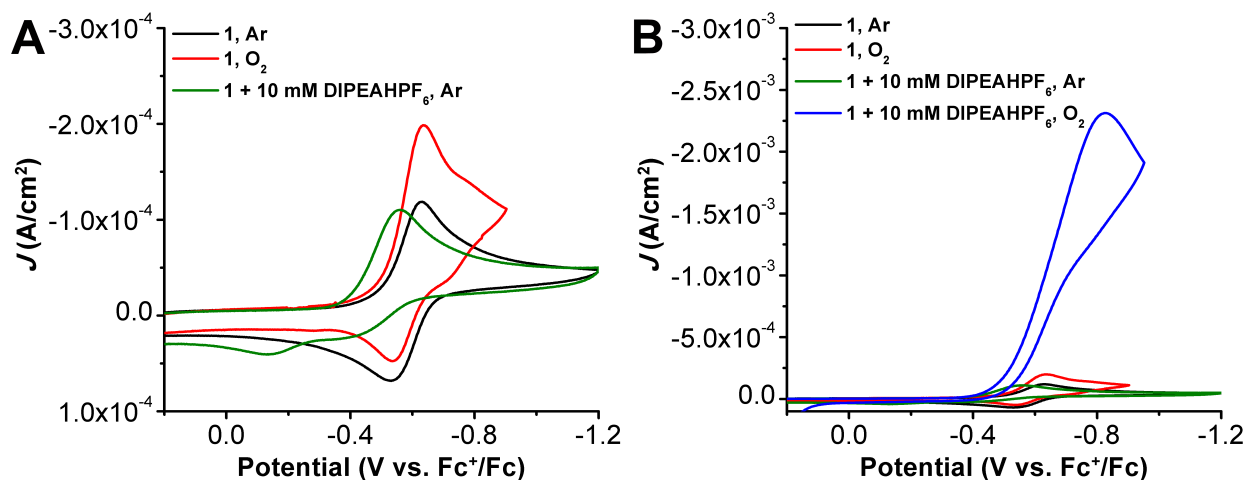

**Figure S9.** (A) CVs of  $\text{Mn}^{(p\text{-}t\text{bu})\text{dhbpy}}\text{Cl}$  1 under Ar (black),  $\text{O}_2$  (red) and with 10 mM DIPEAHPF<sub>6</sub> under Ar saturation (green). (B) CVs from A and catalytic trace shown (blue) with  $\text{Mn}^{(p\text{-}t\text{bu})\text{dhbpy}}\text{Cl}$  1 and 10 mM DIPEAHPF<sub>6</sub> under  $\text{O}_2$  saturation. Conditions: 0.5 mM Mn, 0.1 M TBAPF<sub>6</sub>/MeCN; glassy carbon working electrode, glassy carbon rod counter electrode, Ag/AgCl pseudoreference electrode; referenced to Fc<sup>+</sup>/Fc internal standard; 100 mV/s scan rate.

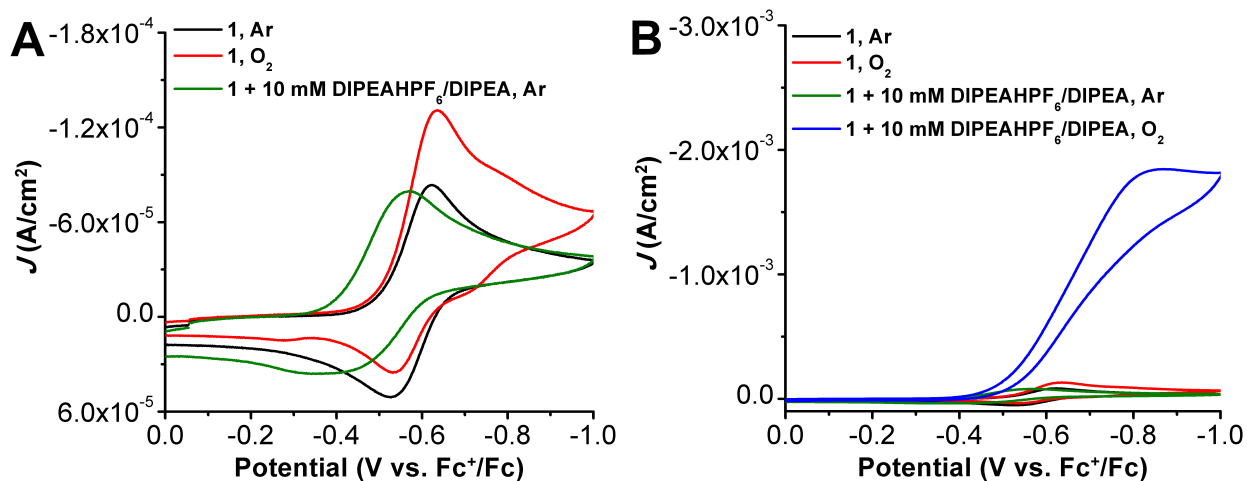

**Figure S10.** (A) CVs of  $\text{Mn}^{(p\text{-}t\text{bu})\text{dhbpy}}\text{Cl}$  1 under Ar (black),  $\text{O}_2$  (red) and with 10 mM buffer (DIPEAHPF<sub>6</sub>/DIPEA) under Ar saturation (green). (B) CVs from A with catalytic trace shown (blue) with  $\text{Mn}^{(p\text{-}t\text{bu})\text{dhbpy}}\text{Cl}$  and 10 mM DIPEAHPF<sub>6</sub>/DIPEA under  $\text{O}_2$  saturation. Conditions: 0.5 mM Mn, 0.1 M TBAPF<sub>6</sub>/MeCN; glassy carbon working electrode, glassy carbon rod counter electrode, Ag/AgCl pseudoreference electrode; referenced to Fc<sup>+</sup>/Fc internal standard; 100 mV/s scan rate.

### Determination of Effective Overpotential of 1

Utilizing the estimated  $pK_a$  of DIPEAHPF<sub>6</sub> (18.7) in MeCN, we can determine the effective overpotential according to **Eqs S4-S5**. Where  $E_{app}$  is the  $E_{1/2}$  of Mn(<sup>p-tbu</sup>dhbpy)Cl with 10 mM DIPEAHPF<sub>6</sub> buffer determined by taking the first derivative of the irreversible feature in **Figure S10**.<sup>6</sup>

$$E_{O_2/H_2O}^0 = 1.21 - 0.0592pK_a$$

$$E_{O_2/H_2O}^0(\text{MeCN, DIPEAHPF}_6) = 0.10 \text{ V vs. } Fc^+/Fc \quad \text{Eq S4}$$

$$\eta = |E_{app} - E_{O_2/H_2O}^0| = |-0.48 - 0.10| = 0.58 \text{ V} \quad \text{Eq S5}$$

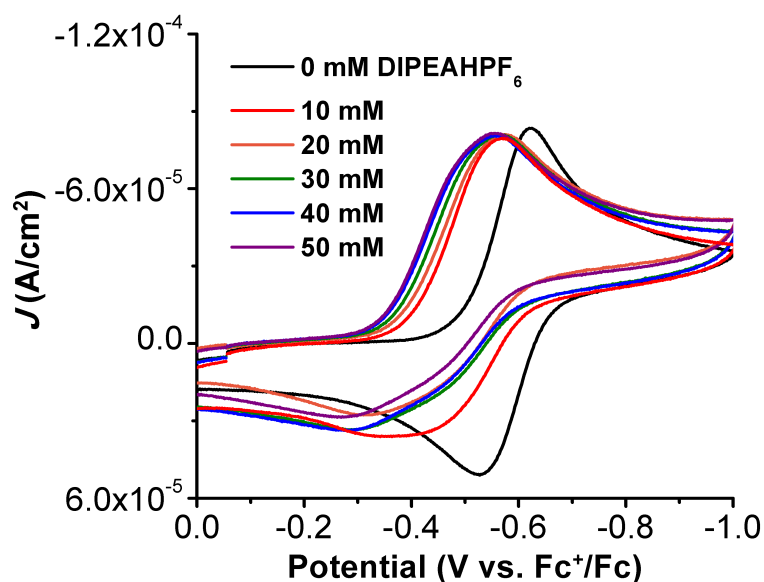

**Figure S11.** CVs of Mn(<sup>p-tbu</sup>dhbpy)Cl **1** with increasing DIPEAHPF<sub>6</sub> concentrations under Ar saturation conditions with 10 mM DIPEA. Conditions: 0.5 mM Mn, 10 mM DIPEA, 0.1 M TBAPF<sub>6</sub>/MeCN; glassy carbon working electrode, glassy carbon rod counter electrode, Ag/AgCl pseudoreference electrode; referenced to Fc<sup>+</sup>/Fc internal standard; 100 mV/s scan rate.

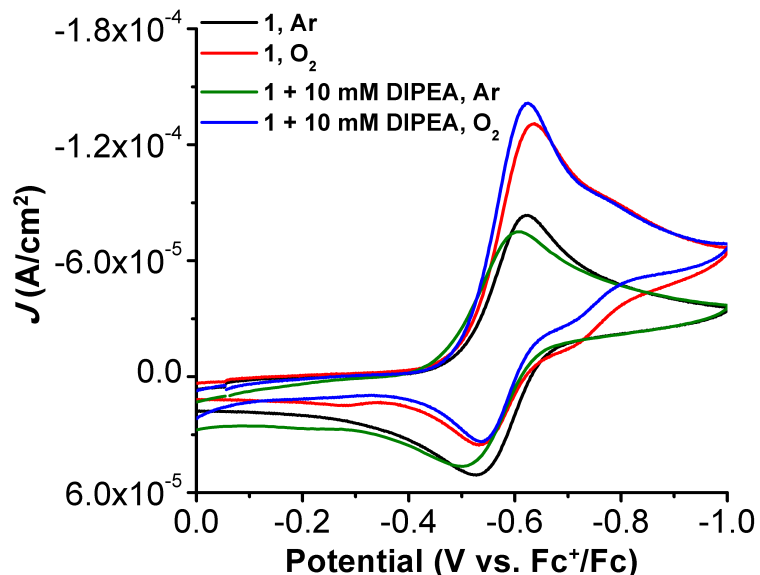

**Figure S12.** Control CVs of  $\text{Mn}^{(p\text{-}t\text{bu})\text{dhbpy}}\text{Cl}$  **1** with and without the presence of 10 mM DIPEA. Conditions: 0.5 mM Mn, 10 mM DIPEA, 0.1 M TBAPF<sub>6</sub>/MeCN; glassy carbon working electrode, glassy carbon rod counter electrode, Ag/AgCl pseudoreference electrode; referenced to Fc<sup>+</sup>/Fc internal standard; 100 mV/s scan rate.

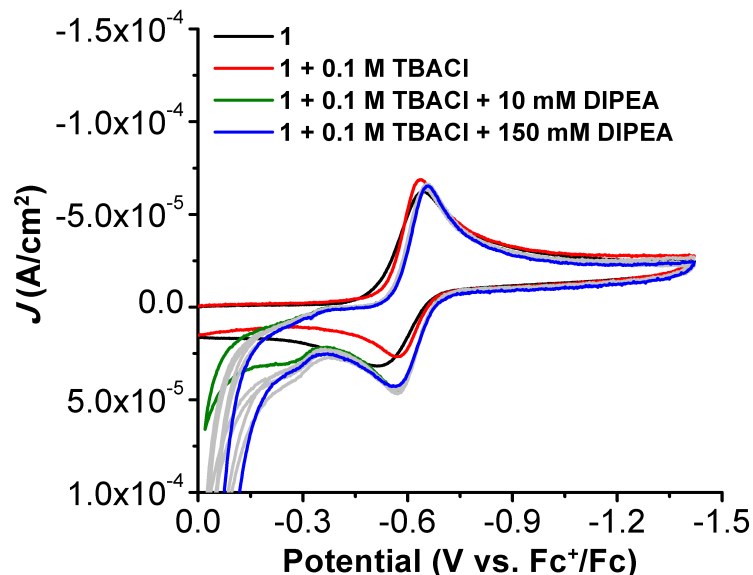

**Figure S13.** CVs of  $\text{Mn}^{(p\text{-}t\text{bu})\text{dhbpy}}\text{Cl}$  **1** (black trace) in the presence of 0.1 M TBACl (red trace) with increasing concentrations of DIPEA added. Conditions: 0.3 mM Mn, 0.1 M TBACl (if present), [DIPEA]: 10 mM (green trace), 20 mM, 30 mM, 50 mM, 100 mM, 150 mM (blue trace), 0.1 M TBAPF<sub>6</sub>/MeCN; glassy carbon working electrode, glassy carbon rod counter electrode, Ag/AgCl pseudoreference electrode; referenced to Fc<sup>+</sup>/Fc internal standard; 100 mV/s scan rate.

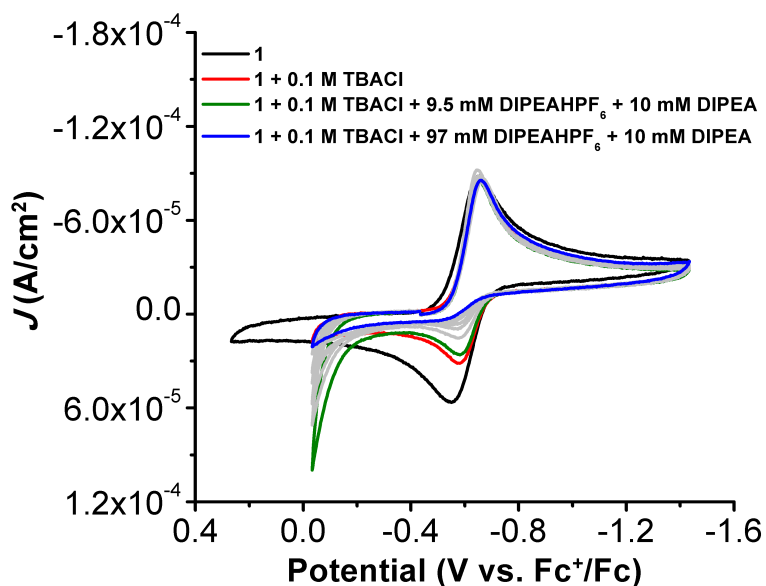

**Figure S14.** CVs of  $\text{Mn}(\text{p-}^{\text{t}}\text{bu-dhbpy})\text{Cl}$  **1** (black trace) in the presence of 0.1 M TBACl (red trace) and 10 mM DIPEA with increasing concentrations of DIPEAHPF<sub>6</sub> under Ar saturation. Conditions: 0.3 mM Mn, 0.1 M TBACl (if present), 10 mM DIPEA (if present), 0.1 M TBAPF<sub>6</sub>/MeCN; glassy carbon working electrode, glassy carbon rod counter electrode, Ag/AgCl pseudoreference electrode; referenced to Fc<sup>+</sup>/Fc internal standard; 100 mV/s scan rate. Concentration of DIPEAHPF<sub>6</sub>: 9.5 (green trace), 18.9, 29.2, 38.5, 47.8, 57.8, 97 mM (blue trace).

### Electrochemistry with 2

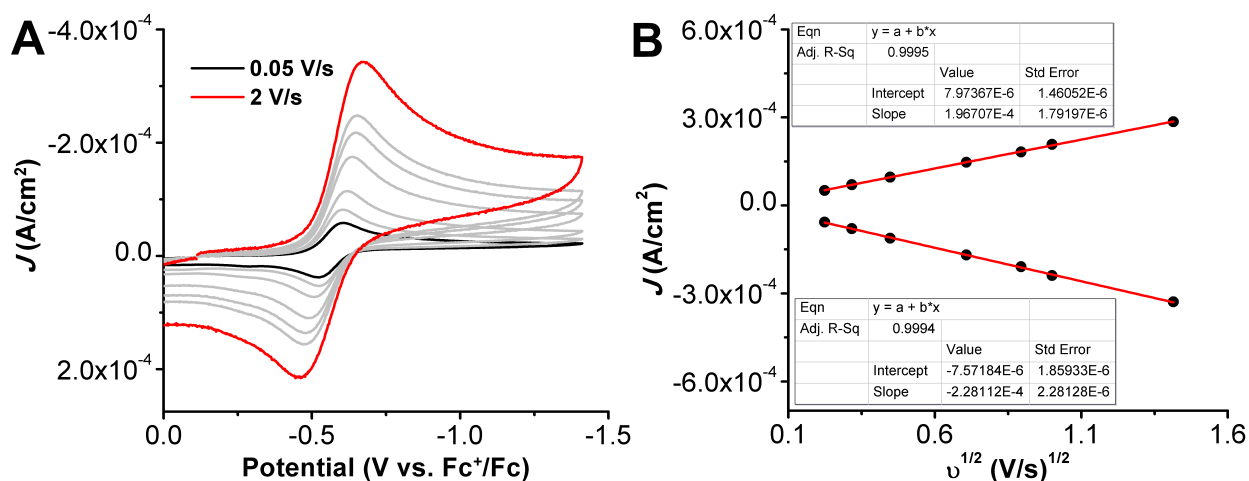

**Figure S15.** A) CVs of  $\text{Mn}(\text{nPr-dhbpy})\text{Cl}$  **2** at variable scan rates ranging from 0.05 V/s (black) to 2 V/s (red) under Ar saturation conditions. (B) Linear fit data from A showing that  $\text{Mn}(\text{nPr-dhbpy})\text{Cl}$  is a diffusion-limited current response. Conditions: 0.5 mM Mn, 0.1 M TBAPF<sub>6</sub>/MeCN; glassy carbon working electrode, glassy carbon rod counter electrode, Ag/AgCl pseudoreference electrode; referenced to Fc<sup>+</sup>/Fc internal standard; 100 mV/s scan rate.



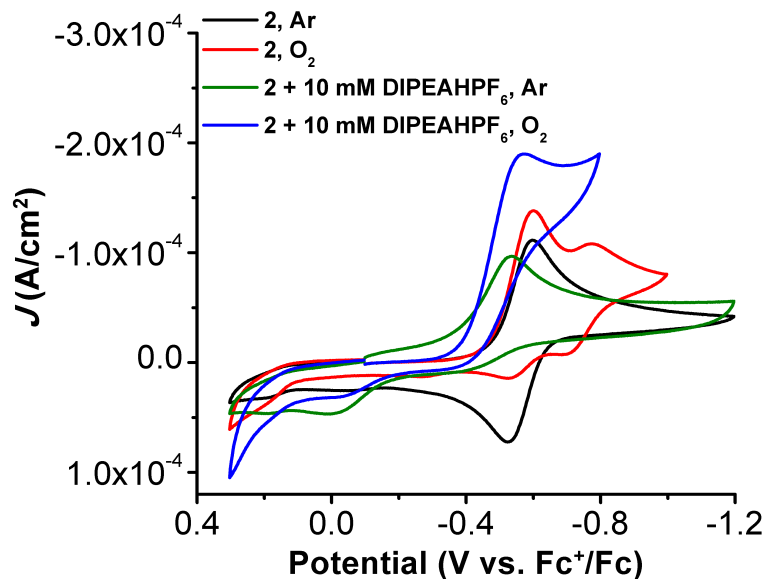

**Figure S16.** CVs of  $\text{Mn}^{(\text{nPr})\text{dhbpy}}\text{Cl } 2$  under Ar (black),  $\text{O}_2$  (red) and with 10 mM DIPEAHPF<sub>6</sub> under Ar saturation (green). Conditions: 0.5 mM Mn, 0.1 M TBAPF<sub>6</sub>/MeCN; glassy carbon working electrode, glassy carbon rod counter electrode, Ag/AgCl pseudoreference electrode; referenced to  $\text{Fc}^+/\text{Fc}$  internal standard; 100 mV/s scan rate.

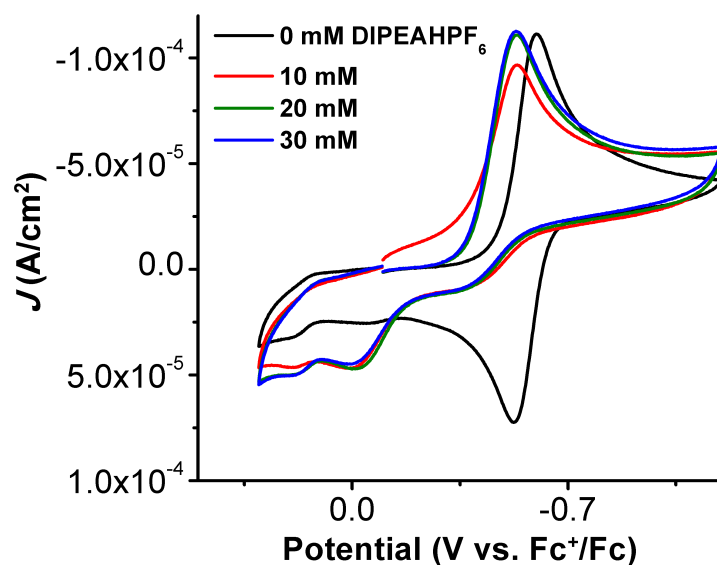

**Figure S17.** (A) CVs of  $\text{Mn}^{(\text{nPr})\text{dhbpy}}\text{Cl } 2$  under Ar with increasing amounts of DIPEAHPF<sub>6</sub> added. Conditions: 0.5 mM Mn, 0.1 M TBAPF<sub>6</sub>/MeCN; glassy carbon working electrode, glassy carbon rod counter electrode, Ag/AgCl pseudoreference electrode; referenced to  $\text{Fc}^+/\text{Fc}$  internal standard; 100 mV/s scan rate.

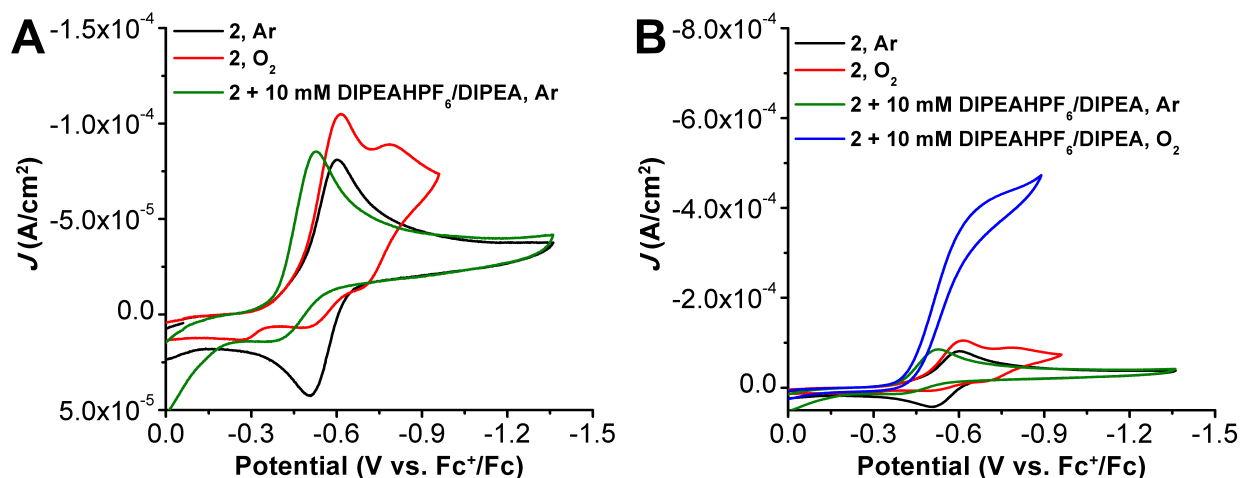

**Figure S18.** (A) CVs of  $\text{Mn}(\text{nPrdhbpy})\text{Cl}$  **2** under Ar (black),  $\text{O}_2$  (red) and with 10 mM DIPEAHPF<sub>6</sub>/DIPEA under Ar saturation (green). (B) CVs from A with catalytic trace shown (blue) with  $\text{Mn}(\text{nPrdhbpy})\text{Cl}$  and 10 mM DIPEAHPF<sub>6</sub>/DIPEA under  $\text{O}_2$  saturation. Conditions: 0.5 mM Mn, 0.1 M TBAPF<sub>6</sub>/MeCN; glassy carbon working electrode, glassy carbon rod counter electrode, Ag/AgCl pseudoreference electrode; referenced to  $\text{Fc}^+/\text{Fc}$  internal standard; 100 mV/s scan rate.

#### Determination of Effective Overpotential of **2**

Utilizing the estimated  $pK_a$  of DIPEAHPF<sub>6</sub> (18.7) in MeCN, we can determine the effective overpotential according to **Eqs S6-S7**. Where  $E_{\text{app}}$  is the  $E_{1/2}$  of  $\text{Mn}(\text{nPrdhbpy})\text{Cl}$  **2** with 10 mM DIPEAHPF<sub>6</sub> buffer determined by taking the first derivative of the irreversible feature in **Figure S18**.<sup>6</sup>

$$E_{\text{O}_2/\text{H}_2\text{O}}^0 = 1.21 - 0.0592pK_a$$

$$E_{\text{O}_2/\text{H}_2\text{O}}^0(\text{MeCN}, \text{DIPEAHPF}_6) = 0.10 \text{ V vs. } \text{Fc}^+/\text{Fc} \quad \text{Eq S6}$$

$$\eta = |E_{\text{app}} - E_{\text{O}_2/\text{H}_2\text{O}}^0| = |-0.46 - 0.10| = 0.56 \text{ V} \quad \text{Eq S7}$$

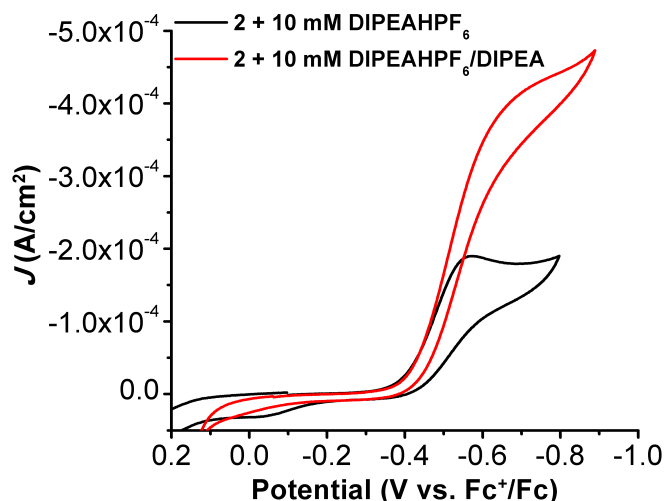

**Figure S19.** Comparison of electrocatalytic ORR by  $\text{Mn}^{(n\text{Pr})\text{dhbpy}}\text{Cl } 2$  with 10 mM  $\text{DIPEAHPF}_6$  with (red) and without (black) the presence of 10 mM DIPEA (traces from **Figure S16** and **S18** for black and red traces, respectively). Conditions: 0.5 mM Mn, 0.1 M  $\text{TBAPF}_6/\text{MeCN}$ ; glassy carbon working electrode, glassy carbon rod counter electrode, Ag/AgCl pseudoreference electrode; referenced to  $\text{Fc}^+/\text{Fc}$  internal standard; 100 mV/s scan rate.

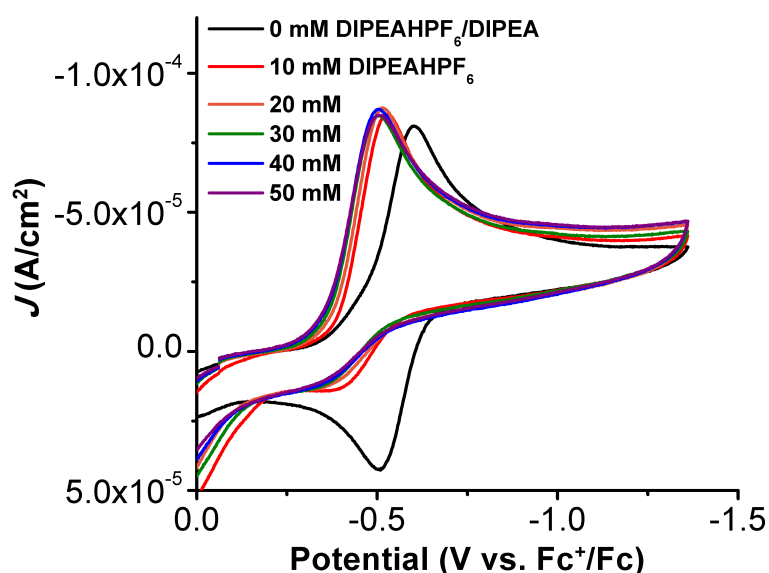

**Figure S20.** CVs of  $\text{Mn}^{(n\text{Pr})\text{dhbpy}}\text{Cl } 2$  with increasing  $\text{DIPEAHPF}_6$  concentrations under Ar saturation conditions with 10 mM DIPEA. Conditions: 0.5 mM Mn, 10 mM DIPEA, 0.1 M  $\text{TBAPF}_6/\text{MeCN}$ ; glassy carbon working electrode, glassy carbon rod counter electrode, Ag/AgCl pseudoreference electrode; referenced to  $\text{Fc}^+/\text{Fc}$  internal standard; 100 mV/s scan rate.

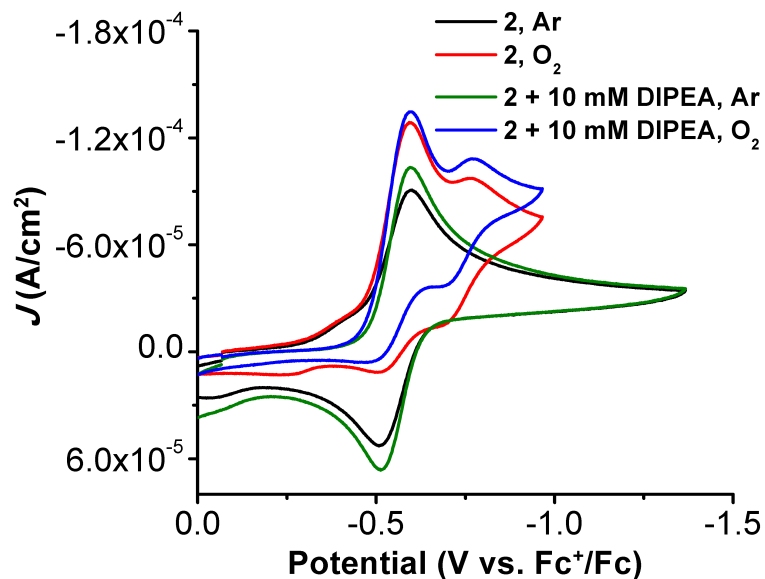

**Figure S21.** Control CVs of  $\text{Mn}^{(n\text{Pr})\text{dhbpy}}\text{Cl } 2$  with and without the presence of 10 mM DIPEA. Conditions: 0.5 mM Mn, 10 mM DIPEA, 0.1 M  $\text{TBAPF}_6/\text{MeCN}$ ; glassy carbon working electrode, glassy carbon rod counter electrode, Ag/AgCl pseudoreference electrode; referenced to  $\text{Fc}^+/\text{Fc}$  internal standard; 100 mV/s scan rate.

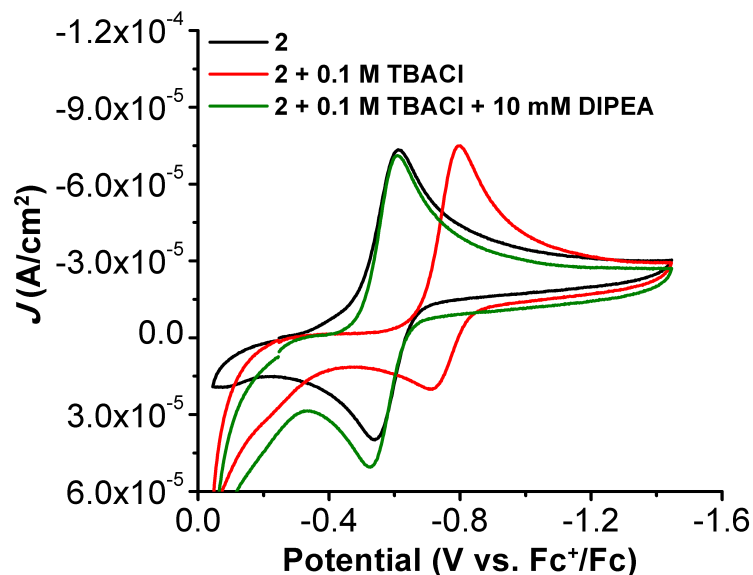

**Figure S22.** CVs of  $\text{Mn}^{(n\text{Pr})\text{dhbpy}}\text{Cl } 2$  (black trace) in the presence of 0.1 M TBACl (red trace) and DIPEA (green trace). Conditions: 0.3 mM Mn, 0.1 M  $\text{TBAPF}_6/\text{MeCN}$ ; glassy carbon working electrode, glassy carbon rod counter electrode, Ag/AgCl pseudoreference electrode; referenced to  $\text{Fc}^+/\text{Fc}$  internal standard; 100 mV/s scan rate.

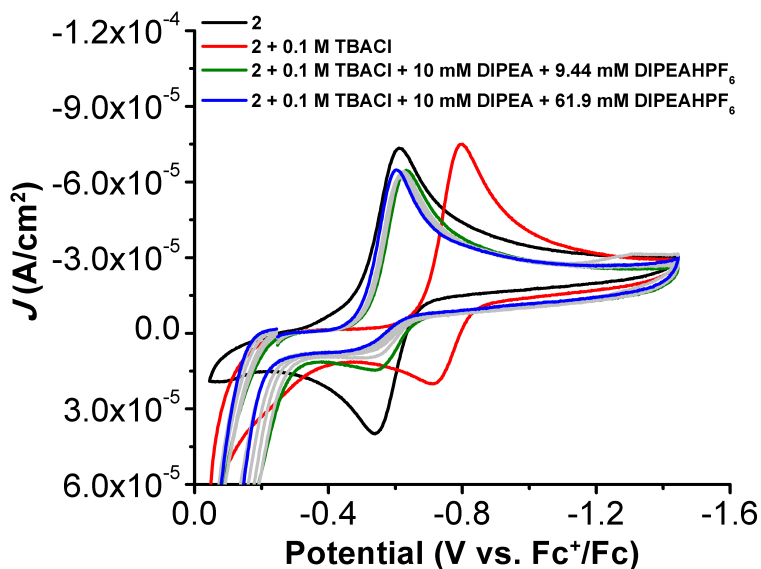

**Figure S23.** CVs of  $\text{Mn}^{(\text{nPr})\text{dhbpy}}\text{Cl } 2$  (black trace) in the presence of 0.1 M TBACl (red trace) and increasing amounts of DIPEAHPF<sub>6</sub>. Conditions: 0.3 mM Mn, 10 mM DIPEA (if present), 0.1 M TBAPF<sub>6</sub>/MeCN; glassy carbon working electrode, glassy carbon rod counter electrode, Ag/AgCl pseudoreference electrode; referenced to Fc<sup>+</sup>/Fc internal standard; 100 mV/s scan rate. Concentrations of DIPEAHPF<sub>6</sub>: 9.44 (green trace), 19.1, 29.3, 39.2, 51.7, 61.9 mM (blue trace).

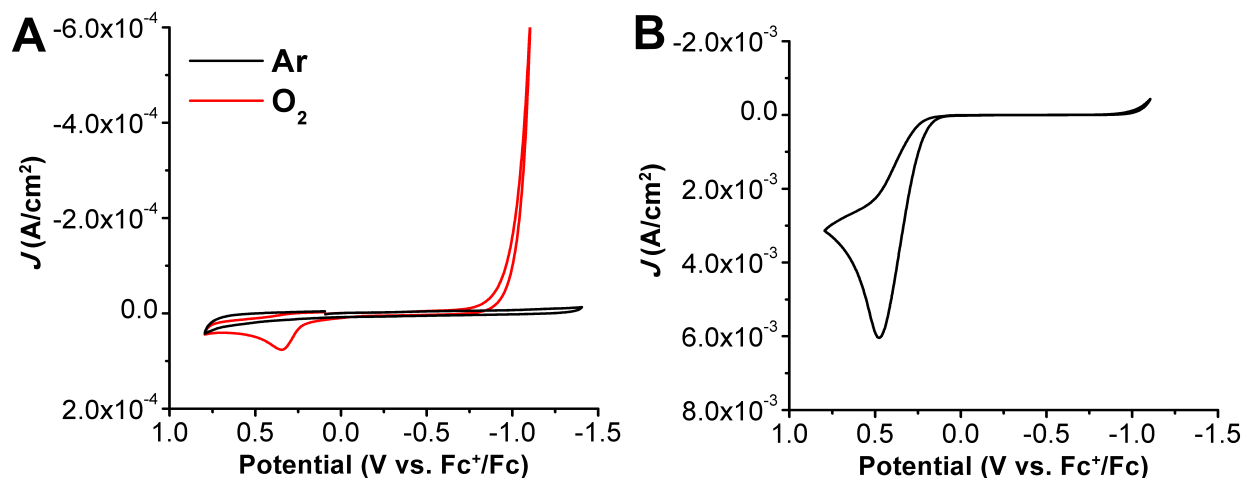

**Figure S24.** (A) Control CVs of 24 mM DIPEAHPF<sub>6</sub> under Ar (black) and O<sub>2</sub> (red trace). (B) Control CVs of 24 mM DIPEAHPF<sub>6</sub> and 25 mM DIPEA under O<sub>2</sub>. Conditions: 24 mM DIPEAHPF<sub>6</sub>, 0.1 M TBAPF<sub>6</sub>/MeCN; glassy carbon working electrode, glassy carbon rod counter electrode, Ag/AgCl pseudoreference electrode; referenced to Fc<sup>+</sup>/Fc internal standard; 100 mV/s scan rate.

## Description of Spectrochemical ORR Product Quantification

The concentration of catalytically produced  $\text{H}_2\text{O}_2$  was determined by  $\text{Ti}(\text{O})\text{SO}_4$  as previously reported.<sup>7</sup> A calibration curve (**Figure S25**) was obtained through a serial dilution of a stock solution of urea• $\text{H}_2\text{O}_2$  in MeCN.  $\text{H}_2\text{O}_2$  was extracted by adding 2 mL of a standard solution to 10 mL DCM and 5 mL of DI  $\text{H}_2\text{O}$ , inverted and allowed to separate. Then, 3 mL of the aqueous layer was removed and put into the cuvette where a UV-vis spectrum was taken before and after the addition of 0.1 mL of  $\text{Ti}(\text{O})\text{SO}_4$  solution. The difference in absorbance at 408 nm was used to construct the calibration curve (**Figure S25**).

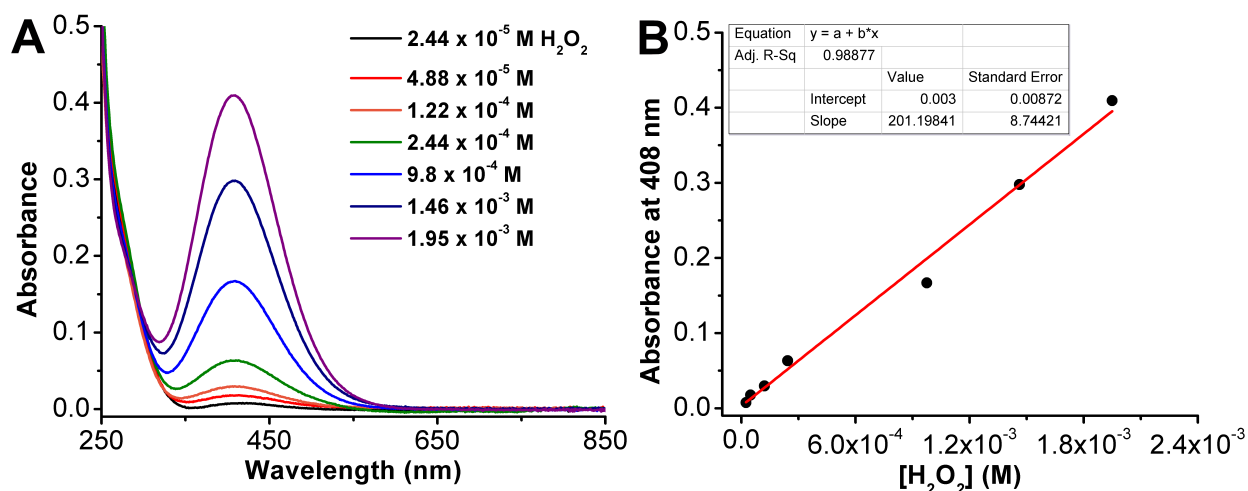

**Figure S25.** Calibration curve of  $\text{H}_2\text{O}_2$  quantification using a  $\text{Ti}(\text{O})\text{SO}_4$  colorimetric assay. (A) Serial dilution of urea• $\text{H}_2\text{O}_2$  using the method described above. (B) Calibration curve made from data in A.

Generally, to determine the ORR selectivity of  $\text{Mn}^{(\text{nPr})\text{d}h\text{bpy}}\text{Cl}$  **1** and  $\text{Mn}^{(\text{p-tbu})\text{d}h\text{bpy}}\text{Cl}$  **2**, solutions containing 80  $\mu\text{M}$   $[\text{Mn}]$  and 20 mM DIPEAHPF<sub>6</sub> and DIPEA (if present) were sparged with  $\text{O}_2$  gas and rapidly mixed in a 1:1 ratio with a  $\text{N}_2$  saturated 2 mM  $\text{Cp}^*_2\text{Fe}$  solution with a final volume of 8 mL (final concentrations: 40  $\mu\text{M}$   $\text{Mn}$ , 1 mM  $\text{Cp}^*_2\text{Fe}$ , 10 mM DIPEAHPF<sub>6</sub> and 10 mM DIPEA). Over the course of the reaction, 2 mL aliquots of the catalytic solution were removed and extracted with 10 mL of DCM and 5 mL of DI  $\text{H}_2\text{O}$ . The aqueous layer (3 mL) was removed and put into the cuvette and a UV-vis spectrum was taken before and after the addition of 0.1 mL of  $\text{Ti}(\text{O})\text{SO}_4$ . Aliquots were taken at the indicated time points and experiments were done in triplicate. **Eqs S8-S9** were used to calculate the % selectivity of  $\text{H}_2\text{O}_2$ .

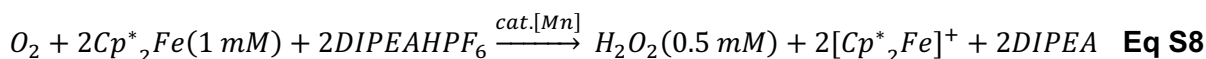

$$\text{Abs@408 nm (red trace)} - \text{Abs@408 nm (black trace)} = 201.2[\text{H}_2\text{O}_2]_{\text{exp}} + 0.003$$

$$\frac{[\text{H}_2\text{O}_2]_{\text{exp}}}{0.5 \text{ mM } \text{H}_2\text{O}_2} \times 100 = \% \text{H}_2\text{O}_2 \text{ selectivity} \quad \text{Eq S9}$$

Unbuffered Conditions

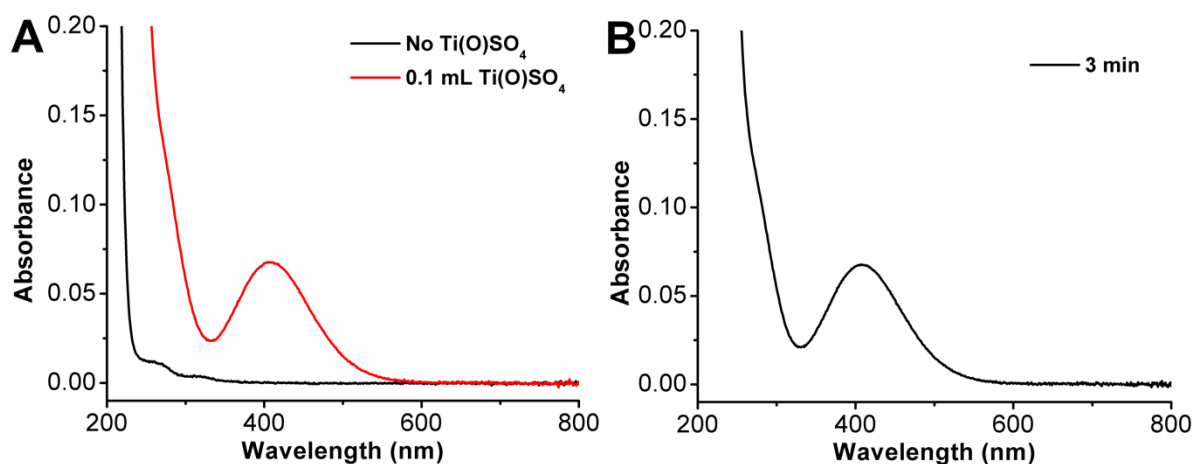

**Figure S26.** H<sub>2</sub>O<sub>2</sub> product quantification of ORR by Mn(<sup>p-tbu</sup>dhbpy)Cl **1** with DIPEAHPF<sub>6</sub>. (A) UV-vis spectrum of extracted solution after 3 min of reaction time before (black) and after (red) 0.1 mL of 0.1 M Ti(O)SO<sub>4</sub> solution was added. (B) Corrected spectra (red – black trace from A). Conditions: 40 μM Mn(<sup>p-tbu</sup>dhbpy)Cl, 10 mM DIPEAHPF<sub>6</sub>, 1 mM Cp\*<sub>2</sub>Fe, 4.05 mM O<sub>2</sub> in MeCN.

**Table S4.** Summary of H<sub>2</sub>O<sub>2</sub> selectivity of ORR by Mn(<sup>p-tbu</sup>dhbpy)Cl **1** with 10 mM DIPEAHPF<sub>6</sub> (Figure S26).

| Time (min) | % H <sub>2</sub> O <sub>2</sub> | % H <sub>2</sub> O |
|------------|---------------------------------|--------------------|
| 3          | 64.2 ± 6.9                      | 35.8 ± 6.9         |

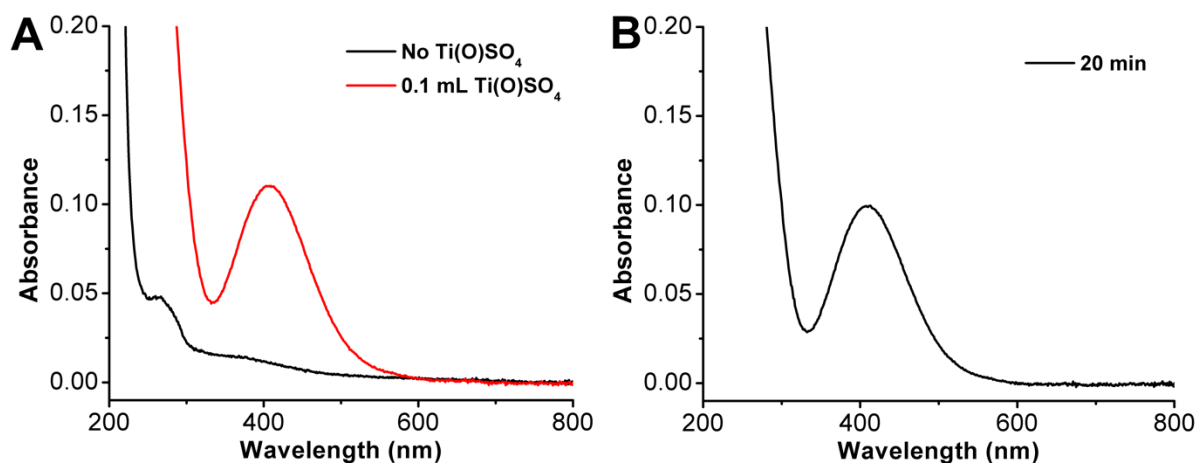

**Figure S27.** H<sub>2</sub>O<sub>2</sub> product quantification of ORR by Mn(<sup>nPr</sup>dhbpy)Cl **2** with DIPEAHPF<sub>6</sub>. (A) UV-vis spectrum of extracted solution before (black) and after (red) 0.1 mL of 0.1 M Ti(O)SO<sub>4</sub> solution was added, 20 min. (B) Corrected spectra (red – black trace from A). Conditions: 40 μM Mn(<sup>nPr</sup>dhbpy)Cl, 10 mM DIPEAHPF<sub>6</sub>/DIPEA, 1 mM Cp\*<sub>2</sub>Fe, 4.05 mM O<sub>2</sub> in MeCN.

**Table S5.** Summary of H<sub>2</sub>O<sub>2</sub> selectivity of ORR by Mn(<sup>nPr</sup>dhbpy)Cl **2** with 10 mM DIPEAHPF<sub>6</sub> (Figure S27).

| Time (min) | % H <sub>2</sub> O <sub>2</sub> | % H <sub>2</sub> O |
|------------|---------------------------------|--------------------|
| 20         | 96.2 ± 4.1                      | 3.8 ± 4.1          |

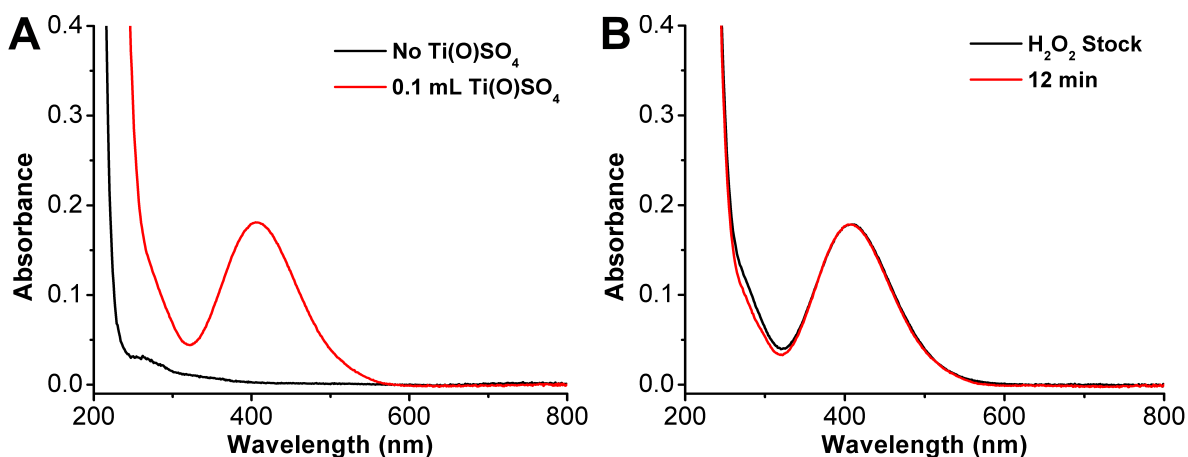

**Figure S28.** Stability test of urea•H<sub>2</sub>O<sub>2</sub> in the presence of Mn(<sup>p-tbu</sup>dhbpy)Cl **1**, DIPEAHPF<sub>6</sub>, and O<sub>2</sub>. (A) UV-vis spectra of an extracted sample after 12 minutes of reaction time before (black) and after (red) the addition of 0.1 mL of 0.1 M Ti(O)SO<sub>4</sub>. (B) Corrected UV-vis spectra (red – black trace from A) of H<sub>2</sub>O<sub>2</sub> only (black) and after 12 min (red). Conditions: 40 μM Mn(<sup>p-tbu</sup>dhbpy)Cl, 10 mM DIPEAHPF<sub>6</sub>, 0.87 mM urea•H<sub>2</sub>O<sub>2</sub>, 4.05 mM O<sub>2</sub> in MeCN.

**Table S6.** Summary of H<sub>2</sub>O<sub>2</sub> disproportionation by Mn(<sup>p-tbu</sup>dhbpy)Cl **1** with 10 mM DIPEAHPF<sub>6</sub> (Figure S28) relative to 0.87 mM H<sub>2</sub>O<sub>2</sub> stock solution.

| Time (min) | % H <sub>2</sub> O <sub>2</sub> Recovered |
|------------|-------------------------------------------|
| 12         | 104 ± 8.8                                 |

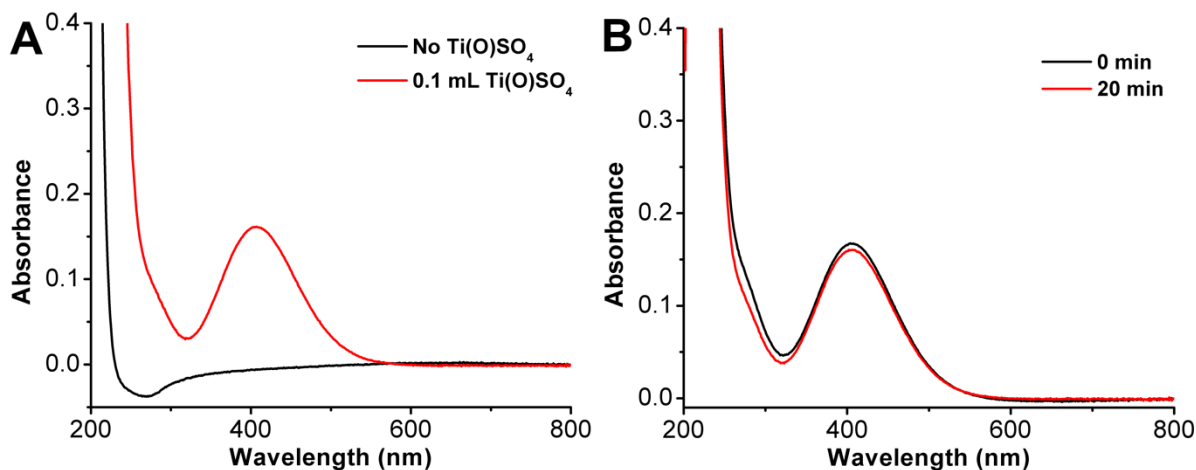

**Figure S29.** Stability test of urea•H<sub>2</sub>O<sub>2</sub> in the presence of Mn(<sup>nPr</sup>dhbpy)Cl **1**, DIPEAHPF<sub>6</sub>, and O<sub>2</sub>. (A) UV-vis spectra of an extracted sample after 20 minutes of reaction time before (black) and after (red) the addition of 0.1 mL of 0.1 M Ti(O)SO<sub>4</sub>. (B) Corrected UV-vis spectra (red – black traces from A) at 0 min (black trace) and after 20 min (red). Conditions: 40 μM Mn(<sup>nPr</sup>dhbpy)Cl, 10 mM DIPEAHPF<sub>6</sub>, 0.80 mM urea•H<sub>2</sub>O<sub>2</sub>, 4.05 mM O<sub>2</sub> in MeCN.

**Table S7.** Summary of H<sub>2</sub>O<sub>2</sub> disproportionation by Mn(<sup>nPr</sup>dhbpy)Cl **2** with 10 mM DIPEAHPF<sub>6</sub> (Figure S29) relative to 0 min with 0.80 mM H<sub>2</sub>O<sub>2</sub>.

| Time (min) | % H <sub>2</sub> O <sub>2</sub> Recovered |
|------------|-------------------------------------------|
| 20         | 93.6 ± 4.6                                |



Buffered Conditions

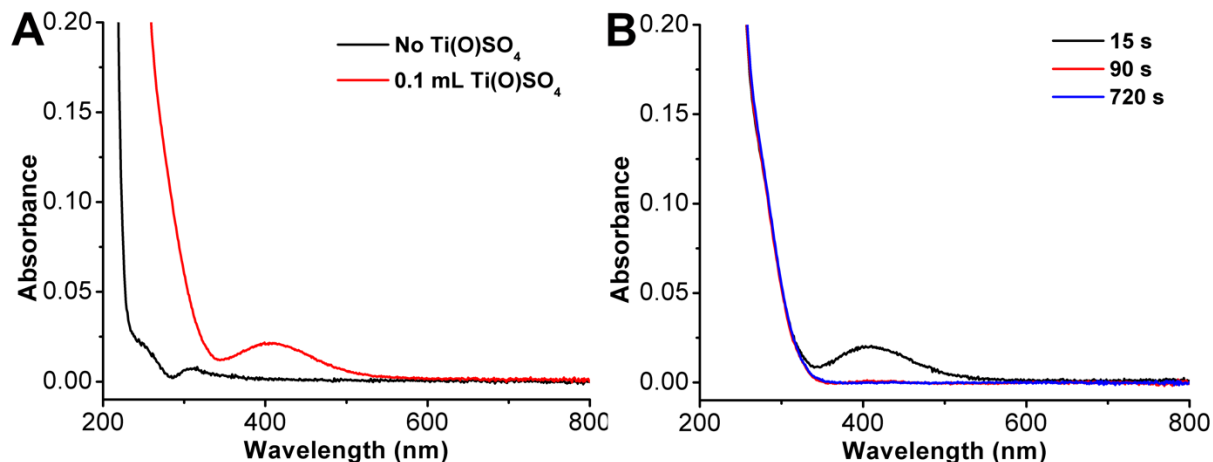

**Figure S30.** H<sub>2</sub>O<sub>2</sub> product quantification of ORR by Mn(<sup>p-tbu</sup>dhbpy)Cl **1** with DIPEAHPF<sub>6</sub> and DIPEA. (A) UV-vis spectrum of extracted solution before (black) and after (red) 0.1 mL of 0.1 M Ti(O)SO<sub>4</sub> solution was added, 15 s. (B) Corrected spectra (red – black trace from A) for 15, 90, and 720 s aliquots. Conditions: 40 μM Mn(<sup>p-tbu</sup>dhbpy)Cl, 10 mM DIPEAHPF<sub>6</sub>/DIPEA, 1 mM Cp\*<sub>2</sub>Fe, 4.05 mM O<sub>2</sub> in MeCN.

**Table S8.** Summary of H<sub>2</sub>O<sub>2</sub> selectivity over the course of catalytic ORR by Mn(<sup>p-tbu</sup>dhbpy)Cl **1** with 10 mM DIPEAHPF<sub>6</sub>/DIPEA (**Figure S30**).

| Time (s) | % H <sub>2</sub> O <sub>2</sub> | % H <sub>2</sub> O |
|----------|---------------------------------|--------------------|
| 15       | 18.1 ± 4.1                      | 81.9 ± 4.1         |
| 90       | -1.32 ± 2.4                     | 101 ± 2.4          |
| 720      | -2.08 ± 1.1                     | 102 ± 1.1          |

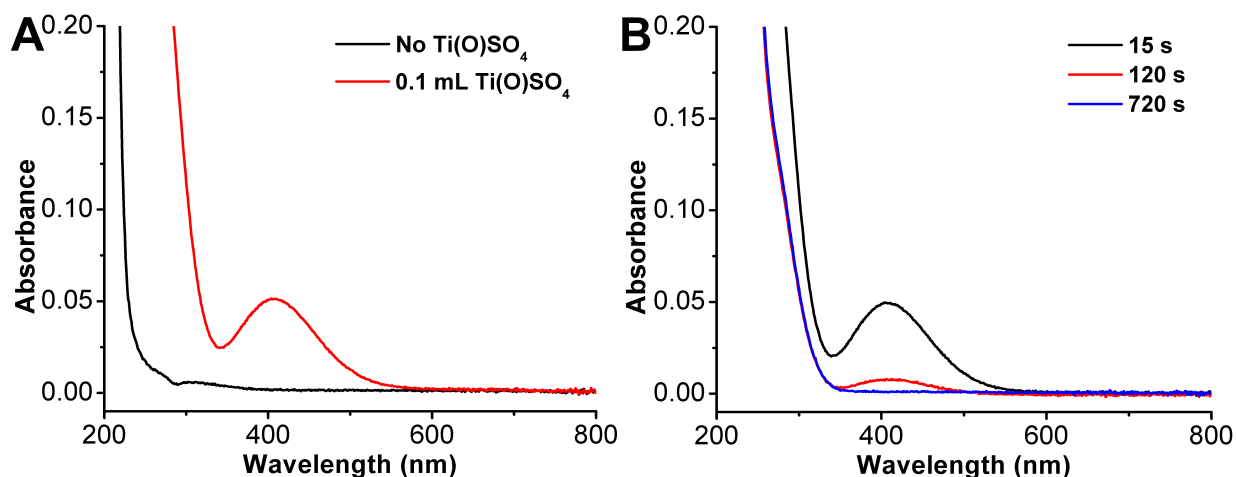

**Figure S31.** H<sub>2</sub>O<sub>2</sub> product quantification of ORR by Mn(<sup>nPr</sup>dhbpy)Cl **2** with DIPEAHPF<sub>6</sub> and DIPEA. (A) UV-vis spectra of extracted solution before (black) and after (red) 0.1 mL of 0.1 M Ti(O)SO<sub>4</sub> solution was added, 15 s. (B) Corrected spectra (red – black trace from A) for 15, 120, and 720 s aliquots. Conditions: 40 μM Mn(<sup>nPr</sup>dhbpy)Cl, 10 mM DIPEAHPF<sub>6</sub>/DIPEA, 1 mM Cp\*<sub>2</sub>Fe, 4.05 mM O<sub>2</sub> in MeCN.

**Table S9.** Summary of H<sub>2</sub>O<sub>2</sub> selectivity over the course of catalytic ORR by Mn(<sup>nPr</sup>dhbpy)Cl **2** with 10 mM DIPEAHPF<sub>6</sub>/DIPEA (**Figure S31**).

| Time (s) | % H <sub>2</sub> O <sub>2</sub> | % H <sub>2</sub> O |
|----------|---------------------------------|--------------------|
| 15       | 37.9 ± 6.7                      | 62.1 ± 6.7         |
| 120      | 6.42 ± 1.8                      | 93.6 ± 1.8         |
| 720      | -3.79 ± 1.2                     | 103 ± 1.2          |

### H<sub>2</sub>O<sub>2</sub> Stability Testing under Buffered Conditions

To determine the stability of H<sub>2</sub>O<sub>2</sub> under catalytic conditions, control studies were conducted in the presence of Mn catalyst, DIPEAHPF<sub>6</sub>, DIPEA, and O<sub>2</sub>. Generally, solutions containing 80 μM Mn catalyst and 20 mM DIPEAHPF<sub>6</sub> and DIPEA (if present) were sparged with O<sub>2</sub> gas and rapidly mixed in a 1:1 ratio with a N<sub>2</sub> saturated urea•H<sub>2</sub>O<sub>2</sub> solution (final concentrations: 40 μM Mn, 10 mM DIPEAHPF<sub>6</sub> and 10 mM DIPEA). As the solution was allowed to react 2 mL aliquots were removed, extracted with 10 mL DCM and 5 mL DI H<sub>2</sub>O. Then, 3 mL of the aqueous layer was removed and added to the cuvette. A UV-vis spectrum was taken before and after the addition of 0.1 mL of 0.1 M Ti(O)SO<sub>4</sub> solution and the difference at 408 nm was used to determine the amount of H<sub>2</sub>O<sub>2</sub> present ([H<sub>2</sub>O<sub>2</sub>]<sub>detected</sub>). The % recovery was determined according to **Eq S10** from measured [H<sub>2</sub>O<sub>2</sub>]<sub>expected</sub> of the H<sub>2</sub>O<sub>2</sub> stock solution or time point 0 min using the described extraction method.

$$\frac{[H_2O_2]_{detected}}{[H_2O_2]_{expected}} \times 100 = \% H_2O_2 \text{ recovery} \quad \text{Eq S10}$$

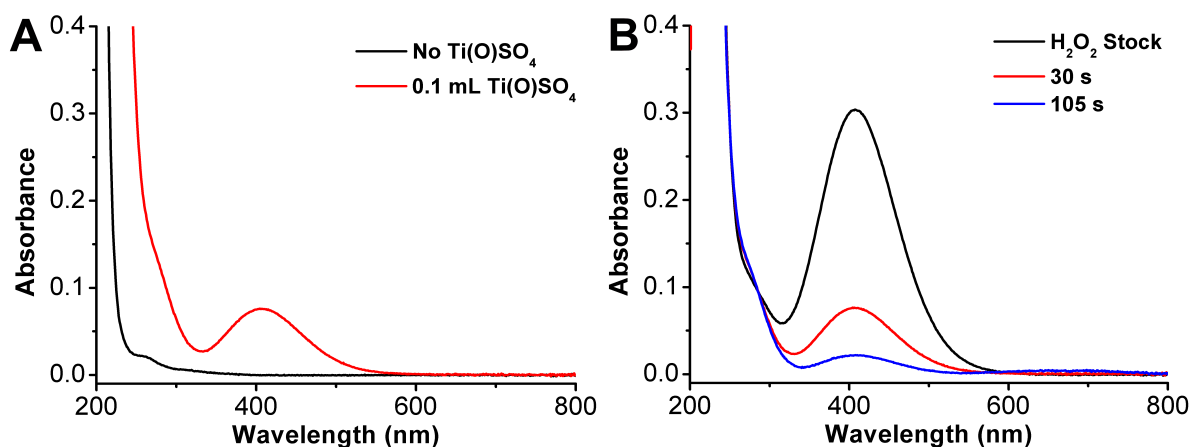

**Figure S32.** Stability test of urea•H<sub>2</sub>O<sub>2</sub> in the presence of Mn(<sup>p-tbu</sup>dhbpy)Cl **1**, DIPEAHPF<sub>6</sub>, DIPEA, and O<sub>2</sub>. (A) UV-vis spectra before (black) and after (red) the addition of 0.1 mL of 0.1 M Ti(O)SO<sub>4</sub> to an extracted aliquot after 30 s. (B) Corrected UV-vis spectra (red – black traces) of H<sub>2</sub>O<sub>2</sub> only (black) and after 30 (red) and 105 s (blue). Conditions: 40 μM Mn(<sup>p-tbu</sup>dhbpy)Cl, 10 mM DIPEAHPF<sub>6</sub>/DIPEA, 1.49 mM urea•H<sub>2</sub>O<sub>2</sub>, 4.05 mM O<sub>2</sub> in MeCN.

**Table S10.** Summary of H<sub>2</sub>O<sub>2</sub> disproportionation by Mn(<sup>p-tbu</sup>dhbpy)Cl **1** with 10 mM DIPEAHPF<sub>6</sub>/DIPEA (**Figure S32**) relative to 1.49 mM H<sub>2</sub>O<sub>2</sub> stock solution.

| Time (s) | % H <sub>2</sub> O <sub>2</sub> Recovered |
|----------|-------------------------------------------|
| 30       | 31.3 ± 5.2                                |
| 105      | 10.8 ± 6.6                                |

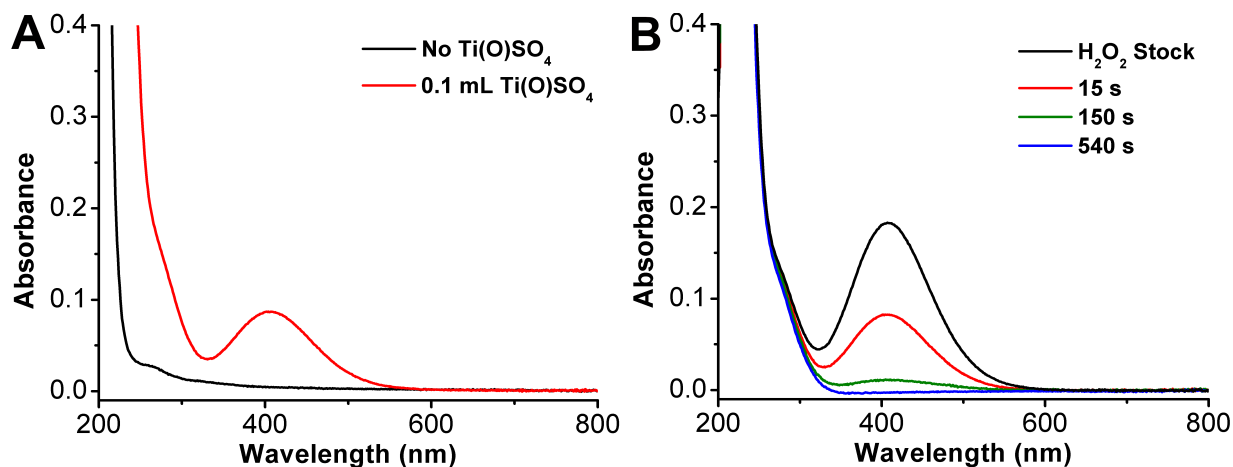

**Figure S33.** Stability test of urea•H<sub>2</sub>O<sub>2</sub> in the presence of Mn(<sup>n</sup>Pr<sub>3</sub>dcbpy)Cl **2**, DIPEAHPF<sub>6</sub>, DIPEA, and O<sub>2</sub>. (A) UV-vis spectra before (black) and after (red) the addition of 0.1 mL of 0.1 M Ti(O)SO<sub>4</sub> to an extracted aliquot after 15 s. (B) Corrected UV-vis spectra (red – black trace from A) of H<sub>2</sub>O<sub>2</sub> only (black) and after 15 (red), 150 (green), and 540 s (blue). Conditions: 40 μM Mn(<sup>n</sup>Pr<sub>3</sub>dcbpy)Cl, 10 mM DIPEAHPF<sub>6</sub>/DIPEA, 0.89 mM urea•H<sub>2</sub>O<sub>2</sub>, 4.05 mM O<sub>2</sub> in MeCN.

**Table S11.** Summary of H<sub>2</sub>O<sub>2</sub> disproportionation by Mn(<sup>n</sup>Pr<sub>3</sub>dcbpy)Cl **2** with 10 mM DIPEAHPF<sub>6</sub>/DIPEA (**Figure S33**) relative to 0.89 mM H<sub>2</sub>O<sub>2</sub> stock solution.

| Time (s) | % H <sub>2</sub> O <sub>2</sub> Recovered |
|----------|-------------------------------------------|
| 15       | 43.9 ± 4.9                                |
| 150      | 3.81 ± 0.83                               |
| 540      | -3.14 ± 1.0                               |

To determine the stability of H<sub>2</sub>O<sub>2</sub> in the presence of Mn(II), control studies were conducted in the presence of Mn, DIPEAHPF<sub>6</sub>, DIPEA, Cp\*<sub>2</sub>Fe, under an N<sub>2</sub> atmosphere. In a N<sub>2</sub> filled glovebox, urea•H<sub>2</sub>O<sub>2</sub> was added to a solution containing Mn, DIPEAHPF<sub>6</sub>/DIPEA, and Cp\*<sub>2</sub>Fe (final concentrations: 40 μM Mn, 10 mM DIPEAHPF<sub>6</sub>/DIPEA, 1 mM Cp\*<sub>2</sub>Fe, 2.3 mM urea•H<sub>2</sub>O<sub>2</sub>). After 30 s, 2 min and 9 min, 2 mL aliquots were removed from the 'catalytic' solution and extracted with 10 mL of dry, degassed DCM and 5 mL of degassed water. Then, 3 mL of the aqueous layer was removed and a UV-vis spectrum was taken before and after the addition of 0.1 mL of Ti(O)SO<sub>4</sub> solution. The difference in absorbance at 408 nm was used to quantify the amount of H<sub>2</sub>O<sub>2</sub> present according to **Eq S9** and **Eq S10** was used to determine the amount of H<sub>2</sub>O<sub>2</sub> recovered.

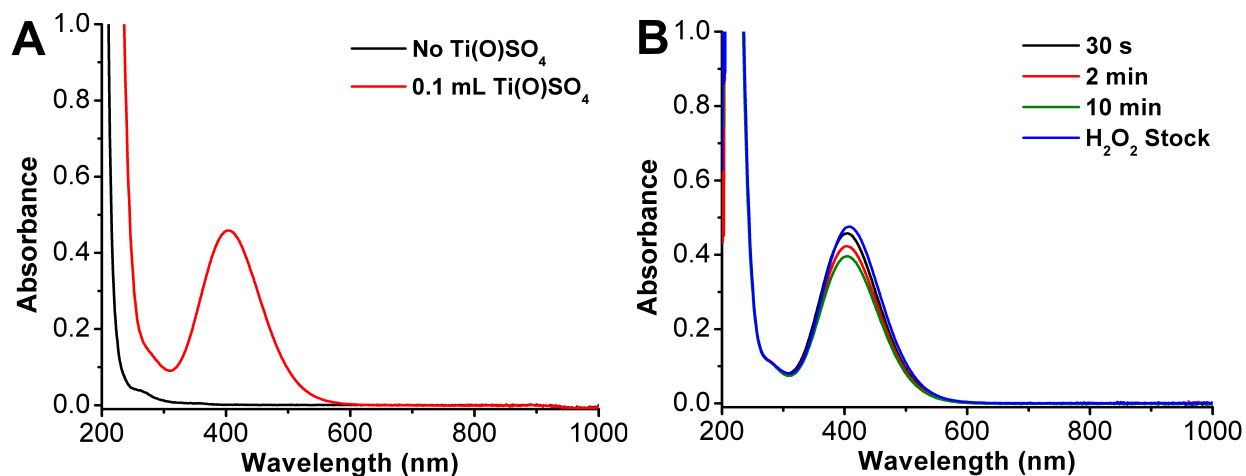

**Figure S34.** Stability test of urea•H<sub>2</sub>O<sub>2</sub> in the presence of Mn(<sup>p-tbu</sup>dhbpy)Cl **1**, DIPEAHPF<sub>6</sub>, DIPEA, and FeCp\*<sub>2</sub> (A) before (black trace) and after (red trace) the addition of 0.1 mL of 0.1 M Ti(O)SO<sub>4</sub> to an extracted aliquot after 30 s. (B) Corrected UV-vis spectra (red – black from A) after 30 s (black), 120 s (red), 600 s (green), and H<sub>2</sub>O<sub>2</sub> only (blue). Conditions: 40 μM Mn(<sup>p-tbu</sup>dhbpy)Cl, 10 mM DIPEAHPF<sub>6</sub>/DIPEA, 2.3 mM urea•H<sub>2</sub>O<sub>2</sub>, 1 mM FeCp\*<sub>2</sub> in MeCN.

**Table S12.** Summary of H<sub>2</sub>O<sub>2</sub>RR by Mn(<sup>p-tbu</sup>dhbpy)Cl **1** with 10 mM DIPEAHPF<sub>6</sub>/DIPEA and 1 mM FeCp\*<sub>2</sub> (Figure S34) relative to 2.3 mM H<sub>2</sub>O<sub>2</sub> stock solution.

| Time (s) | % H <sub>2</sub> O <sub>2</sub> Recovered |
|----------|-------------------------------------------|
| 30       | 94.1 ± 2.3                                |
| 120      | 88.3 ± 1.9                                |
| 540      | 82.9 ± 2.2                                |

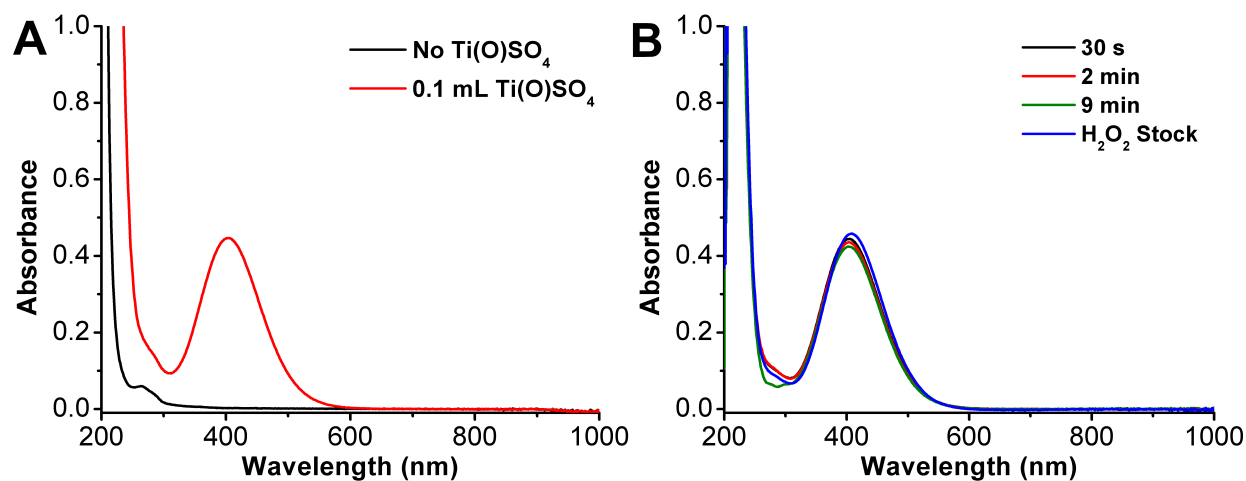

**Figure S35.** Stability test of urea•H<sub>2</sub>O<sub>2</sub> in the presence of Mn(<sup>nPr</sup>dhbpy)Cl **2**, DIPEAHPF<sub>6</sub>, DIPEA, and FeCp\*<sub>2</sub> (A) before (black trace) and after (red trace) the addition of 0.1 mL of 0.1 M Ti(O)SO<sub>4</sub> to an extracted aliquot after 30 s. (B) Corrected UV-vis spectra (red – black from A) after 30 s (black), 120 s (red), 600 s (green), and H<sub>2</sub>O<sub>2</sub> only (blue). Conditions: 40 μM Mn(<sup>nPr</sup>dhbpy)Cl, 10 mM DIPEAHPF<sub>6</sub>/DIPEA, 2.3 mM urea•H<sub>2</sub>O<sub>2</sub>, 1 mM FeCp\*<sub>2</sub> in MeCN.

**Table S13.** Summary of H<sub>2</sub>O<sub>2</sub>RR by Mn(<sup>nPr</sup>dhbpy)Cl **2** with 10 mM DIPEAHPF<sub>6</sub>/DIPEA and 1 mM FeCp\*<sub>2</sub> (Figure S35) relative to 2.3 mM H<sub>2</sub>O<sub>2</sub> stock solution.

| Time (s) | % H <sub>2</sub> O <sub>2</sub> Recovered |
|----------|-------------------------------------------|
| 30       | 88.5 ± 1.2                                |
| 120      | 91.1 ± 3.6                                |
| 540      | 86.5 ± 4.5                                |

**Stopped-Flow Spectrochemical Methods.** Stopped-flow spectrochemical kinetics studies were performed with a CSF-61DX2 Stopped-Flow System from Hi-Tech Scientific. Kinetic Studio Software was used to monitor a single wavelength and Integrated CCD Software was used to monitor the entire visible spectrum. All data fits were performed within the Kinetic Studio 4.0 Software Suite. Prior to experiments, dried and degassed MeCN was passed through syringes and the cell block before reagents were loaded. In a typical experiment, syringes would be charged with known concentrations of reagent. All reagent solutions were prepared immediately before use.

In general, a vial containing Mn catalyst and proton source (and conjugate base, if present) was sparged with O<sub>2</sub>, drawn into a syringe and loaded into the stopped-flow. A second syringe containing N<sub>2</sub>-saturated Cp\*<sub>2</sub>Fe solution loaded into the stopped-flow. All reported concentrations are the mixed concentrations in the spectroscopic cell.

*Determination of the Rate Law for ORR by 1 under Unbuffered Conditions*

$$\text{rate} = k_{\text{cat}}[\text{Mn}^{\text{p-tbu}}]^{1}[\text{O}_2]^{1} \quad \text{Eq S11}$$

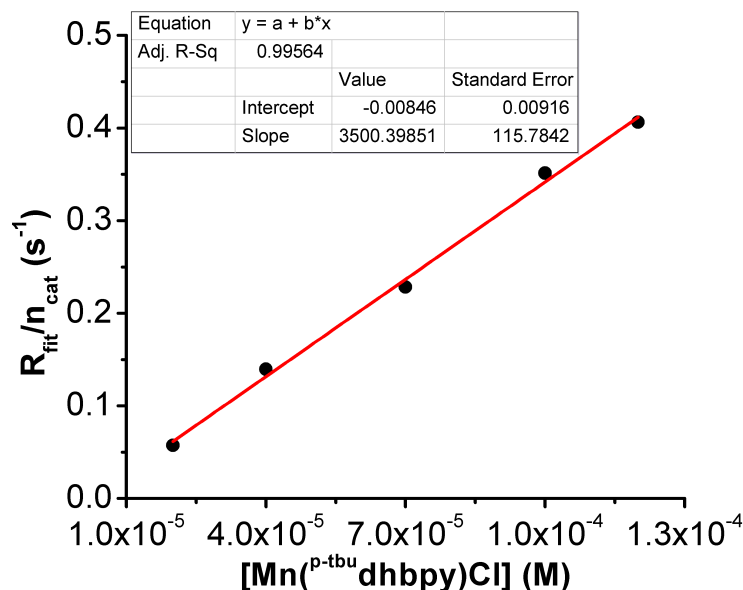

**Figure S36.** The calculated  $R_{\text{fit}}/n_{\text{cat}}$  values from stopped-flow spectrochemical experiments with DIPEAHPF<sub>6</sub>, O<sub>2</sub>, and Cp\*<sub>2</sub>Fe with varying Mn(<sup>p-tbu</sup>dhbpy)Cl **1** concentration. Data were fit using Kinetic Studio 4.0 (1Exp+Mx+C),  $n_{\text{cat}} = 2.72$ . Concentrations: DIPEAHPF<sub>6</sub> = 10 mM, O<sub>2</sub> = 4.05 mM, Cp\*<sub>2</sub>Fe = 1 mM.

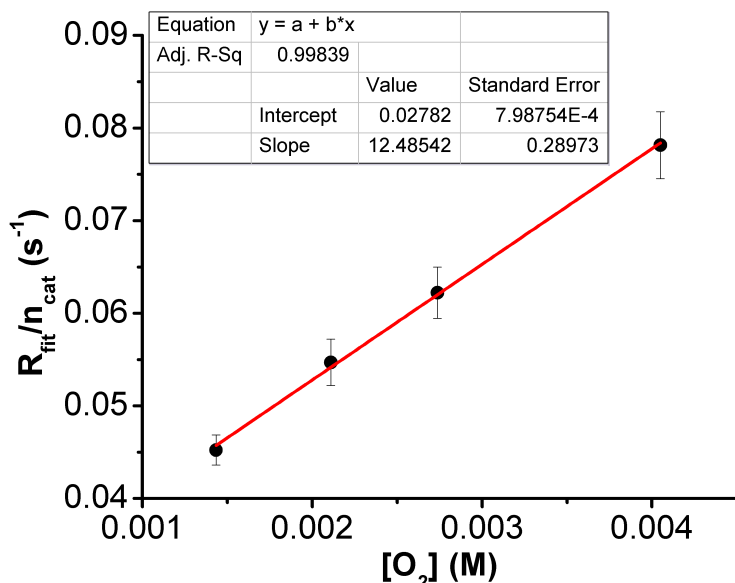

**Figure S37.** The calculated  $R_{\text{fit}}/n_{\text{cat}}$  values from stopped-flow spectrochemical experiments with  $\text{Mn}(\text{p-}^{\text{t}}\text{bu}^{\text{d}}\text{hbpy})\text{Cl}$  **1**,  $\text{DIPEAHPF}_6$ , and  $\text{Cp}^*_2\text{Fe}$  with varying  $\text{O}_2$  concentration. Data were fit using Kinetic Studio 4.0 (1Exp+Mx+C),  $n_{\text{cat}} = 2.72$ . Concentrations:  $\text{Mn}(\text{p-}^{\text{t}}\text{bu}^{\text{d}}\text{hbpy})\text{Cl} = 40 \mu\text{M}$ ,  $\text{DIPEAHPF}_6 = 10 \text{ mM}$ ,  $\text{Cp}^*_2\text{Fe} = 1 \text{ mM}$ .

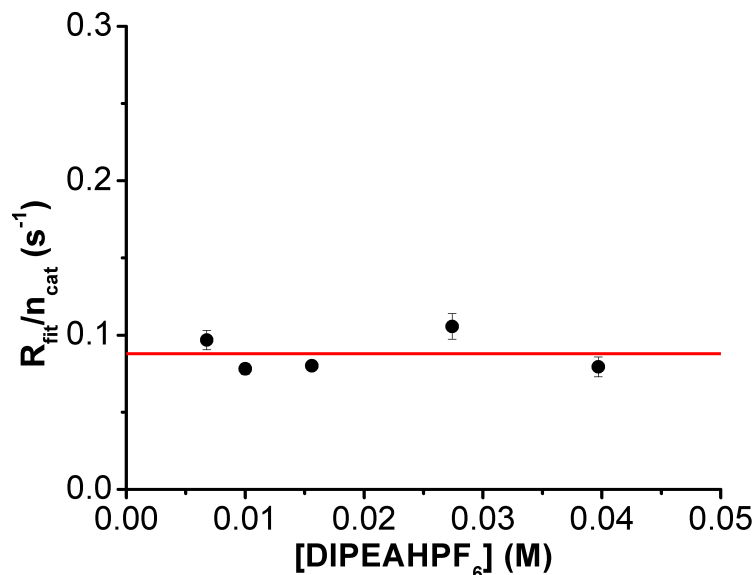

**Figure S38.** The calculated  $R_{\text{fit}}/n_{\text{cat}}$  values from stopped-flow spectrochemical experiments with  $\text{Mn}(\text{p-}^{\text{t}}\text{bu}^{\text{d}}\text{hbpy})\text{Cl}$  **1**,  $\text{O}_2$ , and  $\text{Cp}^*_2\text{Fe}$  with varying  $\text{DIPEAHPF}_6$  concentration. Data were fit using Kinetic Studio 4.0 (1Exp+Mx+C),  $n_{\text{cat}} = 2.72$ . The red line represents the global average over all points. Concentrations:  $\text{Mn}(\text{p-}^{\text{t}}\text{bu}^{\text{d}}\text{hbpy})\text{Cl} = 40 \mu\text{M}$ ,  $\text{O}_2 = 4.05 \text{ mM}$ ,  $\text{Cp}^*_2\text{Fe} = 1 \text{ mM}$ .

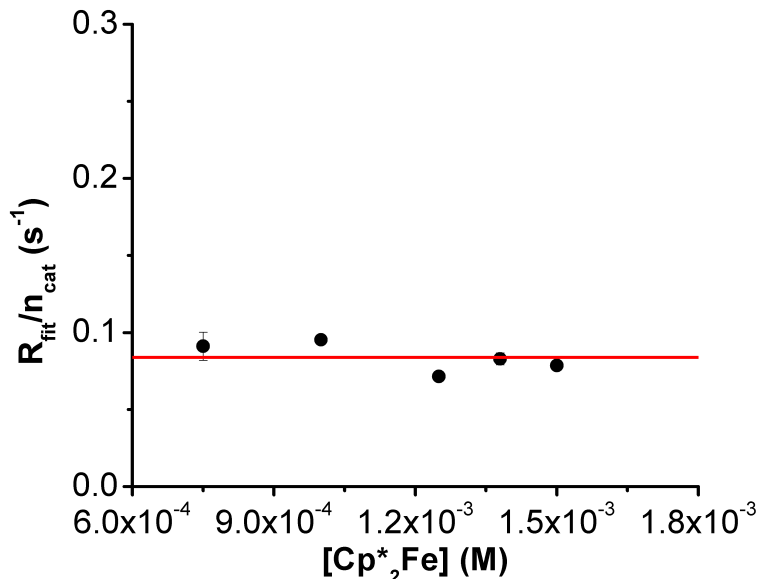

**Figure S39.** The calculated  $R_{\text{fit}}/n_{\text{cat}}$  values from stopped-flow spectrochemical experiments with  $\text{Mn}^{(p\text{-}t\text{bu})\text{dhbpy}}\text{Cl}$  **1**,  $\text{O}_2$ , and  $\text{DIPEAHPF}_6$  with varying  $\text{Cp}^*_2\text{Fe}$  concentration. Data were fit using Kinetic Studio 4.0 (1Exp+Mx+C),  $n_{\text{cat}} = 2.72$ . The red line represents the global average over all points. Concentrations:  $\text{Mn}^{(p\text{-}t\text{bu})\text{dhbpy}}\text{Cl} = 40 \mu\text{M}$ ,  $\text{O}_2 = 4.05 \text{ mM}$ ,  $\text{DIPEAHPF}_6 = 10 \text{ mM}$ .

*Determination of the Rate Law of ORR by 1 under Buffered Conditions*

$$\text{rate} = k_{\text{cat}}[\text{Mn}^{p\text{-}t\text{bu}}]^1[\text{O}_2]^1 \quad \text{Eq S12}$$

Comparable  $k_{\text{obs}}$  values can be obtained from the average of  $R_{\text{fit}}/n_{\text{cat}}$  values across independent experimental data points at identical conditions:  $40 \mu\text{M}$   $[\text{Mn}]$ ,  $10 \text{ mM}$   $[\text{DIPEAHPF}_6/\text{DIPEA}]$ ,  $4.05 \text{ mM}$   $[\text{O}_2]$ , and  $1 \text{ mM}$   $[\text{Cp}^*_2\text{Fe}]$  (**Figures S40–S44**).

$$k_{\text{obs}} = 1.23 \pm 0.17 \times 10^{-1} \text{ s}^{-1}$$

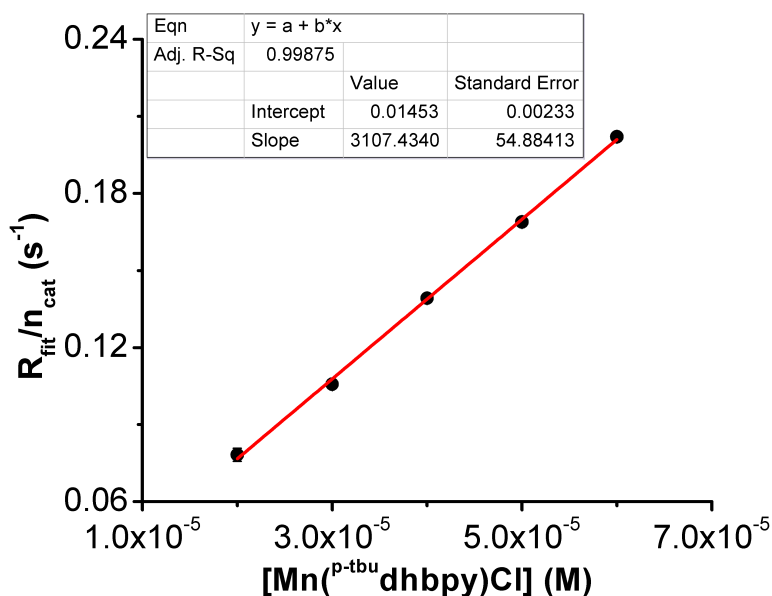

**Figure S40.** The calculated  $R_{\text{fit}}/n_{\text{cat}}$  values from stopped-flow spectrochemical experiments with DIPEAHPF<sub>6</sub>, DIPEA, O<sub>2</sub>, and Cp\*<sub>2</sub>Fe with varying Mn(p-tbu)dhbpy)Cl **1** concentration. Data were fit using Kinetic Studio 4.0 (1Exp+Mx+C),  $n_{\text{cat}} = 3.64$ . Concentrations: DIPEAHPF<sub>6</sub>/DIPEA = 10 mM, O<sub>2</sub> = 4.05 mM, Cp\*<sub>2</sub>Fe = 1 mM.

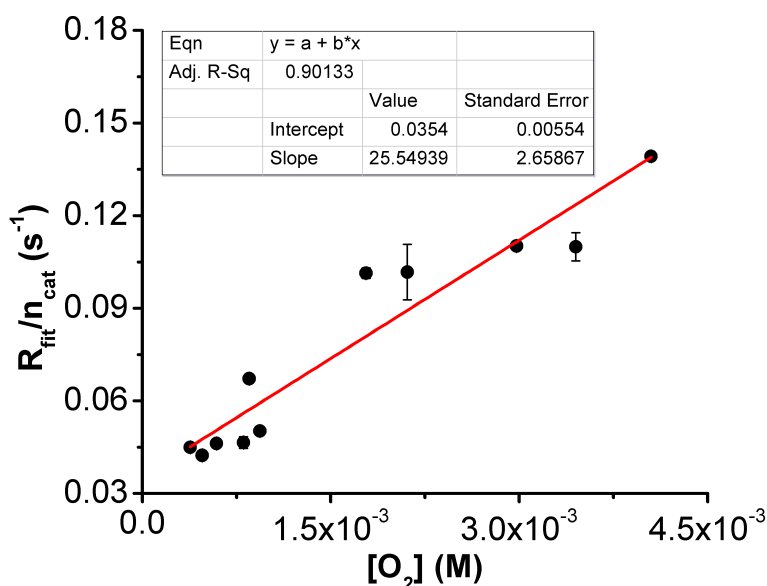

**Figure S41.** The calculated  $R_{\text{fit}}/n_{\text{cat}}$  values from stopped-flow spectrochemical experiments with Mn(p-tbu)dhbpy)Cl **1**, DIPEAHPF<sub>6</sub>, DIPEA, and Cp\*<sub>2</sub>Fe with varying O<sub>2</sub> concentration. Data were fit using Kinetic Studio 4.0 (1Exp+Mx+C),  $n_{\text{cat}} = 3.64$ . Concentrations: Mn(p-tbu)dhbpy)Cl = 40  $\mu$ M, DIPEAHPF<sub>6</sub>/DIPEA = 10 mM, Cp\*<sub>2</sub>Fe = 1 mM.



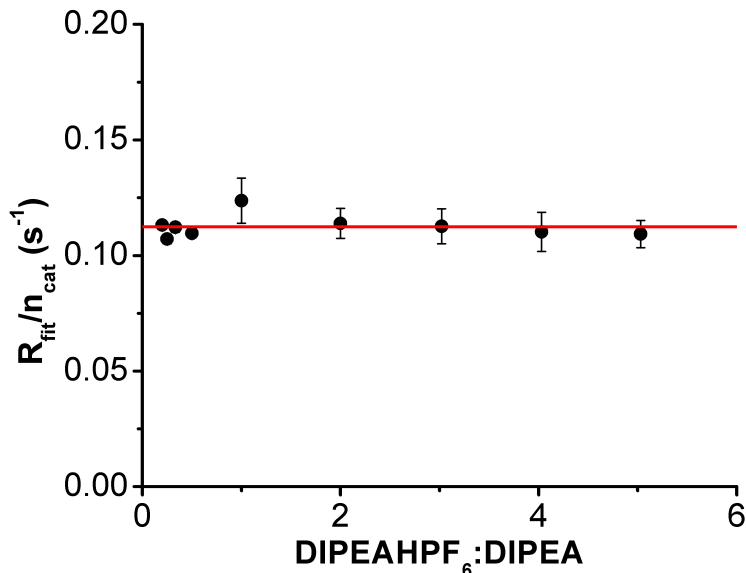

**Figure S42.** The calculated  $R_{\text{fit}}/n_{\text{cat}}$  values from stopped-flow spectrochemical experiments with  $\text{Mn}^{(\text{p-tbu})\text{dhbpy}}\text{Cl}$  **1**,  $\text{O}_2$ , DIPEA, and  $\text{Cp}^*\text{Fe}$  with varying DIPEAHPF<sub>6</sub>:DIPEA ratio. Data were fit using Kinetic Studio 4.0 (1Exp+Mx+C). The red line represents the global average over all points,  $n_{\text{cat}} = 3.64$ . Concentrations:  $\text{Mn}^{(\text{p-tbu})\text{dhbpy}}\text{Cl} = 40 \mu\text{M}$ , DIPEA = 10 mM,  $\text{O}_2 = 4.05 \text{ mM}$ ,  $\text{Cp}^*\text{Fe} = 1 \text{ mM}$ ; 1:1 DIPEAHPF<sub>6</sub>:DIPEA = 10 mM of each and all concentrations are relative to this point.

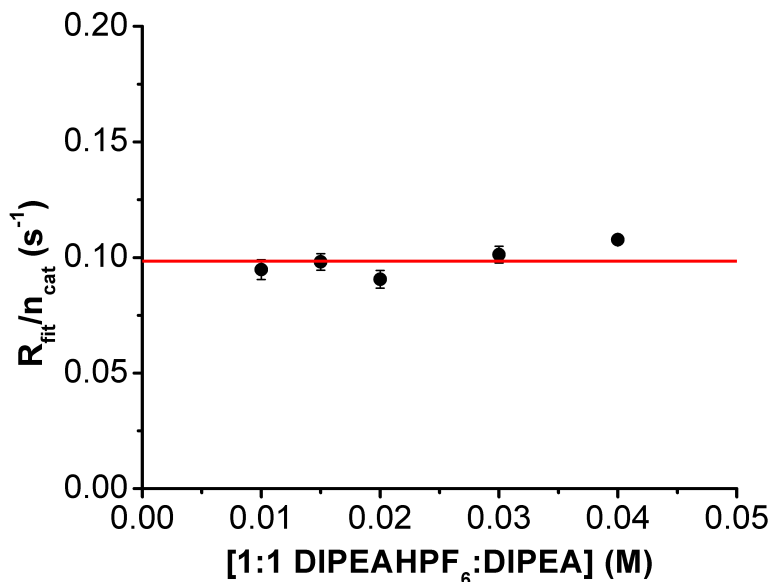

**Figure S43.** The calculated  $R_{\text{fit}}/n_{\text{cat}}$  values from stopped-flow spectrochemical experiments with  $\text{Mn}^{(\text{p-tbu})\text{dhbpy}}\text{Cl}$  **1**,  $\text{O}_2$ , and  $\text{Cp}^*\text{Fe}$  with varying buffer (DIPEAHPF<sub>6</sub> and DIPEA, 1:1 ratio) concentration. Data were fit using Kinetic Studio 4.0 (1Exp+Mx+C). The red line represents the global average over all points,  $n_{\text{cat}} = 3.64$ . Concentrations:  $\text{Mn}^{(\text{p-tbu})\text{dhbpy}}\text{Cl} = 40 \mu\text{M}$ ,  $\text{O}_2 = 4.05 \text{ mM}$ ,  $\text{Cp}^*\text{Fe} = 1 \text{ mM}$ .

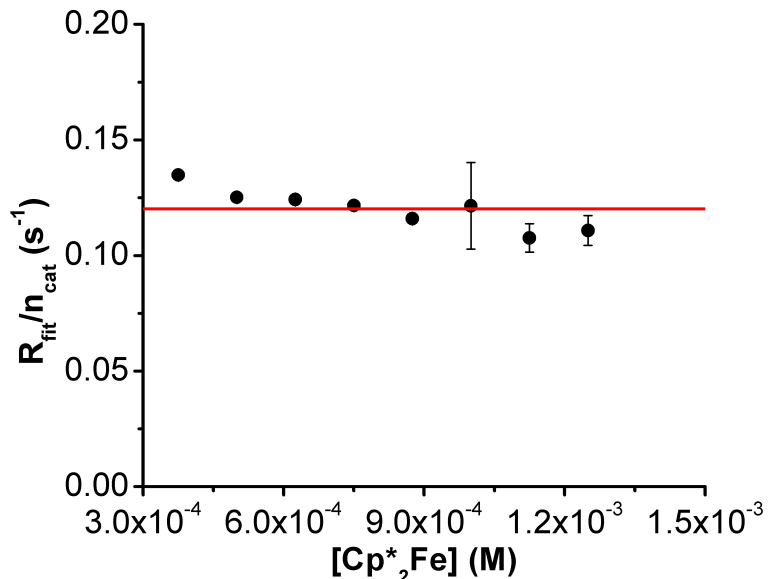

**Figure S44.** The calculated  $R_{\text{fit}}/n_{\text{cat}}$  values from stopped-flow spectrochemical experiments with  $\text{Mn}^{(\text{p-tbu})\text{dhbpy}}\text{Cl}$  **1**,  $\text{DIPEAHPF}_6$ ,  $\text{DIPEA}$ , and  $\text{O}_2$  with varying  $\text{Cp}^*_2\text{Fe}$  concentration. Data were fit using Kinetic Studio 4.0 (1Exp+Mx+C). The red line represents the global average over all points,  $n_{\text{cat}} = 3.64$ . Concentrations:  $\text{Mn}^{(\text{p-tbu})\text{dhbpy}}\text{Cl} = 40 \mu\text{M}$ ,  $\text{O}_2 = 4.05 \text{ mM}$ ,  $\text{DIPEAHPF}_6/\text{DIPEA} = 10 \text{ mM}$ .

*Determination of Rate Law of ORR by 2 under Unbuffered Conditions*

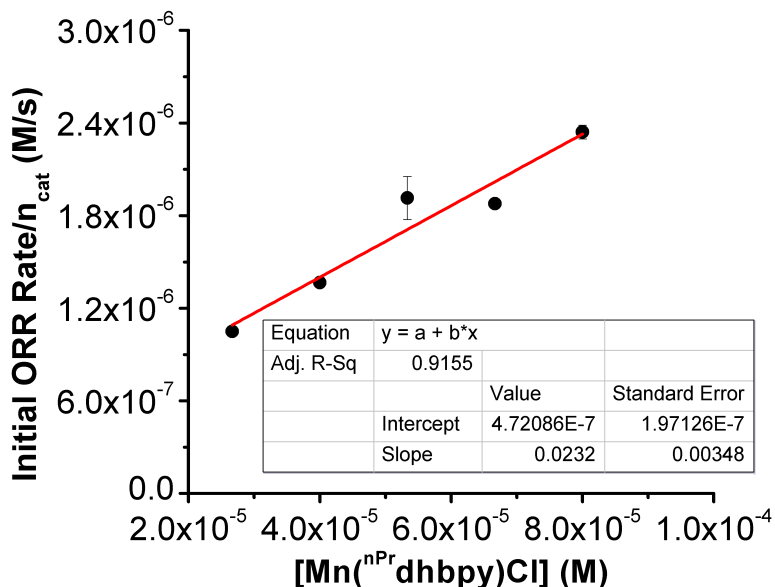

**Figure S45.** The calculated initial ORR rate from stopped-flow spectrochemical experiments with  $\text{DIPEAHPF}_6$ ,  $\text{O}_2$ ,  $\text{Cp}^*_2\text{Fe}$  with varying  $\text{Mn}^{(\text{nPr})\text{dhbpy}}\text{Cl}$  **2** concentration. Data were fit using Kinetic Studio 4.0 (Linear) correcting for the concentration of  $\text{Cp}^*_2\text{Fe}$  and  $n_{\text{cat}} = 2.08$ . Concentrations:  $\text{DIPEAHPF}_6 = 10 \text{ mM}$ ,  $\text{O}_2 = 4.05 \text{ mM}$ , and  $\text{Cp}^*_2\text{Fe} = 1 \text{ mM}$ .

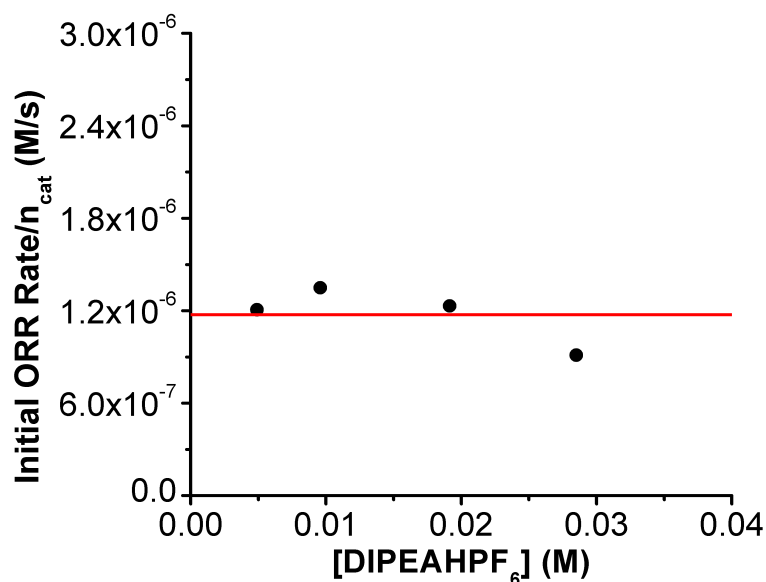

**Figure S46.** The calculated initial ORR rate from stopped-flow spectrochemical experiments with, Mn(<sup>n</sup>Pr<sup>d</sup>hbpy)Cl **2**, O<sub>2</sub>, Cp\*<sub>2</sub>Fe with varying DIPEAHPF<sub>6</sub> concentration. Data were fit using Kinetic Studio 4.0 (Linear) correcting for the concentration of Cp\*<sub>2</sub>Fe and n<sub>cat</sub> = 2.08. Concentrations: Mn(<sup>n</sup>Pr<sup>d</sup>hbpy)Cl = 40 μM, O<sub>2</sub> = 4.05 mM, and Cp\*<sub>2</sub>Fe = 1 mM.

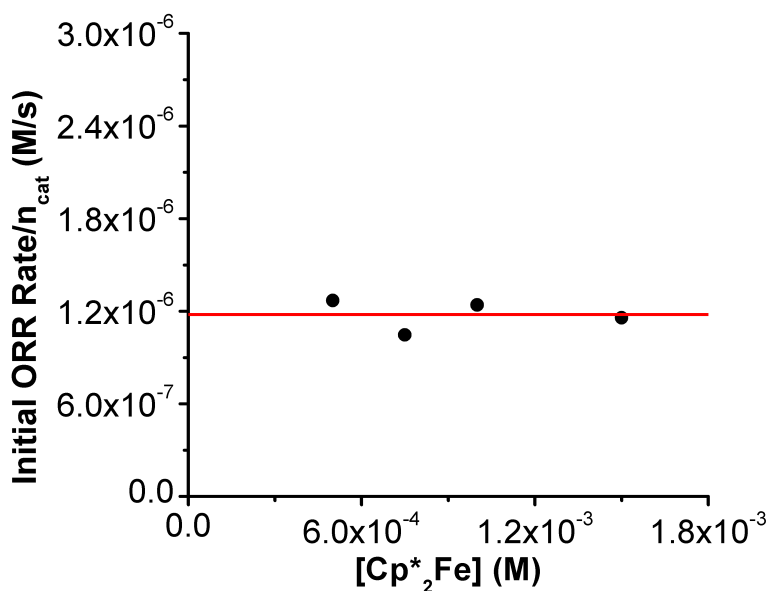

**Figure S47.** The calculated initial ORR rate from stopped-flow spectrochemical experiments with, Mn(<sup>n</sup>Pr<sup>d</sup>hbpy)Cl **2**, DIPEAHPF<sub>6</sub>, O<sub>2</sub>, with varying Cp\*<sub>2</sub>Fe concentration. Data were fit using Kinetic Studio 4.0 (Linear) and correcting for the concentration of Cp\*<sub>2</sub>Fe and n<sub>cat</sub> = 2.08. Concentrations: Mn(<sup>n</sup>Pr<sup>d</sup>hbpy)Cl = 40 μM, O<sub>2</sub> = 4.05 mM, and DIPEAHPF<sub>6</sub> = 10 mM.

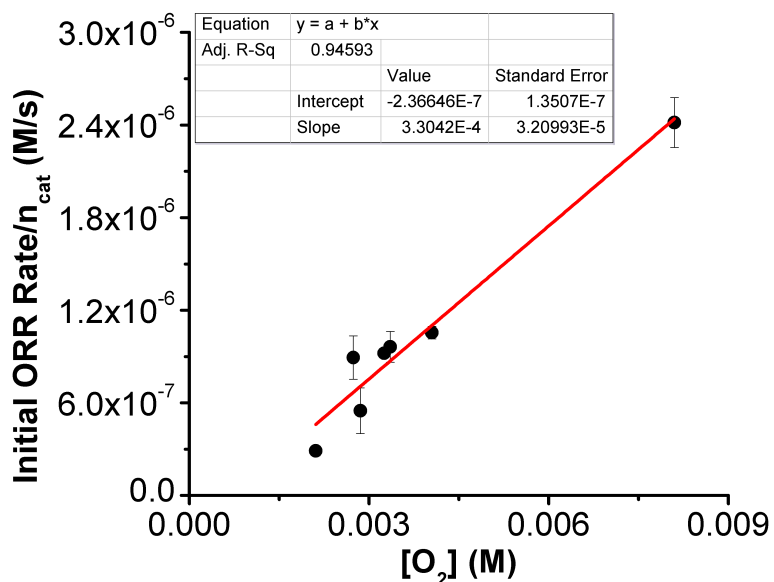

**Figure S48.** The calculated initial ORR rate from stopped-flow spectrochemical experiments with,  $Mn^{(nPr)dhbpy}Cl$  **2**,  $DIPEAHPF_6$ ,  $Cp^*_2Fe$  with varying  $O_2$ , concentration. Data were fit using Kinetic Studio 4.0 (Linear) and correcting for the concentration of  $Cp^*_2Fe$  and  $n_{cat} = 2.08$ . Concentrations:  $Mn^{(nPr)dhbpy}Cl = 40 \mu M$ ,  $O_2 = 4.05 \text{ mM}$ , and  $DIPEAHPF_6 = 10 \text{ mM}$ .

*Determination of Rate Law for ORR by 2 under Buffered Conditions*

$$rate = k_{cat}[Mn^{nPr}]^2[DIPEA]^1[Cp^*_2Fe]^{-1} \quad \text{Eq S13}$$

Comparable  $k_{obs}$  values can be obtained from the average of  $R_{fit}/n_{cat}$  values across independent experimental data points at identical conditions:  $40 \mu M$   $[Mn]$ ,  $10 \text{ mM}$   $[DIPEAHPF_6/DIPEA]$ ,  $4.05 \text{ mM}$   $[O_2]$ , and  $1 \text{ mM}$   $[Cp^*_2Fe]$  (**Figures S49-S53**).

$$k_{obs} = 0.706 \pm 0.25 \times 10^{-1} \text{ s}^{-1}$$

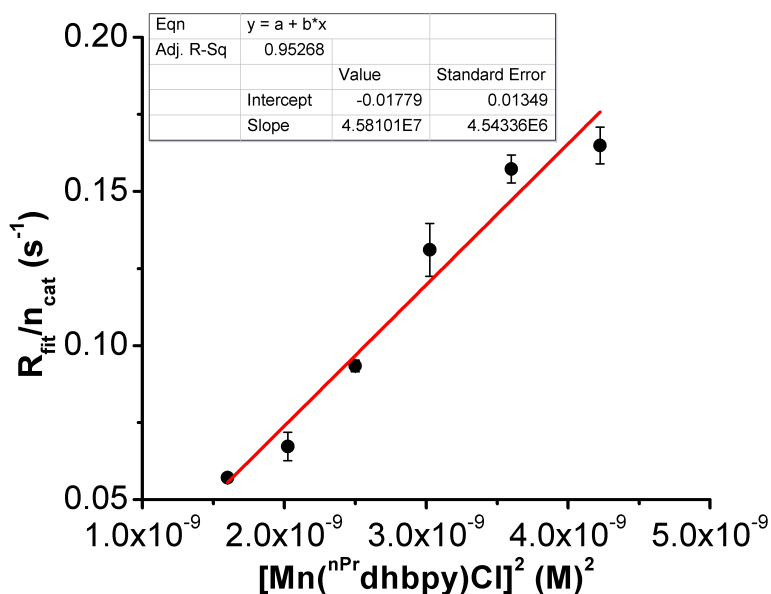

**Figure S49.** The calculated  $R_{\text{fit}}/n_{\text{cat}}$  values from stopped-flow spectrochemical experiments with DIPEAHPF<sub>6</sub>, DIPEA, O<sub>2</sub>, and Cp\*<sub>2</sub>Fe with varying Mn(<sup>n</sup>Pr-dhbpy)Cl **2** concentration. Data were fit using Kinetic Studio 4.0 (1Exp+Mx+C),  $n_{\text{cat}} = 3.24$ . Concentrations: DIPEAHPF<sub>6</sub>/DIPEA = 10 mM, O<sub>2</sub> = 4.05 mM, Cp\*<sub>2</sub>Fe = 1 mM.

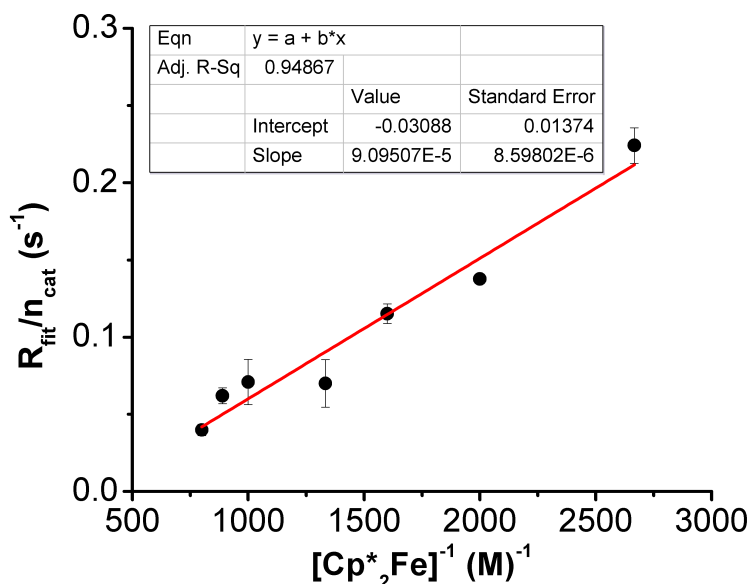

**Figure S50.** The calculated  $R_{\text{fit}}/n_{\text{cat}}$  values from stopped-flow spectrochemical experiments with Mn(<sup>n</sup>Pr-dhbpy)Cl **2**, DIPEAHPF<sub>6</sub>, DIPEA, and O<sub>2</sub> with varying Cp\*<sub>2</sub>Fe concentration. Data were fit using Kinetic Studio 4.0 (1Exp+Mx+C);  $n_{\text{cat}} = 3.24$ . Concentrations: Mn(<sup>n</sup>Pr-dhbpy)Cl = 40 μM, O<sub>2</sub> = 4.05 mM, DIPEAHPF<sub>6</sub>/DIPEA = 10 mM.

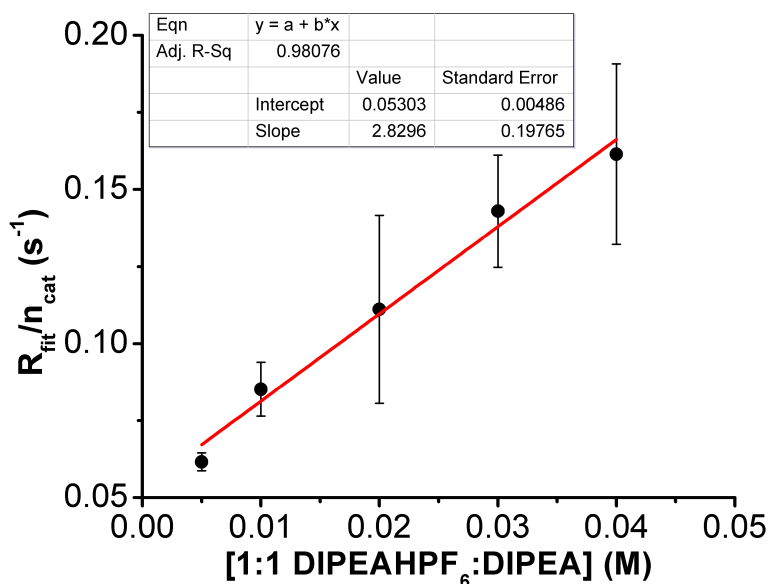

**Figure S51.** The calculated  $R_{\text{fit}}/n_{\text{cat}}$  values from stopped-flow spectrochemical experiments with  $\text{Mn}^{(\text{nPr})\text{d}(\text{h}b\text{py})\text{Cl}}$  **2**,  $\text{O}_2$ , and  $\text{Cp}^*_2\text{Fe}$  with varying buffer (DIPEAHPF<sub>6</sub> and DIPEA, 1:1 ratio) concentration. Data were fit using Kinetic Studio 4.0 (1Exp+Mx+C);  $n_{\text{cat}} = 3.24$ . Concentrations:  $\text{Mn}^{(\text{nPr})\text{d}(\text{h}b\text{py})\text{Cl}} = 40 \mu\text{M}$ ,  $\text{O}_2 = 4.05 \text{ mM}$ ,  $\text{Cp}^*_2\text{Fe} = 1 \text{ mM}$ .

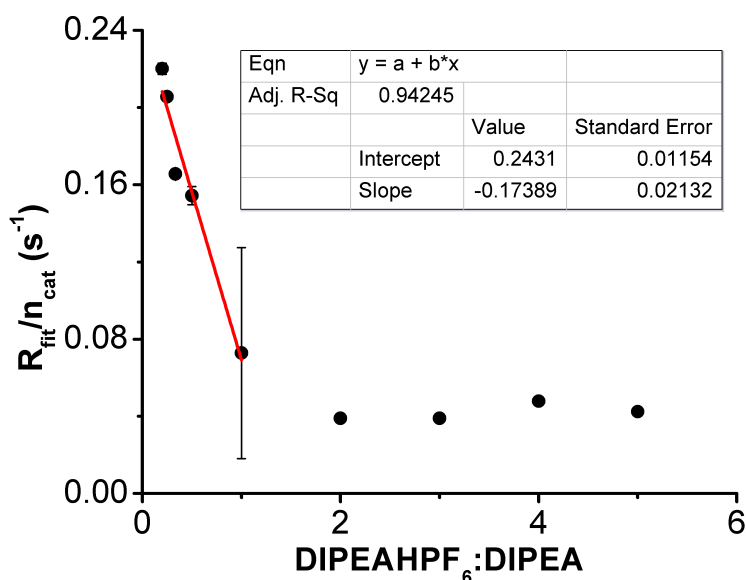

**Figure S52.** The calculated  $R_{\text{fit}}/n_{\text{cat}}$  values from stopped-flow spectrochemical experiments with  $\text{Mn}^{(\text{nPr})\text{d}(\text{h}b\text{py})\text{Cl}}$  **2**,  $\text{O}_2$ , and  $\text{Cp}^*_2\text{Fe}$  with varying DIPEAHPF<sub>6</sub>:DIPEA ratio. Data were fit using Kinetic Studio 4.0 (1Exp+Mx+C);  $n_{\text{cat}} = 3.24$ . Concentrations:  $\text{Mn}^{(\text{p-tbu})\text{d}(\text{h}b\text{py})\text{Cl}} = 40 \mu\text{M}$ ,  $\text{O}_2 = 4.05 \text{ mM}$ , 1:1 DIPEAHPF<sub>6</sub>:DIPEA = 10 mM,  $\text{Cp}^*_2\text{Fe} = 1 \text{ mM}$ ; 1:1 DIPEAHPF<sub>6</sub>:DIPEA = 10 mM and all concentrations are relative to this point.

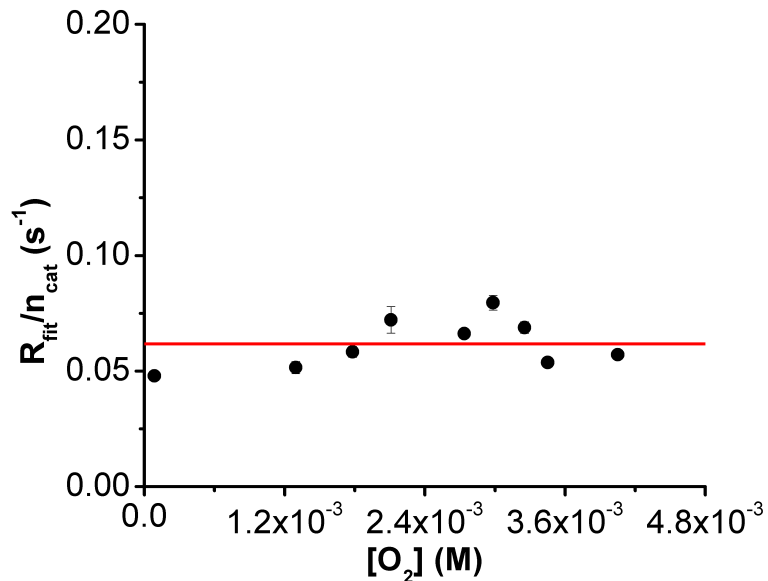

**Figure S53.** The calculated  $R_{\text{fit}}/n_{\text{cat}}$  values from stopped-flow spectrochemical experiments with  $\text{Mn}(\text{}^{\text{nPr}}\text{dhbpy})\text{Cl}$  **2**,  $\text{DIPEAHPF}_6$ ,  $\text{DIPEA}$ , and  $\text{Cp}^*\text{}_2\text{Fe}$  with varying  $\text{O}_2$  concentration. Data were fit using Kinetic Studio 4.0 (1Exp+Mx+C);  $n_{\text{cat}} = 3.24$ . Concentrations:  $\text{Mn}(\text{}^{\text{nPr}}\text{Cdhbpy})\text{Cl} = 40 \mu\text{M}$ ,  $\text{DIPEAHPF}_6 = 10 \text{ mM}$ ,  $\text{DIPEA} = 10 \text{ mM}$ ,  $\text{Cp}^*\text{}_2\text{Fe} = 1 \text{ mM}$ .

## Description of Stopped-Flow Data Fitting

### 1Exp+Mx+C Fits

For the rate law determination of ORR by  $\text{Mn}^{(p\text{-}t\text{bu})\text{dhbpy}}\text{Cl}$  **1** with and without the presence of DIEPA and by  $\text{Mn}^{(n\text{Pr})\text{dhbpy}}\text{Cl}$  **2** with the presence of DIEPA, Kinetic Studio 4.0 was used to fit data sets with 1Exp+Mx+C.  $R_{\text{fit}}$  values were obtained by fitting the increase in absorbance at 780 nm versus time to a single exponential (1Exp+Mx+C) to achieve an  $R^2$  value of 0.99 (See Figures S54-S56). Where the fit equation contains an exponent (1Exp), a linear portion (Mx) and a non-zero intercept (C). The  $R_{\text{fit}}$  values were corrected for the number of electrons passed during catalysis and plotted against variable concentrations to obtain the experimental rate law.

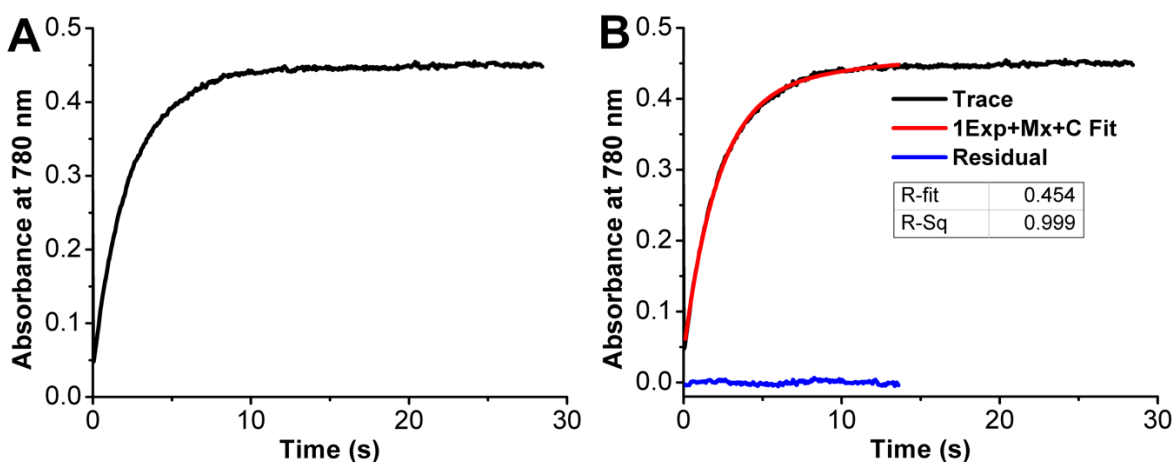

**Figure S54.** (A) Representative trace of time versus absorbance at 780 nm for ORR catalyzed by  $\text{Mn}^{(p\text{-}t\text{bu})\text{dhbpy}}\text{Cl}$  **1** with  $\text{DIPEAHPF}_6/\text{DIPEA}$  and (B) the 1Exp+Mx+C fit (red) and residual (blue) used for data analysis using the Kinetic Studio 4.0 software. Conditions:  $\text{Mn}^{(p\text{-}t\text{bu})\text{dhbpy}}\text{Cl}$  = 40  $\mu\text{M}$ ,  $\text{Cp}^*_2\text{Fe}$  = 1 mM,  $\text{O}_2$  = 4.05 mM, and  $\text{DIPEAHPF}_6/\text{DIPEA}$  = 10 mM.

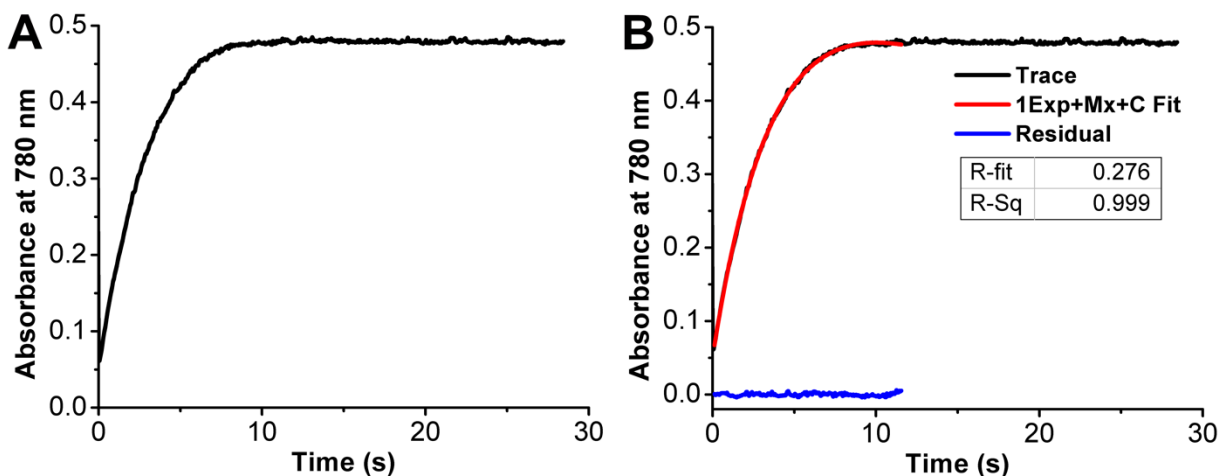

**Figure S55.** (A) Representative trace of time versus absorbance at 780 nm for ORR catalyzed by  $\text{Mn}^{(n\text{Pr})\text{dhbpy}}\text{Cl}$  **2** with  $\text{DIPEAHPF}_6/\text{DIPEA}$  and (B) the 1Exp+Mx+C fit (red) and residual (blue) used for data analysis using the Kinetic Studio 4.0 software. Conditions:  $\text{Mn}^{(n\text{Pr})\text{dhbpy}}\text{Cl}$  = 40  $\mu\text{M}$ ,  $\text{Cp}^*_2\text{Fe}$  = 1 mM,  $\text{O}_2$  = 4.05 mM, and  $\text{DIPEAHPF}_6/\text{DIPEA}$  = 10 mM.



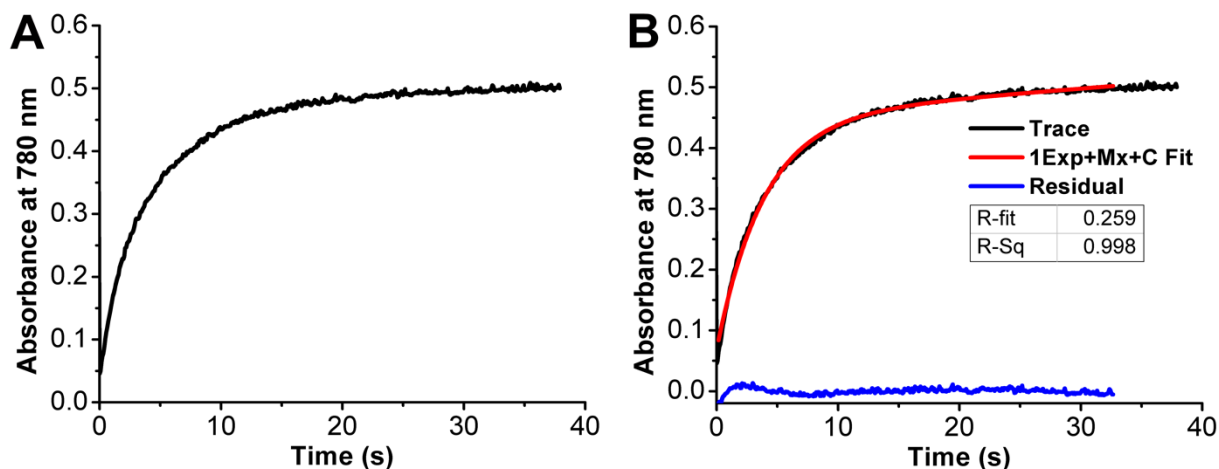

**Figure S56.** (A) Representative trace of time versus absorbance at 780 nm for ORR catalyzed by  $\text{Mn}^{(p\text{-}t\text{bu})\text{dhbpy}}\text{Cl}$  **1** with  $\text{DIPEAHPF}_6$  and (B) the 1Exp+Mx+C fit (red) and residual (blue) used for data analysis using the Kinetic Studio 4.0 software. Conditions:  $\text{Mn}^{(p\text{-}t\text{bu})\text{dhbpy}}\text{Cl}$  = 40  $\mu\text{M}$ ,  $\text{Cp}^*\text{Fe}$  = 1 mM,  $\text{O}_2$  = 4.05 mM, and  $\text{DIPEAHPF}_6$  = 10 mM.

#### Initial Rates Method

For the rate law determination of ORR by  $\text{Mn}^{(n\text{Pr})\text{dhbpy}}\text{Cl}$  **2** without the presence of DIPEA, the initial rates method was used due to the linearity of the observed curve. In this case, Initial ORR Rate values were obtained by taking slope of the linear fit of the initial region (~1.5 to ~50 s) in the Kinetic Studio 4.0 software of  $[\text{Cp}^*\text{Fe}]^+$  growth at 780 nm (units = relative absorbance/second). The results of the linear fit were processed to reflect the rate of ORR by converting the relative absorbance units to concentration using the molar extinction coefficient of  $[\text{Cp}^*\text{Fe}]^+$  ( $\epsilon = 461 \text{ M}^{-1}\text{cm}^{-1}$  as determined by serial dilution of a chemical prepared sample of  $[\text{Cp}^*\text{Fe}][\text{BF}_4]$ ) and correcting for the number of electrons passed during catalysis ( $n_{\text{cat}} = 2.08$ ). See **Figure S57** for description of the linear fits.

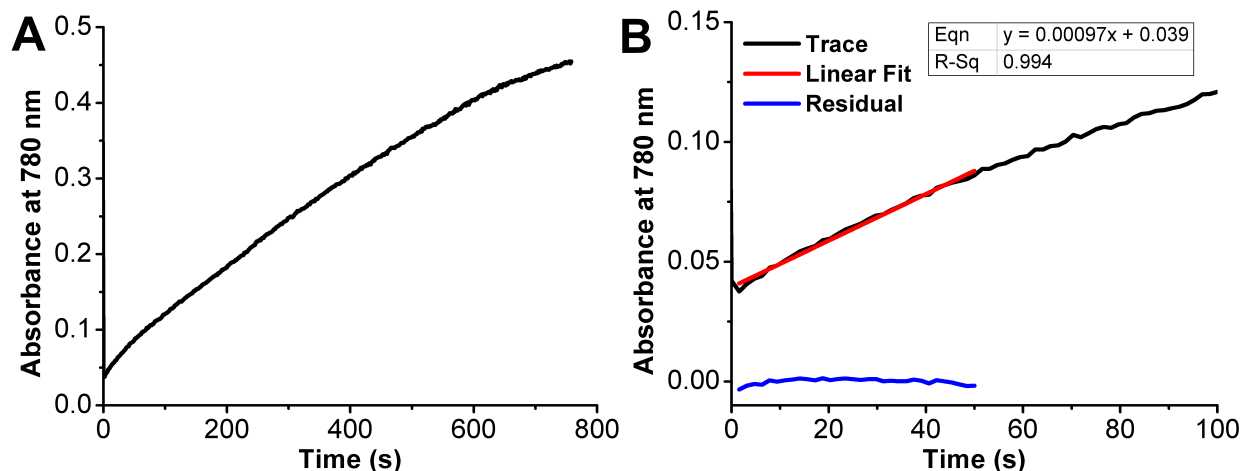

**Figure S57.** (A) Representative trace of time versus absorbance at 780 nm for ORR catalyzed by  $\text{Mn}^{(n\text{Pr})\text{dhbpy}}\text{Cl}$  **2** with  $\text{DIPEAHPF}_6$  and (B) the initial Linear fit (red) and residual (blue) used for data analysis using the Kinetic Studio 4.0 software. Conditions:  $\text{Mn}^{(n\text{Pr})\text{dhbpy}}\text{Cl}$  = 40  $\mu\text{M}$ ,  $\text{Cp}^*\text{Fe}$  = 1 mM,  $\text{O}_2$  = 4.05 mM, and  $\text{DIPEAHPF}_6$  = 10 mM.

## UV-vis Spectroscopic Analysis

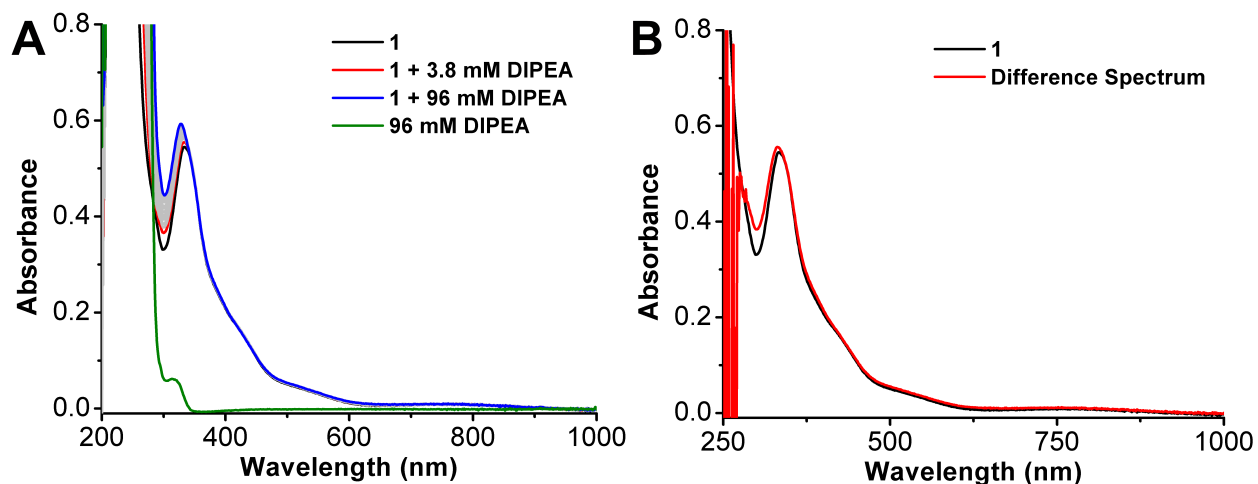

**Figure S58.** (A) UV-vis of spectra of  $23 \mu\text{M}$   $\text{Mn}^{(\text{p-tbu})\text{dhbpy}}\text{Cl}$  1 with increasing amounts of DIPEA in MeCN (B) difference spectrum of the final titration point (blue – green traces). Conditions: quartz cuvette with 1 cm pathlength;  $[\text{DIPEA}] = 3.8, 7.7, 12, 15.3, 19, 29, 38, 48, 57, 67, 77, 86, 96 \text{ mM}$ .

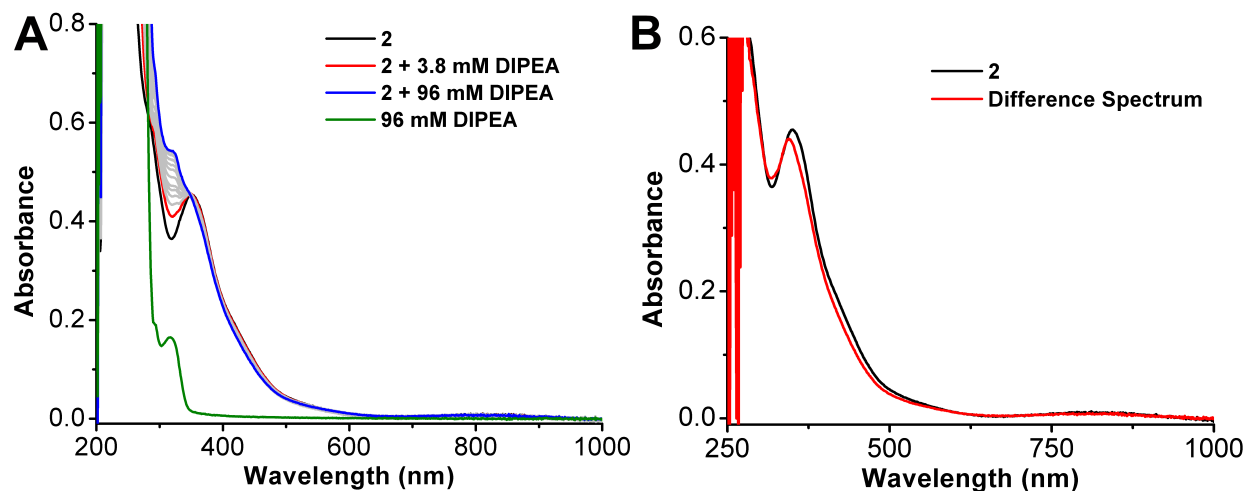

**Figure S59.** (A) UV-vis of spectra of  $26.8 \mu\text{M}$   $\text{Mn}^{(\text{nPr})\text{dhbpy}}\text{Cl}$  2 with increasing amounts of DIPEA in MeCN (B) difference spectrum of the final titration point (blue – green traces). Conditions: quartz cuvette with 1 cm pathlength;  $[\text{DIPEA}] = 3.8, 7.7, 12, 15.3, 19, 29, 38, 48, 57, 67, 77, 86, 96 \text{ mM}$ .

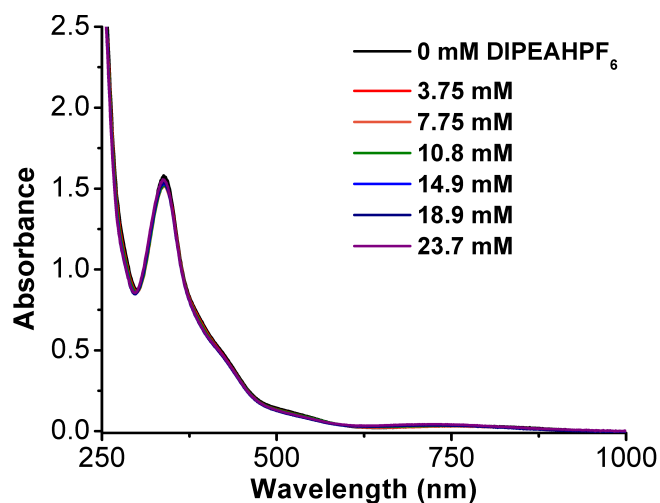

**Figure S60.** UV-vis of spectra of 80  $\mu\text{M}$   $\text{Mn}(\text{p-}^{\text{t}}\text{bu})\text{dhbpy})\text{Cl}$  **1** with increasing amounts of DIPEAHPF<sub>6</sub>. Conditions: quartz cuvette with 1 cm pathlength.

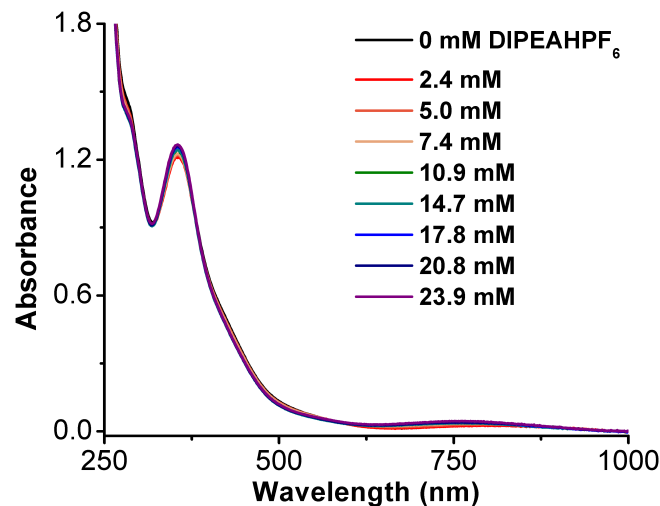

**Figure S61.** (A) UV-vis spectra of 80  $\mu\text{M}$   $\text{Mn}(\text{nPr})\text{dhbpy})\text{Cl}$  **2** with increasing amounts of DIPEAHPF<sub>6</sub> in MeCN. Conditions: quartz cuvette with 1 cm pathlength.

*UV-vis Spectroscopic Studies of  $\text{Mn}(\text{p-}^{\text{t}}\text{bu})\text{dhbpy})\text{Cl}$  **1** and Cobaltocene*

In order to better understand the reactivity of reduced  $\text{Mn}(\text{p-}^{\text{t}}\text{bu})\text{dhbpy})\text{Cl}$  **1** and  $\text{Mn}(\text{nPr})\text{dhbpy})\text{Cl}$  **2**, we used cobaltocene ( $\text{CoCp}_2$ ) as a chemical reductant in solution. Solutions were prepared in a  $\text{N}_2$  filled glovebox. To expose solutions to  $\text{O}_2$ , the cuvette was opened and inverted.

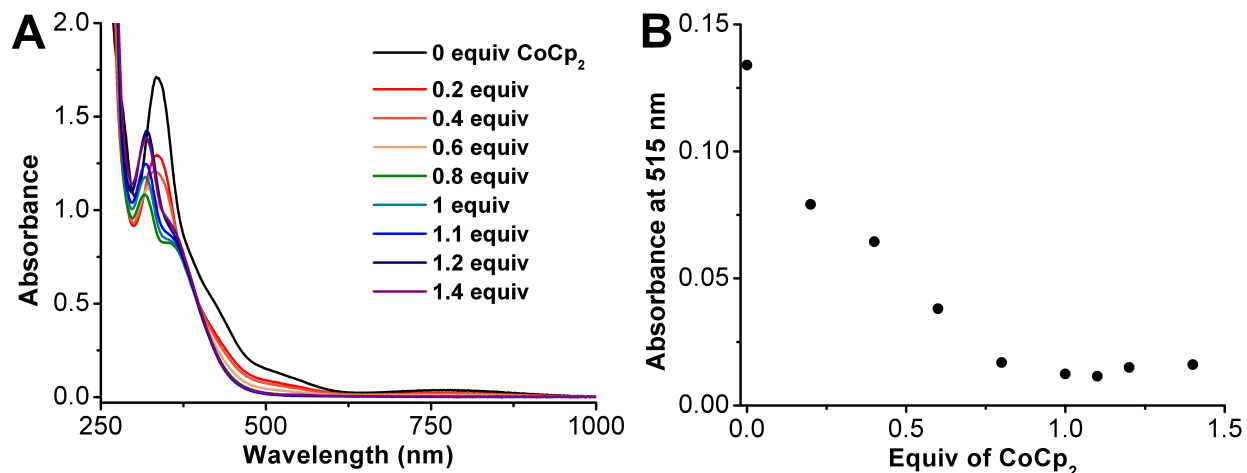

**Figure S62.** (A) UV-vis spectra of an 80  $\mu\text{M}$  solution of  $\text{Mn}^{(p\text{-}t\text{bu})\text{dhbp}}\text{Cl}$  **1** with increasing amounts of  $\text{CoCp}_2$  in MeCN under  $\text{N}_2$ . (B) Absorbance at 515 nm versus equivalents of  $\text{CoCp}_2$  relative to **1**. Conditions: quartz cuvette with 1 cm pathlength.

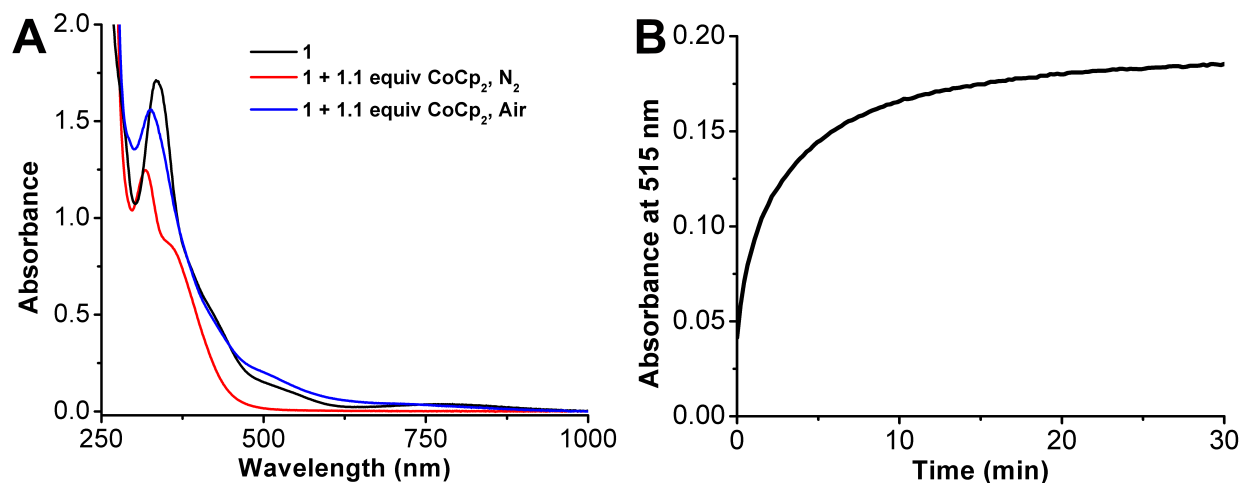

**Figure S63.** (A) UV-vis spectra of 80  $\mu\text{M}$  solution of  $\text{Mn}^{(p\text{-}t\text{bu})\text{dhbp}}\text{Cl}$  **1** in MeCN (black) under  $\text{N}_2$  with 1.1 equiv of  $\text{CoCp}_2$  (red) and after being exposed to air for 30 min (blue). (B) Time versus absorbance at 515 nm upon exposure of a 80  $\mu\text{M}$  solution of  $\text{Mn}^{(p\text{-}t\text{bu})\text{dhbp}}\text{Cl}$  with 1.1 equiv  $\text{CoCp}_2$  to air. Conditions: quartz cuvette with 1 cm pathlength.

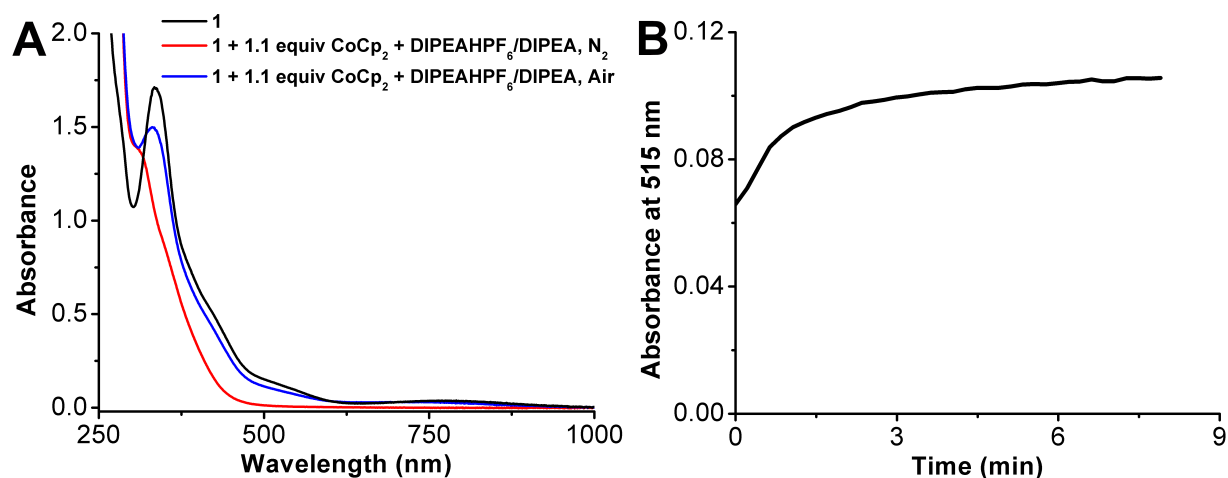

**Figure S64.** (A) UV-vis spectra of 80  $\mu\text{M}$  solution of  $\text{Mn}(\text{p-}^{\text{t}}\text{bu})\text{dhbpy})\text{Cl}$  **1** in MeCN (black) under  $\text{N}_2$  with 1.1 equiv of  $\text{CoCp}_2$  and 19.7 mM DIPEAHPF<sub>6</sub>/DIPEA (red) and after being exposed to air for 8 min (blue). (B) Time versus absorbance at 515 nm upon exposure of a 80  $\mu\text{M}$  solution of  $\text{Mn}(\text{p-}^{\text{t}}\text{bu})\text{dhbpy})\text{Cl}$  with 1.1 equiv  $\text{CoCp}_2$  and 19 mM DIPEAHPF<sub>6</sub>/DIPEA to air. Conditions: quartz cuvette with 1 cm pathlength.

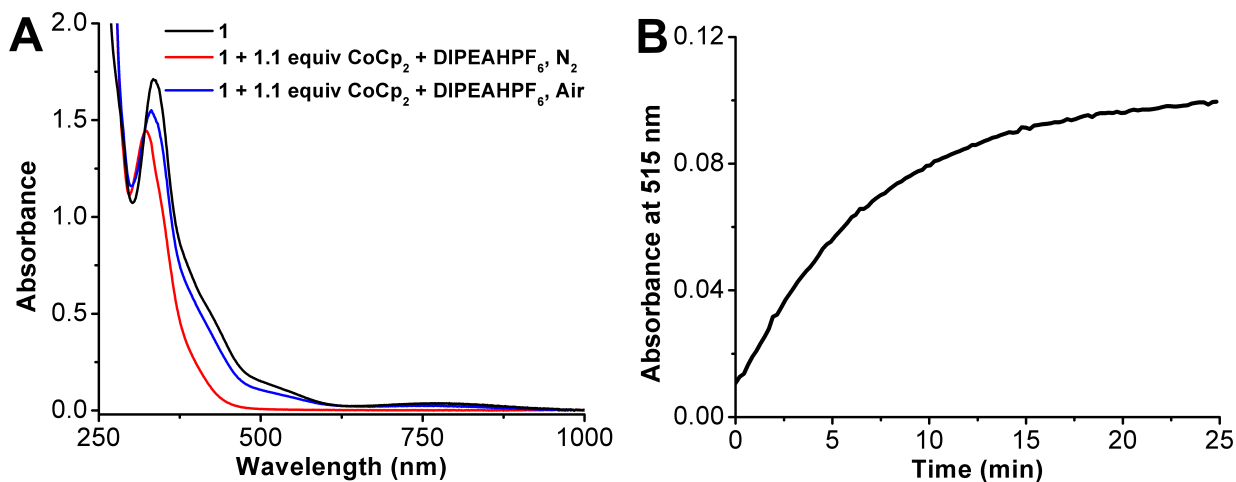

**Figure S65.** (A) UV-vis spectra of 80  $\mu\text{M}$  solution of  $\text{Mn}(\text{p-}^{\text{t}}\text{bu})\text{dhbpy})\text{Cl}$  **1** in MeCN (black) under  $\text{N}_2$  with 1.1 equiv of  $\text{CoCp}_2$  and 19.7 mM DIPEAHPF<sub>6</sub> (red) and after being exposed to air for 25 min (blue). (B) Time versus absorbance at 515 nm upon exposure of a 80  $\mu\text{M}$  solution of  $\text{Mn}(\text{p-}^{\text{t}}\text{bu})\text{dhbpy})\text{Cl}$  with 1.1 equiv  $\text{CoCp}_2$  and 19.7 mM DIPEAHPF<sub>6</sub> to air. Conditions: quartz cuvette with 1 cm pathlength.

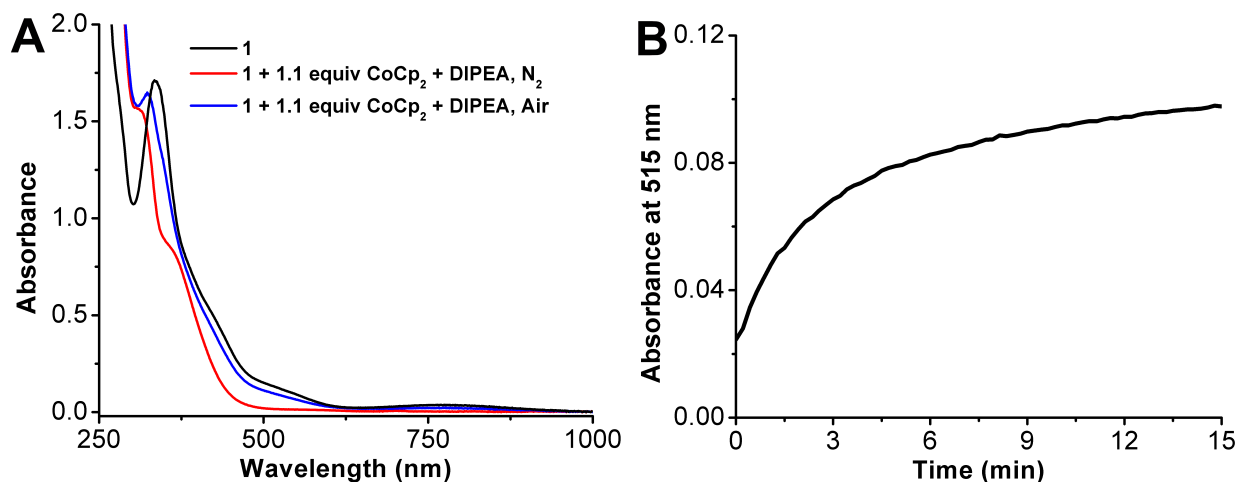

**Figure S66.** (A) UV-vis spectra of 80  $\mu\text{M}$  solution of  $\text{Mn}^{(p\text{-tbu})\text{dhbpy}}\text{Cl}$  **1** in MeCN (black) under  $\text{N}_2$  with 1.1 equiv of  $\text{CoCp}_2$  and 19 mM DIPEA (red) and after being exposed to air for 15 min (blue). (B) Time versus absorbance at 515 nm upon exposure of a 80  $\mu\text{M}$  solution of  $\text{Mn}^{(p\text{-tbu})\text{dhbpy}}\text{Cl}$  with 1.1 equiv  $\text{CoCp}_2$  and 19 mM DIPEA to air. Conditions: quartz cuvette with 1 cm pathlength.

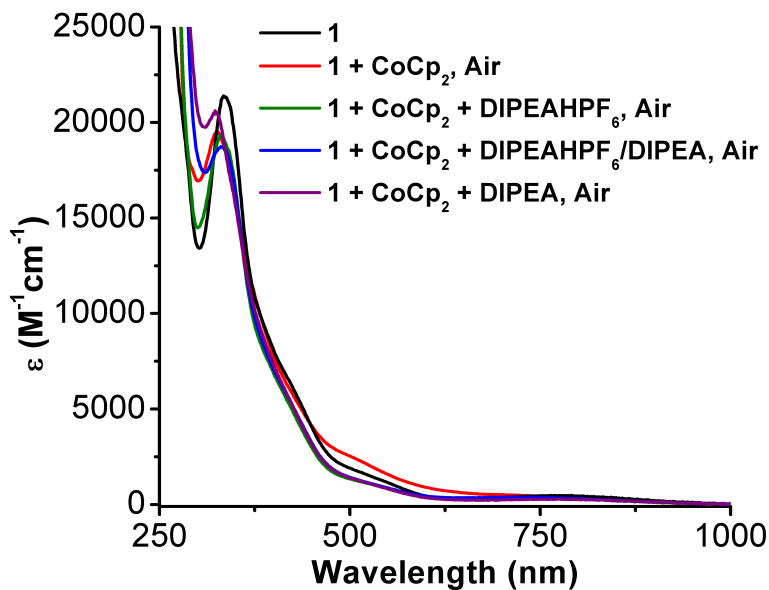

**Figure S67.** Overlay of data involving  $\text{Mn}^{(p\text{-tbu})\text{dhbpy}}\text{Cl}$  **1** from **Figs S63-S66** after samples were allowed to react with air completely.

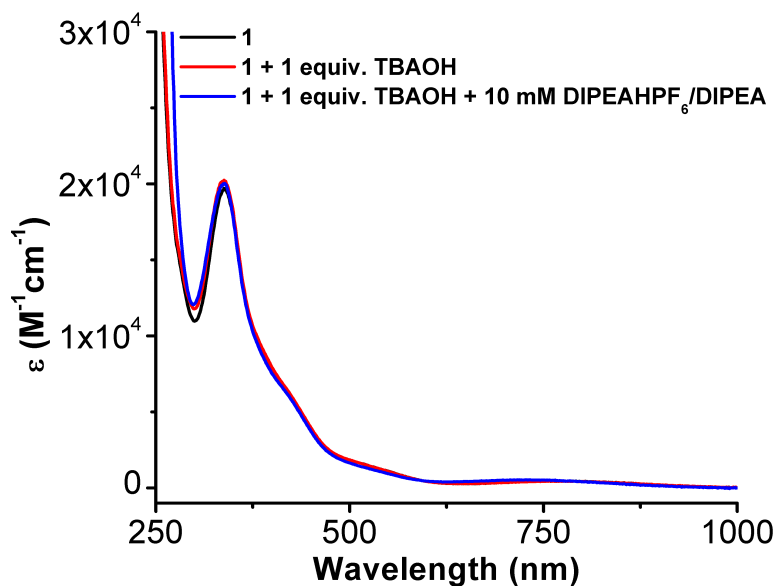

**Figure S68.** UV-vis spectra of  $80 \mu\text{M}$   $\text{Mn}(\text{p-tbu})\text{dhbpy})\text{Cl}$  **1** with (red) and without (black) 1 equiv TBAOH $\cdot$ 30H<sub>2</sub>O and with of 10 mM buffer (1:1 DIPEAHPF<sub>6</sub>:DIPEA) in the presence of 1 equiv TBAOH $\cdot$ 30H<sub>2</sub>O (blue). Conditions: quartz cuvette with 1 cm pathlength.

*UV-vis Spectroscopic Studies of  $\text{Mn}(\text{nPr})\text{dhbpy})\text{Cl}$  **2** and Cobaltocene*

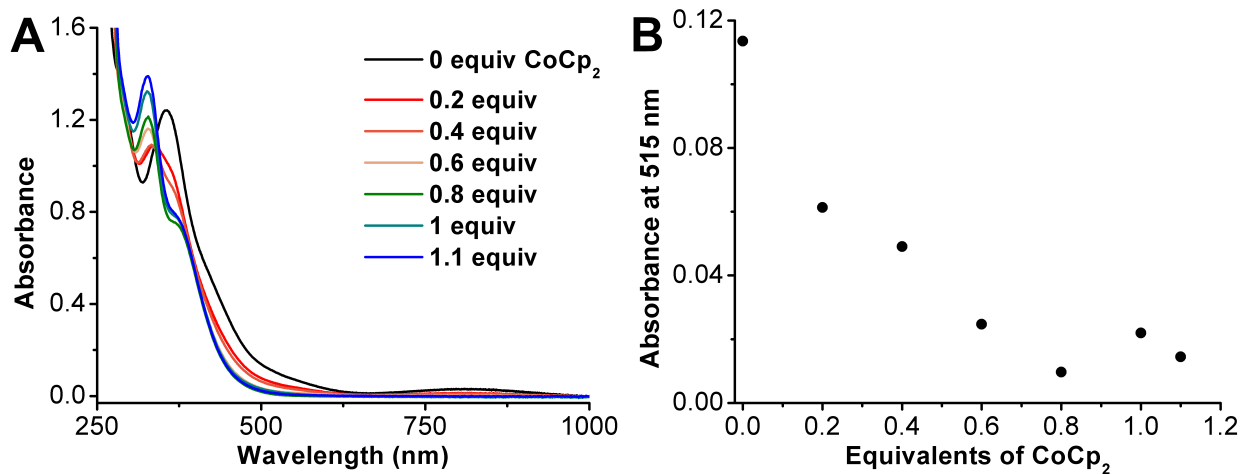

**Figure S69.** (A) UV-vis spectra of an  $80 \mu\text{M}$  solution of  $\text{Mn}(\text{nPr})\text{dhbpy})\text{2}$  with increasing amounts of  $\text{CoCp}_2$  in MeCN under  $\text{N}_2$ . (B) Absorbance at 515 nm versus equivalents of  $\text{CoCp}_2$  relative to **[2]**. Conditions: quartz cuvette with 1 cm pathlength.

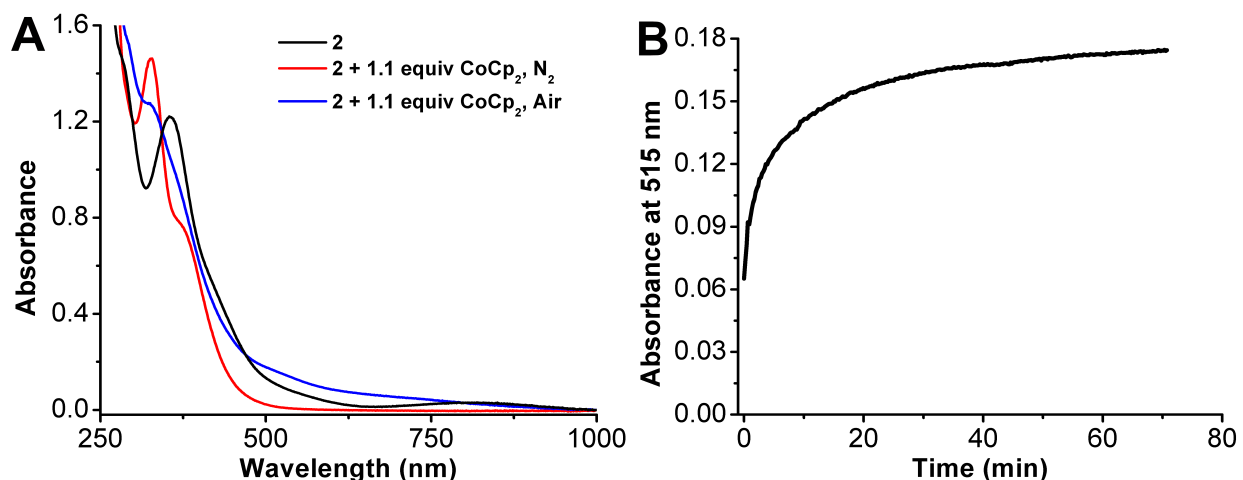

**Figure S70.** (A) UV-vis spectra of 80  $\mu\text{M}$  solution of  $\text{Mn}^{(\text{nPr})\text{dhbpy}}\text{Cl}$  **2** in MeCN (black) under  $\text{N}_2$  with 1.1 equiv of  $\text{CoCp}_2$  (red) and after being exposed to air for 70 min (blue). (B) Time versus absorbance at 515 nm upon exposure of an 80  $\mu\text{M}$  solution of  $\text{Mn}^{(\text{nPr})\text{dhbpy}}\text{Cl}$  with 1.1 equiv  $\text{CoCp}_2$  to air. Conditions: quartz cuvette with 1 cm pathlength.

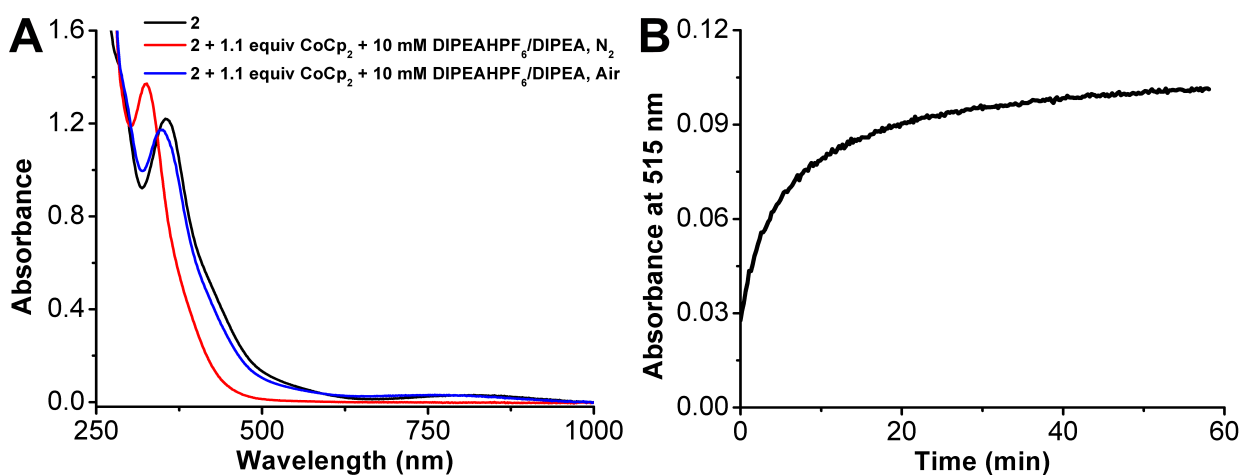

**Figure S71.** (A) UV-vis spectra of 80  $\mu\text{M}$  solution of  $\text{Mn}^{(\text{nPr})\text{dhbpy}}\text{Cl}$  **2** in MeCN (black) under  $\text{N}_2$  with 1.1 equiv of  $\text{CoCp}_2$  and 10 mM DIPEAHPF<sub>6</sub>/DIPEA (red) and after being exposed to air for 60 min (blue). (B) Time versus absorbance at 515 nm upon exposure of an 80  $\mu\text{M}$  solution of  $\text{Mn}^{(\text{nPr})\text{dhbpy}}\text{Cl}$  with 1.1 equiv  $\text{CoCp}_2$  and 10 mM DIPEAHPF<sub>6</sub>/DIPEA to air. Conditions: quartz cuvette with 1 cm pathlength.



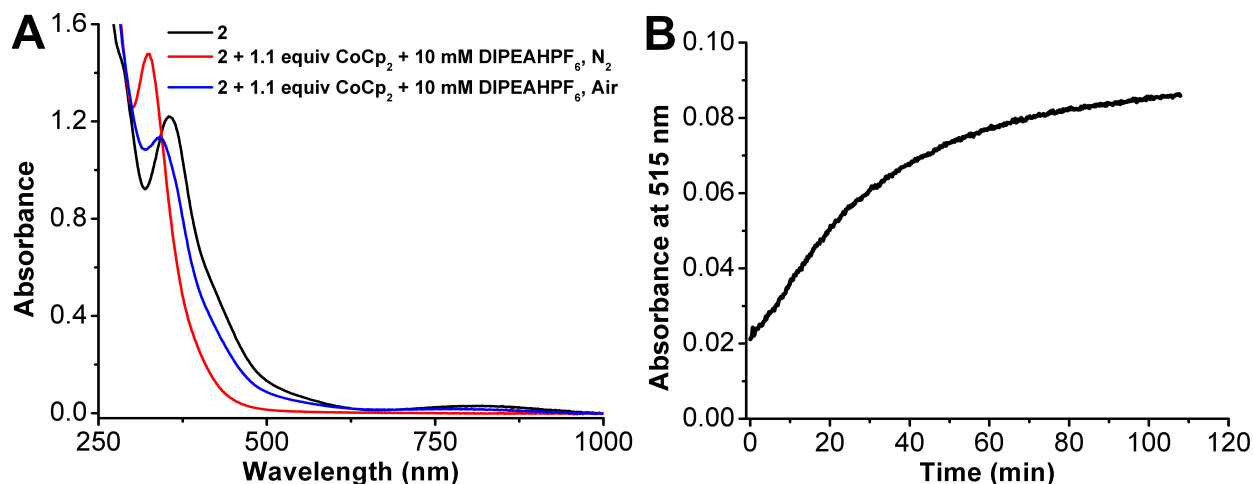

**Figure S72.** (A) UV-vis spectra of 80  $\mu\text{M}$  solution of  $\text{Mn}^{(\text{nPr})\text{dhbpy}}\text{Cl } \mathbf{2}$  in MeCN (black) under  $\text{N}_2$  with 1.1 equiv of  $\text{CoCp}_2$  and 10 mM DIPEAHPF<sub>6</sub> (red) and after being exposed to air for 110 min (blue). (B) Time versus absorbance at 515 nm upon exposure of an 80  $\mu\text{M}$  solution of  $\text{Mn}^{(\text{nPr})\text{dhbpy}}\text{Cl}$  with 1.1 equiv  $\text{CoCp}_2$  and 10 mM DIPEAHPF<sub>6</sub> to air. Conditions: quartz cuvette with 1 cm pathlength.

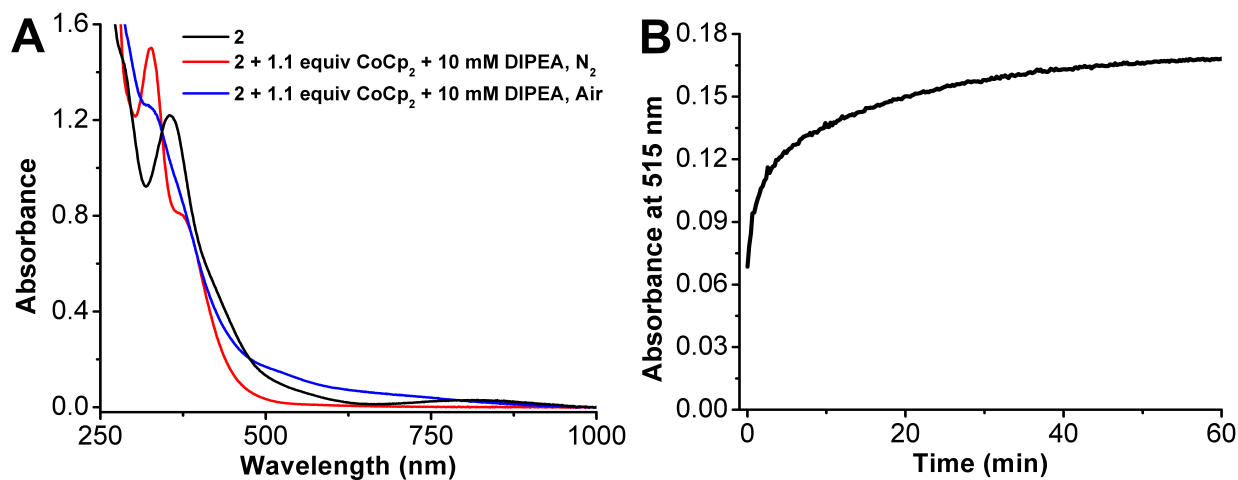

**Figure S73.** (A) UV-vis spectra of 80  $\mu\text{M}$  solution of  $\text{Mn}^{(\text{nPr})\text{dhbpy}}\text{Cl } \mathbf{2}$  in MeCN (black) under  $\text{N}_2$  with 1.1 equiv of  $\text{CoCp}_2$  and 10 mM DIPEA (red) and after being exposed to air for 60 min (blue). (B) Time versus absorbance at 515 nm upon exposure of an 80  $\mu\text{M}$  solution of  $\text{Mn}^{(\text{nPr})\text{dhbpy}}\text{Cl}$  with 1.1 equiv  $\text{CoCp}_2$  and 10 mM DIPEA to air. Conditions: quartz cuvette with 1 cm pathlength.

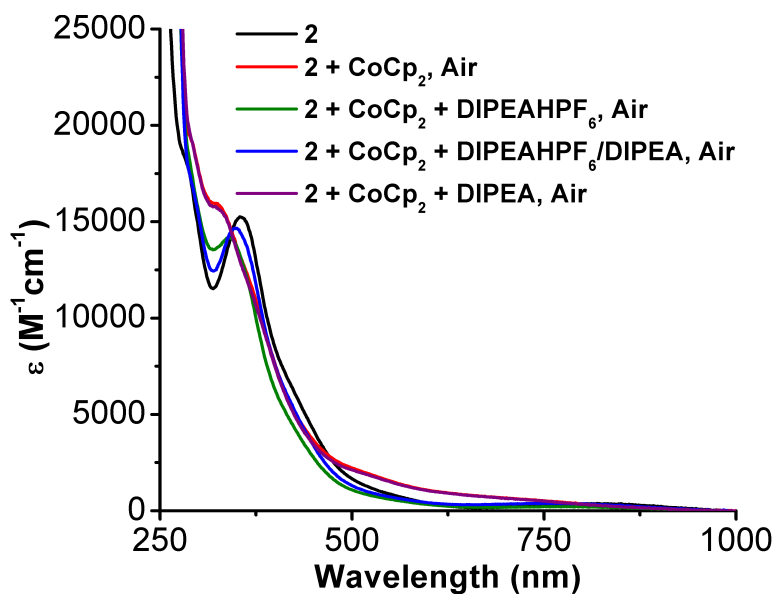

**Figure S74.** Overlay of data involving  $\text{Mn}(\text{nPrdhbpy})\text{Cl}$  2 from **Figs S70-S73** after samples were allowed to react with air completely.

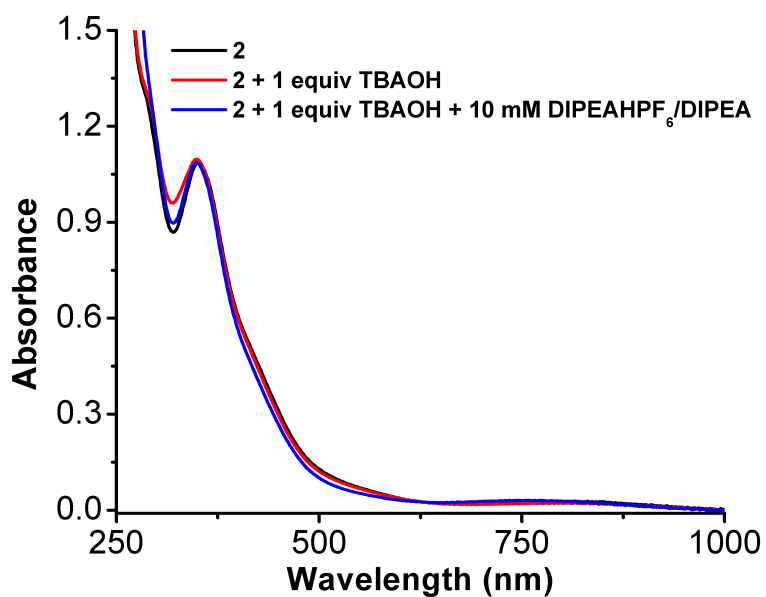

**Figure S75.** UV-vis spectra of 80  $\mu\text{M}$   $\text{Mn}(\text{nPrdhbpy})\text{Cl}$  2 with (red) and without (black) 1 equiv TBAOH $\cdot$ 30 $\text{H}_2\text{O}$  and with of 10 mM buffer (1:1  $\text{DIPEAHPF}_6$ :DIPEA) in the presence of 1 equiv TBAOH $\cdot$ 30 $\text{H}_2\text{O}$  (blue). Conditions: quartz cuvette with 1 cm pathlength.

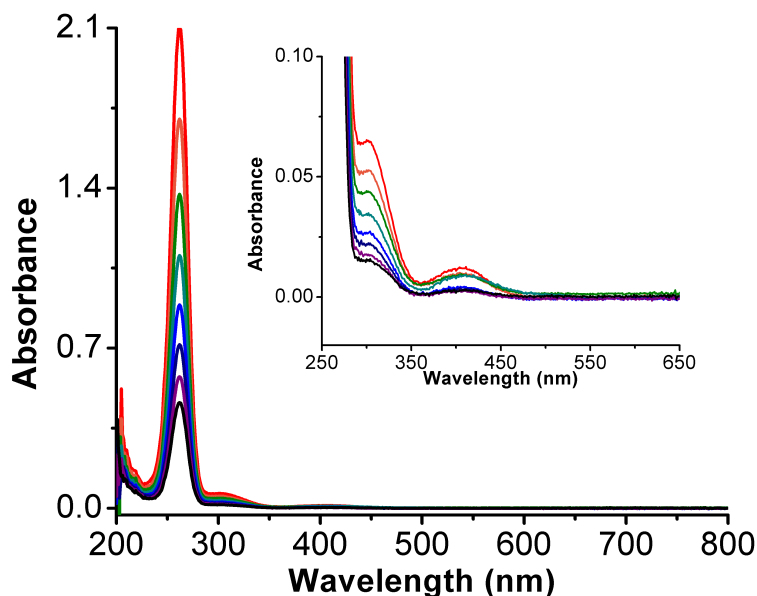

**Figure S76.** (A) UV-vis titration of  $[\text{CoCp}_2][\text{PF}_6]$  in MeCN. Conditions:  $[\text{CoCp}_2][\text{PF}_6] = 1.97 \times 10^{-4}$ ,  $1.64 \times 10^{-4}$ ,  $1.37 \times 10^{-4}$ ,  $1.14 \times 10^{-4}$ ,  $9.50 \times 10^{-5}$ ,  $7.91 \times 10^{-5}$ ,  $6.59 \times 10^{-5}$ ,  $5.50 \times 10^{-5}$  M; 1 cm pathlength cuvette.

### Computational Methods

Geometry optimizations were performed without geometry constraints at the DFT level with the Gaussian 16 program, Rev B.01,<sup>8</sup> employing the hybrid functional B3LYP<sup>9</sup> and the def2-SVP basis set was used for all atoms.<sup>10</sup> Dispersion and bulk solvent effects (acetonitrile = MeCN) were accounted for at the optimization stage, by using Grimme's D3 parameter set with Becke-Johnson (BJ) damping<sup>11</sup> and the SMD continuum model,<sup>12</sup> respectively. The stationary points and their nature as minima (no imaginary frequencies) were characterized by vibrational analysis using the IGRRHO approach as implemented by default in the software package, which also produced enthalpy (H), entropy (S) and Gibbs energy (G) data at 298.15 K. The minima connected by a given transition state were determined by perturbing the transition states along the TS coordinate and optimizing to the nearest minimum. Free energies were corrected ( $\Delta G_{\text{qh}}$ ) to account for concentration effects and for errors associated with the harmonic oscillator approximation. Thus, according to Truhlar's quasi-harmonic approximation for vibrational entropy and enthalpy, all vibrational frequencies below  $100 \text{ cm}^{-1}$  were set to this value.<sup>13</sup> These anharmonic and concentration corrections were calculated with the Goodvibes code.<sup>14</sup> Concentrations were set at 0.001 M for metal complexes, 0.05 M for DIPEAH and DIPEA, 0.004 M for  $\text{O}_2$  and 18.9 M for MeCN. Energies were refined by means of single point calculations with the ORCA 5.0 program,<sup>15</sup> employing the range-separated hybrid functional  $\omega\text{B97M-V}$ <sup>16</sup> and the def2-TZVPP basis set.<sup>17</sup> Dispersion effects were treated with Grimme's D4 parameter set<sup>18</sup> according to the method of Najibi and Goerigk<sup>19</sup> and solvation again by the SMD model. The stability of the wavefunction and spin contamination were studied at the double- and triple-zeta levels of theory.

The labelling scheme for minima is  $\text{Mn}(\text{multiplicity}/\text{charge})(\text{axial ligands})$  for metal complexes; the dianionic tetradentate ligand framework is a common feature of all Mn species and does not change its coordination mode during the reaction, so it is omitted in the notation where possible for clarity.

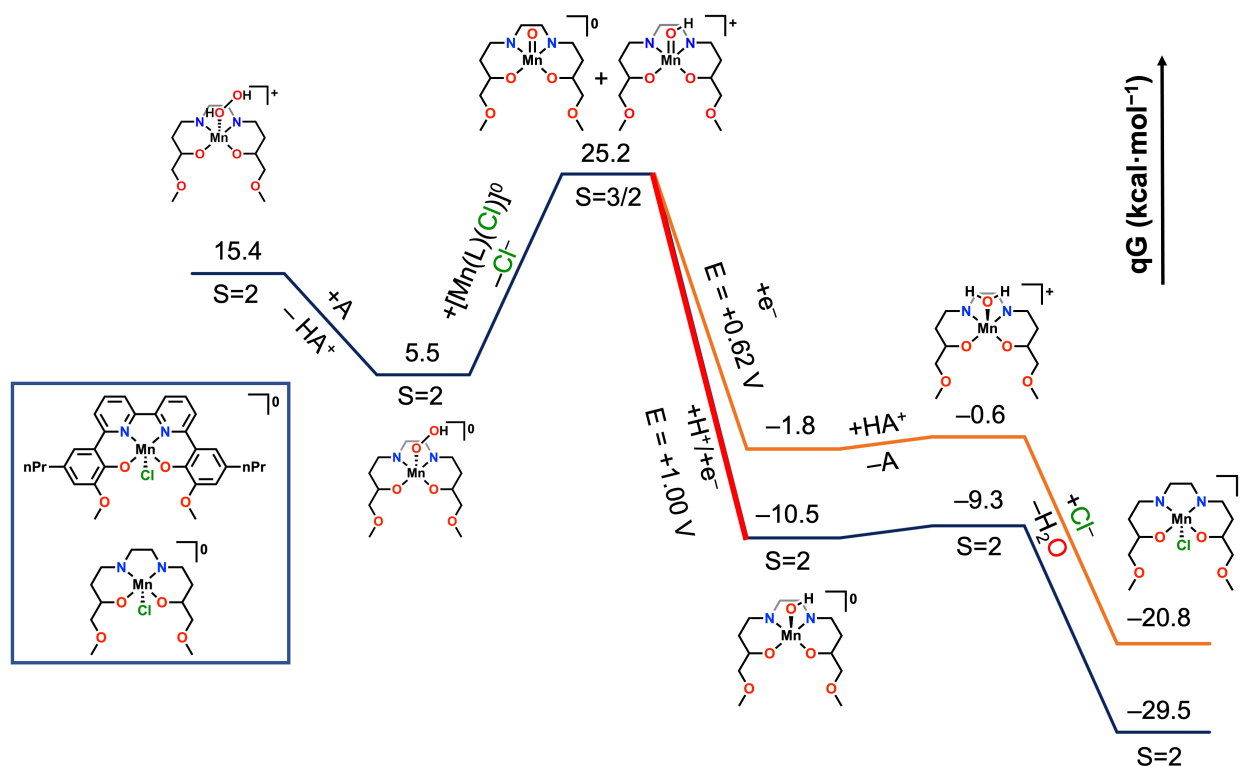

**Figure S77.** Free energy diagram of ORR by  $\text{Mn}(\text{nPr-dhbp})\text{Cl}$  **2** to  $\text{H}_2\text{O}$ .

### Single Crystal Diffraction Studies

A single crystal of **2**  $\text{Mn}(\text{nPr-dhbp})\text{Cl}$  or  $\text{DIPEAPF}_6$  was coated with Paratone oil and mounted on a MiTeGen MicroLoop. The X-ray intensity data were measured on a Bruker D8 Venture Photon III Kappa four-circle diffractometer system equipped with Incoatec  $1\mu\text{S}$  3.0 micro-focus sealed X-ray tubes ( $\text{Cu K}\alpha$ ,  $\lambda = 1.54178 \text{ \AA}$ ;  $\text{Mo K}\alpha$ ,  $\lambda = 0.71073 \text{ \AA}$ ) and HELIOS double bounce multilayer mirror monochromators. The frames were integrated with the Bruker SAINT software package<sup>20</sup> a narrow-frame algorithm. Data were corrected for absorption effects using the Multi-Scan method (SADABS).<sup>21</sup> Each structure was solved and refined using the Bruker SHELXTL Software Package<sup>22</sup> within APEX4<sup>20</sup> and OLEX2.<sup>23</sup> Non-hydrogen atoms were refined anisotropically. The N-H hydrogen atom in  $\text{DIPEAHPF}_6$  was located in the electron density map and refined isotropically. All other hydrogen atoms in both structures were placed in geometrically calculated positions with  $U_{\text{iso}} = 1.2U_{\text{equiv}}$  of the parent atom ( $1.5U_{\text{equiv}}$  for methyl). The relative occupancy of the disordered atoms in each structure was freely refined, with constraints and restraints used on the anisotropic displacement parameters and bond lengths of the disordered F atoms only.

**Table S14.** Crystallographic details for Mn(<sup>nPr</sup>dhbpy)Cl **2** and DIPEAHPF<sub>6</sub>

|                                | <b>2</b> Mn( <sup>nPr</sup> dhbpy)Cl                                                          | DIPEAHPF <sub>6</sub>                            |
|--------------------------------|-----------------------------------------------------------------------------------------------|--------------------------------------------------|
| CCDC number                    | 2255849                                                                                       | 2255850                                          |
| Formula                        | C <sub>64</sub> H <sub>66</sub> Cl <sub>2</sub> Mn <sub>2</sub> N <sub>6</sub> O <sub>8</sub> | C <sub>8</sub> H <sub>20</sub> F <sub>6</sub> NP |
| FW (g/mol)                     | 1228.00                                                                                       | 275.22                                           |
| Temp (K)                       | 100(2)                                                                                        | 100(2)                                           |
| λ (Å)                          | 1.54178                                                                                       | 0.71073                                          |
| Size (mm)                      | 0.030 x 0.047 x 0.505                                                                         | 0.085 x 0.088 x 0.122                            |
| Crystal habit                  | brown-yellow rod                                                                              | colourless needle                                |
| Crystal system                 | monoclinic                                                                                    | monoclinic                                       |
| Space group                    | P 2 <sub>1</sub> /c                                                                           | P 2 <sub>1</sub> /n                              |
| a (Å)                          | 15.3780(4)                                                                                    | 8.2349(2)                                        |
| b(Å)                           | 9.8097(2)                                                                                     | 17.2894(6)                                       |
| c (Å)                          | 20.2954(5)                                                                                    | 8.9716(3)                                        |
| α (°)                          | 90                                                                                            | 90                                               |
| β (°)                          | 109.0756(18)                                                                                  | 97.3780(10)                                      |
| γ (°)                          | 90                                                                                            | 90                                               |
| Volume (Å <sup>3</sup> )       | 2893.51(12)                                                                                   | 1266.77(7)                                       |
| Z                              | 2                                                                                             | 4                                                |
| Density (g/cm <sup>3</sup> )   | 1.409                                                                                         | 1.443                                            |
| μ (mm <sup>-1</sup> )          | 4.904                                                                                         | 0.266                                            |
| F(000)                         | 1280                                                                                          | 576                                              |
| θ range (°)                    | 3.04 to 68.36                                                                                 | 2.36 to 28.29                                    |
| Index ranges                   | -18 ≤ h ≤ 18<br>-11 ≤ k ≤ 10<br>-24 ≤ l ≤ 24                                                  | -10 ≤ h ≤ 10<br>-23 ≤ k ≤ 22<br>-10 ≤ l ≤ 11     |
| Reflns collected               | 34823                                                                                         | 30006                                            |
| Independent reflns             | 5293 [R <sub>int</sub> = 0.0881]                                                              | 3123 [R <sub>int</sub> = 0.0428]                 |
| Data / restraints / parameters | 5293 / 0 / 404                                                                                | 3123 / 28 / 173                                  |
| GOF on F <sup>2</sup>          | 1.027                                                                                         | 1.059                                            |
| R <sub>1</sub> (I > 2σ(I))     | 0.0505                                                                                        | 0.0401                                           |
| wR <sub>2</sub> (all data)     | 0.1376                                                                                        | 0.1041                                           |

## References

- (1) Li, Q.; Batchelor-McAuley, C.; Lawrence, N. S.; Hartshorne, R. S.; Compton, R. G. Anomalous solubility of oxygen in acetonitrile/water mixture containing tetra-n-butylammonium perchlorate supporting electrolyte; the solubility and diffusion coefficient of oxygen in anhydrous acetonitrile and aqueous mixtures. *Journal of Electroanalytical Chemistry* **2013**, *688*, 328-335. DOI: <https://doi.org/10.1016/j.jelechem.2012.07.039>.
- (2) Nichols, A. W.; Cook, E. N.; Gan, Y. J.; Miedaner, P. R.; Dressel, J. M.; Dickie, D. A.; Shafaat, H. S.; Machan, C. W. Pendant Relay Enhances H<sub>2</sub>O<sub>2</sub> Selectivity during Dioxygen Reduction Mediated by Bipyridine-Based Co–N<sub>2</sub>O<sub>2</sub> Complexes. *Journal of the American Chemical Society* **2021**, *143* (33), 13065-13073. DOI: 10.1021/jacs.1c03381.
- (3) Hooe, S. L.; Rheingold, A. L.; Machan, C. W. Electrocatalytic Reduction of Dioxygen to Hydrogen Peroxide by a Molecular Manganese Complex with a Bipyridine-Containing Schiff Base Ligand. *Journal of the American Chemical Society* **2018**, *140* (9), 3232-3241. DOI: 10.1021/jacs.7b09027.
- (4) Saba, S.; Hernandez, R.; Choy, C. C.; Carta, K.; Bennett, Y.; Bondi, S.; Kolaj, S.; Bennett, C. A simple and efficient one-step protocol for the preparation of alkyl-substituted ammonium

- tetrafluoroborate and hexafluorophosphate salts. *Journal of Fluorine Chemistry* **2013**, *153*, 168-171. DOI: <https://doi.org/10.1016/j.jfluchem.2013.05.007>.
- (5) Shivapurkar, R.; Jeannerat, D. Determination of the relative pKa's of mixtures of organic acids using NMR titration experiments based on aliased <sup>1</sup>H–<sup>13</sup>C HSQC spectra. *Analytical Methods* **2011**, *3* (6), 1316-1322, 10.1039/C0AY00771D. DOI: 10.1039/C0AY00771D.
- (6) Espinoza, E. M.; Clark, J. A.; Soliman, J.; Derr, J. B.; Morales, M.; Vullev, V. I. Practical Aspects of Cyclic Voltammetry: How to Estimate Reduction Potentials When Irreversibility Prevails. *Journal of The Electrochemical Society* **2019**, *166* (5), H3175. DOI: 10.1149/2.0241905jes.
- (7) Hooe, S. L.; Machan, C. W. Dioxygen Reduction to Hydrogen Peroxide by a Molecular Mn Complex: Mechanistic Divergence between Homogeneous and Heterogeneous Reductants. *Journal of the American Chemical Society* **2019**, *141* (10), 4379-4387. DOI: 10.1021/jacs.8b13373. Anson, C. W.; Stahl, S. S. Cooperative Electrocatalytic O<sub>2</sub> Reduction Involving Co(salophen) with p-Hydroquinone as an Electron-Proton Transfer Mediator. *Journal of the American Chemical Society* **2017**, *139* (51), 18472-18475. DOI: 10.1021/jacs.7b11362.
- (8) *Gaussian 16 Rev. B.01*; Wallingford, CT, 2016.
- (9) Becke, A. D. Density-functional thermochemistry. III. The role of exact exchange. *J. Chem. Phys.* **1993**, *98* (7), 5648-5652. DOI: <http://dx.doi.org/10.1063/1.464913>. Lee, C.; Yang, W.; Parr, R. G. Development of the Colle-Salvetti correlation-energy formula into a functional of the electron density. *Phys. Rev. B* **1988**, *37* (2), 785-789. Vosko, S. H.; Wilk, L.; Nusair, M. Accurate spin-dependent electron liquid correlation energies for local spin density calculations: a critical analysis. *Can. J. Phys.* **1980**, *58* (8), 1200-1211. DOI: 10.1139/p80-159 (accessed 2016/05/20). Stephens, P. J.; Devlin, F. J.; Chabalowski, C. F.; Frisch, M. J. Ab Initio Calculation of Vibrational Absorption and Circular Dichroism Spectra Using Density Functional Force Fields. *J. Phys. Chem.* **1994**, *98* (45), 11623-11627. DOI: 10.1021/j100096a001.
- (10) Weigend, F.; Ahlrichs, R. Balanced basis sets of split valence, triple zeta valence and quadruple zeta valence quality for H to Rn: Design and assessment of accuracy. *Phys. Chem. Chem. Phys.* **2005**, *7* (18), 3297-3305, 10.1039/B508541A. DOI: 10.1039/B508541A. Weigend, F. Accurate Coulomb-fitting basis sets for H to Rn. *Phys. Chem. Chem. Phys.* **2006**, *8* (9), 1057-1065, 10.1039/B515623H. DOI: 10.1039/B515623H.
- (11) Grimme, S.; Antony, J.; Ehrlich, S.; Krieg, H. A consistent and accurate ab initio parametrization of density functional dispersion correction (DFT-D) for the 94 elements H-Pu. *J. Chem. Phys.* **2010**, *132* (15), 154104. DOI: <http://dx.doi.org/10.1063/1.3382344>. Grimme, S.; Ehrlich, S.; Goerigk, L. Effect of the damping function in dispersion corrected density functional theory. *J. Comput. Chem.* **2011**, *32* (7), 1456-1465. DOI: 10.1002/jcc.21759.
- (12) Marenich, A. V.; Cramer, C. J.; Truhlar, D. G. Universal solvation model based on solute electron density and on a continuum model of the solvent defined by the bulk dielectric constant and atomic surface tensions. *Journal of Physical Chemistry B* **2009**, *113* (18), 6378-6396. DOI: 10.1021/jp810292n.
- (13) Ribeiro, R. F.; Marenich, A. V.; Cramer, C. J.; Truhlar, D. G. Use of Solution-Phase Vibrational Frequencies in Continuum Models for the Free Energy of Solvation. *J. Phys. Chem. B* **2011**, *115* (49), 14556-14562. DOI: 10.1021/jp205508z.
- (14) *Goodvibes v3.0.1*; 2019. <https://doi.org/10.5281/zenodo.3346166>.
- (15) Neese, F. Software update: The ORCA program system—Version 5.0. *WIREs Computational Molecular Science* **2022**, *n/a* (n/a), e1606, <https://doi.org/10.1002/wcms.1606>. DOI: <https://doi.org/10.1002/wcms.1606>.

- (16) Mardirossian, N.; Head-Gordon, M.  $\omega$ B97M-V: A combinatorially optimized, range-separated hybrid, meta-GGA density functional with VV10 nonlocal correlation. *The Journal of Chemical Physics* **2016**, *144* (21), 214110. DOI: 10.1063/1.4952647.
- (17) Weigend, F.; Ahlrichs, R. Balanced basis sets of split valence, triple zeta valence and quadruple zeta valence quality for H to Rn: Design and assessment of accuracy. *Physical Chemistry Chemical Physics* **2005**, *7* (18), 3297-3305. DOI: 10.1039/b508541a. Weigend, F. Accurate Coulomb-fitting basis sets for H to Rn. *Physical Chemistry Chemical Physics* **2006**, *8* (9), 1057-1065. DOI: 10.1039/b515623h. Hellweg, A.; Hättig, C.; Höfener, S.; Klopper, W. Optimized accurate auxiliary basis sets for RI-MP2 and RI-CC2 calculations for the atoms Rb to Rn. *Theoretical Chemistry Accounts* **2007**, *117* (4), 587-597. DOI: 10.1007/s00214-007-0250-5.
- (18) Caldeweyher, E.; Bannwarth, C.; Grimme, S. Extension of the D3 dispersion coefficient model. *The Journal of Chemical Physics* **2017**, *147* (3), 034112. DOI: 10.1063/1.4993215 (accessed 5/15/2023). Caldeweyher, E.; Ehlert, S.; Hansen, A.; Neugebauer, H.; Spicher, S.; Bannwarth, C.; Grimme, S. A generally applicable atomic-charge dependent London dispersion correction. *The Journal of Chemical Physics* **2019**, *150* (15), 154122. DOI: 10.1063/1.5090222 (accessed 5/15/2023).
- (19) Najibi, A.; Goerigk, L. DFT-D4 counterparts of leading meta-generalized-gradient approximation and hybrid density functionals for energetics and geometries. *Journal of Computational Chemistry* **2020**, *41* (30), 2562-2572, <https://doi.org/10.1002/jcc.26411>. DOI: <https://doi.org/10.1002/jcc.26411>.
- (20) *Saint; APEX4*; Bruker AXS Inc.: Madison, Wisconsin, USA, 2019.
- (21) Krause, L.; Herbst-Irmer, R.; Sheldrick, G. M.; Stalke, D. Comparison of silver and molybdenum microfocus X-ray sources for single-crystal structure determination. *Journal of Applied Crystallography* **2015**, *48* (1), 3-10. DOI: 10.1107/S1600576714022985.
- (22) Sheldrick, G. M. SHELXT - Integrated space-group and crystal-structure determination. *Acta Crystallographica* **2015**, *71* (1), 3-8. DOI: 10.1107/S2053273314026370.
- (23) Dolomanov, O. V.; Bourhis, L. J.; Gildea, R. J.; Howard, J. A. K.; Puschmann, H. OLEX2: A Complete Structure Solution, Refinement and Analysis Program. *Journal of Applied Crystallography* **2009**, *42*, 339-341. DOI: 10.1107/S0021889808042726.
